# Supplementary material for: Comparative Genomics Unveils Functional Diversity, Pangenome Openness, and Underlying Biological Drivers among Bacillus subtilis Group
Source: Microorganisms. 2024 May 14;12(5):986. doi: 10.3390/microorganisms12050986 (PMC11124052; doi:10.3390/microorganisms12050986)
Supplement: Supplementary file 1 [file microorganisms-12-00986-s001.zip]

Archive with 4 entries (4 files):
- microorganisms-2985640-supplementary/GO_basic_Description.txt
- microorganisms-2985640-supplementary/lamda_calculate.py
- microorganisms-2985640-supplementary/supp_figureS1&S2.pdf
- microorganisms-2985640-supplementary/Supplementary_table.xlsx
