# Supplementary material for: Comparative Genomics Unveils Functional Diversity, Pangenome Openness, and Underlying Biological Drivers among Bacillus subtilis Group
Source: Microorganisms. 2024 May 14;12(5):986. doi: 10.3390/microorganisms12050986 (PMC11124052; doi:10.3390/microorganisms12050986)
Supplement: Supplementary file 1 [file microorganisms-12-00986-s001.zip › microorganisms-2985640-supplementary/GO_basic_Description.txt]

Class	GO_IDs	Description
BP	GO:0000001	mitochondrion inheritance
BP	GO:0000002	mitochondrial genome maintenance
BP	GO:0000003	reproduction
MF	GO:0000005	obsolete ribosomal chaperone activity
MF	GO:0000006	high-affinity zinc transmembrane transporter activity
MF	GO:0000007	low-affinity zinc ion transmembrane transporter activity
MF	GO:0000008	obsolete thioredoxin
MF	GO:0000009	alpha-1,6-mannosyltransferase activity
MF	GO:0000010	trans-hexaprenyltranstransferase activity
BP	GO:0000011	vacuole inheritance
BP	GO:0000012	single strand break repair
MF	GO:0000014	single-stranded DNA endodeoxyribonuclease activity
CC	GO:0000015	phosphopyruvate hydratase complex
MF	GO:0000016	lactase activity
BP	GO:0000017	alpha-glucoside transport
BP	GO:0000018	regulation of DNA recombination
BP	GO:0000019	regulation of mitotic recombination
BP	GO:0000020	obsolete negative regulation of recombination within rDNA repeats
BP	GO:0000022	mitotic spindle elongation
BP	GO:0000023	maltose metabolic process
BP	GO:0000024	maltose biosynthetic process
BP	GO:0000025	maltose catabolic process
MF	GO:0000026	alpha-1,2-mannosyltransferase activity
BP	GO:0000027	ribosomal large subunit assembly
BP	GO:0000028	ribosomal small subunit assembly
MF	GO:0000030	mannosyltransferase activity
MF	GO:0000031	mannosylphosphate transferase activity
BP	GO:0000032	cell wall mannoprotein biosynthetic process
MF	GO:0000033	alpha-1,3-mannosyltransferase activity
MF	GO:0000034	adenine deaminase activity
MF	GO:0000035	acyl binding
MF	GO:0000036	acyl carrier activity
BP	GO:0000038	very long-chain fatty acid metabolic process
MF	GO:0000039	obsolete plasma membrane long-chain fatty acid transporter
BP	GO:0000041	transition metal ion transport
BP	GO:0000044	obsolete ascorbate stabilization
BP	GO:0000045	autophagosome assembly
MF	GO:0000047	obsolete Rieske iron-sulfur protein
MF	GO:0000048	peptidyltransferase activity
MF	GO:0000049	tRNA binding
BP	GO:0000050	urea cycle
BP	GO:0000051	obsolete urea cycle intermediate metabolic process
BP	GO:0000052	citrulline metabolic process
BP	GO:0000053	argininosuccinate metabolic process
BP	GO:0000054	ribosomal subunit export from nucleus
BP	GO:0000055	ribosomal large subunit export from nucleus
BP	GO:0000056	ribosomal small subunit export from nucleus
BP	GO:0000059	obsolete protein import into nucleus, docking
BP	GO:0000060	obsolete protein import into nucleus, translocation
BP	GO:0000061	obsolete protein import into nucleus, substrate release
MF	GO:0000062	fatty-acyl-CoA binding
MF	GO:0000064	L-ornithine transmembrane transporter activity
BP	GO:0000067	obsolete DNA replication and chromosome cycle
BP	GO:0000070	mitotic sister chromatid segregation
BP	GO:0000072	obsolete M phase specific microtubule process
BP	GO:0000073	initial mitotic spindle pole body separation
BP	GO:0000075	cell cycle checkpoint signaling
BP	GO:0000076	DNA replication checkpoint signaling
BP	GO:0000077	DNA damage checkpoint signaling
BP	GO:0000078	obsolete cytokinesis after mitosis checkpoint
BP	GO:0000079	regulation of cyclin-dependent protein serine/threonine kinase activity
BP	GO:0000080	mitotic G1 phase
BP	GO:0000082	G1/S transition of mitotic cell cycle
BP	GO:0000083	obsolete regulation of transcription involved in G1/S transition of mitotic cell cycle
BP	GO:0000084	mitotic S phase
BP	GO:0000085	mitotic G2 phase
BP	GO:0000086	G2/M transition of mitotic cell cycle
BP	GO:0000087	mitotic M phase
BP	GO:0000088	mitotic prophase
BP	GO:0000089	mitotic metaphase
BP	GO:0000090	mitotic anaphase
BP	GO:0000091	mitotic anaphase A
BP	GO:0000092	mitotic anaphase B
BP	GO:0000093	mitotic telophase
BP	GO:0000094	obsolete septin assembly and septum formation
MF	GO:0000095	S-adenosyl-L-methionine transmembrane transporter activity
BP	GO:0000096	sulfur amino acid metabolic process
BP	GO:0000097	sulfur amino acid biosynthetic process
BP	GO:0000098	sulfur amino acid catabolic process
MF	GO:0000099	sulfur amino acid transmembrane transporter activity
MF	GO:0000100	S-methylmethionine transmembrane transporter activity
BP	GO:0000101	sulfur amino acid transport
MF	GO:0000102	L-methionine secondary active transmembrane transporter activity
BP	GO:0000103	sulfate assimilation
MF	GO:0000104	succinate dehydrogenase activity
BP	GO:0000105	histidine biosynthetic process
MF	GO:0000107	imidazoleglycerol-phosphate synthase activity
CC	GO:0000108	obsolete repairosome
CC	GO:0000109	nucleotide-excision repair complex
CC	GO:0000110	nucleotide-excision repair factor 1 complex
CC	GO:0000111	nucleotide-excision repair factor 2 complex
CC	GO:0000112	nucleotide-excision repair factor 3 complex
CC	GO:0000113	nucleotide-excision repair factor 4 complex
BP	GO:0000114	obsolete regulation of transcription involved in G1 phase of mitotic cell cycle
BP	GO:0000115	obsolete regulation of transcription involved in S phase of mitotic cell cycle
BP	GO:0000116	obsolete regulation of transcription involved in G2-phase of mitotic cell cycle
BP	GO:0000117	obsolete regulation of transcription involved in G2/M transition of mitotic cell cycle
CC	GO:0000118	histone deacetylase complex
CC	GO:0000120	RNA polymerase I transcription regulator complex
MF	GO:0000121	glycerol-1-phosphatase activity
BP	GO:0000122	negative regulation of transcription by RNA polymerase II
CC	GO:0000123	histone acetyltransferase complex
CC	GO:0000124	SAGA complex
CC	GO:0000126	transcription factor TFIIIB complex
CC	GO:0000127	transcription factor TFIIIC complex
BP	GO:0000128	flocculation
CC	GO:0000131	incipient cellular bud site
BP	GO:0000132	establishment of mitotic spindle orientation
CC	GO:0000133	polarisome
CC	GO:0000136	mannan polymerase complex
CC	GO:0000137	Golgi cis cisterna
CC	GO:0000138	Golgi trans cisterna
CC	GO:0000139	Golgi membrane
MF	GO:0000140	acylglycerone-phosphate reductase activity
CC	GO:0000142	cellular bud neck contractile ring
CC	GO:0000144	cellular bud neck septin ring
CC	GO:0000145	exocyst
MF	GO:0000146	microfilament motor activity
BP	GO:0000147	actin cortical patch assembly
CC	GO:0000148	1,3-beta-D-glucan synthase complex
MF	GO:0000149	SNARE binding
MF	GO:0000150	DNA strand exchange activity
CC	GO:0000151	ubiquitin ligase complex
CC	GO:0000152	nuclear ubiquitin ligase complex
CC	GO:0000153	cytoplasmic ubiquitin ligase complex
BP	GO:0000154	rRNA modification
MF	GO:0000155	phosphorelay sensor kinase activity
MF	GO:0000156	phosphorelay response regulator activity
CC	GO:0000159	protein phosphatase type 2A complex
BP	GO:0000160	phosphorelay signal transduction system
BP	GO:0000161	osmosensory signaling MAPK cascade
BP	GO:0000162	tryptophan biosynthetic process
CC	GO:0000164	protein phosphatase type 1 complex
BP	GO:0000165	MAPK cascade
MF	GO:0000166	nucleotide binding
MF	GO:0000170	sphingosine hydroxylase activity
MF	GO:0000171	ribonuclease MRP activity
CC	GO:0000172	ribonuclease MRP complex
BP	GO:0000174	obsolete inactivation of MAPK (mating sensu Saccharomyces)
MF	GO:0000175	3'-5'-RNA exonuclease activity
CC	GO:0000176	nuclear exosome (RNase complex)
CC	GO:0000177	cytoplasmic exosome (RNase complex)
CC	GO:0000178	exosome (RNase complex)
MF	GO:0000179	rRNA (adenine-N6,N6-)-dimethyltransferase activity
CC	GO:0000180	obsolete cytosolic large ribosomal subunit
CC	GO:0000181	obsolete cytosolic small ribosomal subunit
MF	GO:0000182	rDNA binding
BP	GO:0000183	rDNA heterochromatin formation
BP	GO:0000184	nuclear-transcribed mRNA catabolic process, nonsense-mediated decay
BP	GO:0000185	obsolete activation of MAPKKK activity
BP	GO:0000186	obsolete activation of MAPKK activity
BP	GO:0000187	obsolete activation of MAPK activity
BP	GO:0000188	obsolete inactivation of MAPK activity
BP	GO:0000189	obsolete MAPK import into nucleus
BP	GO:0000190	obsolete MAPKKK cascade (pseudohyphal growth)
BP	GO:0000191	obsolete activation of MAPKKK (pseudohyphal growth)
BP	GO:0000192	obsolete activation of MAPKK (pseudohyphal growth)
BP	GO:0000193	obsolete activation of MAPK (pseudohyphal growth)
BP	GO:0000194	obsolete inactivation of MAPK (pseudohyphal growth)
BP	GO:0000195	obsolete nuclear translocation of MAPK (pseudohyphal growth)
BP	GO:0000196	cell wall integrity MAPK cascade
BP	GO:0000197	obsolete activation of MAPKKK activity involved in cell wall organization or biogenesis
BP	GO:0000198	obsolete activation of MAPKK activity involved in cell wall organization or biogenesis
BP	GO:0000199	obsolete activation of MAPK activity involved in cell wall organization or biogenesis
BP	GO:0000200	obsolete inactivation of MAPK activity involved in cell wall organization or biogenesis
BP	GO:0000201	obsolete MAPK import into nucleus involved in cell wall organization or biogenesis
BP	GO:0000202	obsolete MAPKKK cascade during sporulation (sensu Saccharomyces)
BP	GO:0000203	obsolete activation of MAPKKK during sporulation (sensu Saccharomyces)
BP	GO:0000204	obsolete activation of MAPKK during sporulation (sensu Saccharomyces)
BP	GO:0000205	obsolete activation of MAPK during sporulation (sensu Saccharomyces)
BP	GO:0000206	obsolete inactivation of MAPK during sporulation (sensu Saccharomyces)
BP	GO:0000207	obsolete nuclear translocation of MAPK during sporulation (sensu Saccharomyces)
BP	GO:0000208	obsolete MAPK import into nucleus involved in osmosensory signaling pathway
BP	GO:0000209	protein polyubiquitination
MF	GO:0000210	NAD+ diphosphatase activity
MF	GO:0000211	obsolete protein degradation tagging activity
BP	GO:0000212	meiotic spindle organization
MF	GO:0000213	tRNA-intron endonuclease activity
CC	GO:0000214	tRNA-intron endonuclease complex
MF	GO:0000215	tRNA 2'-phosphotransferase activity
BP	GO:0000216	obsolete M/G1 transition of mitotic cell cycle
MF	GO:0000217	DNA secondary structure binding
CC	GO:0000219	obsolete vacuolar hydrogen-transporting ATPase
CC	GO:0000220	vacuolar proton-transporting V-type ATPase, V0 domain
CC	GO:0000221	vacuolar proton-transporting V-type ATPase, V1 domain
CC	GO:0000222	plasma membrane proton-transporting V-type ATPase, V0 domain
CC	GO:0000223	plasma membrane proton-transporting V-type ATPase, V1 domain
MF	GO:0000224	peptide-N4-(N-acetyl-beta-glucosaminyl)asparagine amidase activity
MF	GO:0000225	N-acetylglucosaminylphosphatidylinositol deacetylase activity
BP	GO:0000226	microtubule cytoskeleton organization
MF	GO:0000227	oxaloacetate secondary active transmembrane transporter activity
CC	GO:0000228	nuclear chromosome
CC	GO:0000229	obsolete cytoplasmic chromosome
CC	GO:0000230	obsolete nuclear mitotic chromosome
CC	GO:0000231	obsolete cytoplasmic mitotic chromosome
CC	GO:0000232	obsolete nuclear interphase chromosome
CC	GO:0000233	obsolete cytoplasmic interphase chromosome
MF	GO:0000234	phosphoethanolamine N-methyltransferase activity
CC	GO:0000235	astral microtubule
BP	GO:0000236	mitotic prometaphase
BP	GO:0000237	leptotene
BP	GO:0000238	zygotene
BP	GO:0000239	pachytene
BP	GO:0000240	diplotene
BP	GO:0000241	diakinesis
CC	GO:0000242	pericentriolar material
CC	GO:0000243	commitment complex
BP	GO:0000244	spliceosomal tri-snRNP complex assembly
BP	GO:0000245	spliceosomal complex assembly
MF	GO:0000246	delta24(24-1) sterol reductase activity
MF	GO:0000247	C-8 sterol isomerase activity
MF	GO:0000248	C-5 sterol desaturase activity
MF	GO:0000249	C-22 sterol desaturase activity
MF	GO:0000250	lanosterol synthase activity
MF	GO:0000252	C-3 sterol dehydrogenase (C-4 sterol decarboxylase) activity
MF	GO:0000253	3-keto sterol reductase activity
MF	GO:0000254	C-4 methylsterol oxidase activity
BP	GO:0000255	allantoin metabolic process
BP	GO:0000256	allantoin catabolic process
MF	GO:0000257	nitrilase activity
MF	GO:0000258	obsolete isoleucine/valine:sodium symporter activity
MF	GO:0000259	obsolete intracellular nucleoside transmembrane transporter activity
MF	GO:0000260	obsolete hydrogen-translocating V-type ATPase activity
MF	GO:0000261	obsolete sodium-translocating V-type ATPase activity
CC	GO:0000262	mitochondrial chromosome
MF	GO:0000263	obsolete heterotrimeric G-protein GTPase, alpha-subunit
MF	GO:0000264	obsolete heterotrimeric G-protein GTPase, beta-subunit
MF	GO:0000265	obsolete heterotrimeric G-protein GTPase, gamma-subunit
BP	GO:0000266	mitochondrial fission
CC	GO:0000267	obsolete cell fraction
MF	GO:0000268	peroxisome targeting sequence binding
MF	GO:0000269	toxin export channel activity
BP	GO:0000270	peptidoglycan metabolic process
BP	GO:0000271	polysaccharide biosynthetic process
BP	GO:0000272	polysaccharide catabolic process
CC	GO:0000274	mitochondrial proton-transporting ATP synthase, stator stalk
CC	GO:0000275	mitochondrial proton-transporting ATP synthase complex, catalytic sector F(1)
CC	GO:0000276	mitochondrial proton-transporting ATP synthase complex, coupling factor F(o)
MF	GO:0000277	[cytochrome c]-lysine N-methyltransferase activity
BP	GO:0000278	mitotic cell cycle
BP	GO:0000279	M phase
BP	GO:0000280	nuclear division
BP	GO:0000281	mitotic cytokinesis
BP	GO:0000282	cellular bud site selection
BP	GO:0000284	obsolete shmoo orientation
MF	GO:0000285	1-phosphatidylinositol-3-phosphate 5-kinase activity
MF	GO:0000286	alanine dehydrogenase activity
MF	GO:0000287	magnesium ion binding
BP	GO:0000288	nuclear-transcribed mRNA catabolic process, deadenylation-dependent decay
BP	GO:0000289	nuclear-transcribed mRNA poly(A) tail shortening
BP	GO:0000290	deadenylation-dependent decapping of nuclear-transcribed mRNA
BP	GO:0000291	nuclear-transcribed mRNA catabolic process, exonucleolytic
BP	GO:0000292	RNA fragment catabolic process
MF	GO:0000293	ferric-chelate reductase activity
BP	GO:0000294	nuclear-transcribed mRNA catabolic process, RNase MRP-dependent
MF	GO:0000295	adenine nucleotide transmembrane transporter activity
BP	GO:0000296	spermine transport
MF	GO:0000297	spermine transmembrane transporter activity
MF	GO:0000298	endopolyphosphatase activity
CC	GO:0000299	obsolete integral to membrane of membrane fraction
CC	GO:0000300	obsolete peripheral to membrane of membrane fraction
BP	GO:0000301	retrograde transport, vesicle recycling within Golgi
BP	GO:0000302	response to reactive oxygen species
BP	GO:0000303	response to superoxide
BP	GO:0000304	response to singlet oxygen
BP	GO:0000305	response to oxygen radical
CC	GO:0000306	obsolete extrinsic component of vacuolar membrane
CC	GO:0000307	cyclin-dependent protein kinase holoenzyme complex
CC	GO:0000308	cytoplasmic cyclin-dependent protein kinase holoenzyme complex
MF	GO:0000309	nicotinamide-nucleotide adenylyltransferase activity
MF	GO:0000310	xanthine phosphoribosyltransferase activity
CC	GO:0000311	plastid large ribosomal subunit
CC	GO:0000312	plastid small ribosomal subunit
CC	GO:0000313	organellar ribosome
CC	GO:0000314	organellar small ribosomal subunit
CC	GO:0000315	organellar large ribosomal subunit
BP	GO:0000316	sulfite transport
MF	GO:0000319	sulfite transmembrane transporter activity
BP	GO:0000320	re-entry into mitotic cell cycle
BP	GO:0000321	re-entry into mitotic cell cycle after pheromone arrest
CC	GO:0000322	storage vacuole
CC	GO:0000323	lytic vacuole
CC	GO:0000324	fungal-type vacuole
CC	GO:0000325	plant-type vacuole
CC	GO:0000326	protein storage vacuole
CC	GO:0000327	lytic vacuole within protein storage vacuole
CC	GO:0000328	fungal-type vacuole lumen
CC	GO:0000329	fungal-type vacuole membrane
CC	GO:0000330	plant-type vacuole lumen
CC	GO:0000331	contractile vacuole
MF	GO:0000332	template for synthesis of G-rich strand of telomere DNA activity
CC	GO:0000333	telomerase catalytic core complex
MF	GO:0000334	3-hydroxyanthranilate 3,4-dioxygenase activity
BP	GO:0000335	obsolete negative regulation of transposition, DNA-mediated
BP	GO:0000336	obsolete positive regulation of transposition, DNA-mediated
BP	GO:0000337	obsolete regulation of transposition, DNA-mediated
BP	GO:0000338	protein deneddylation
MF	GO:0000339	RNA cap binding
MF	GO:0000340	RNA 7-methylguanosine cap binding
MF	GO:0000341	RNA trimethylguanosine cap binding
MF	GO:0000342	RNA cap 4 binding
CC	GO:0000343	plastid-encoded plastid RNA polymerase complex A
CC	GO:0000344	plastid-encoded plastid RNA polymerase complex B
CC	GO:0000345	cytosolic DNA-directed RNA polymerase complex
CC	GO:0000346	transcription export complex
CC	GO:0000347	THO complex
BP	GO:0000348	mRNA branch site recognition
BP	GO:0000349	generation of catalytic spliceosome for first transesterification step
BP	GO:0000350	generation of catalytic spliceosome for second transesterification step
BP	GO:0000352	trans assembly of SL-containing precatalytic spliceosome
BP	GO:0000353	formation of quadruple SL/U4/U5/U6 snRNP
BP	GO:0000354	cis assembly of pre-catalytic spliceosome
MF	GO:0000362	obsolete first U2-type spliceosomal transesterification activity
MF	GO:0000363	obsolete first U12-type spliceosomal transesterification activity
MF	GO:0000364	obsolete second U2-type spliceosomal transesterification activity
BP	GO:0000365	mRNA trans splicing, via spliceosome
BP	GO:0000366	intergenic mRNA trans splicing
MF	GO:0000367	obsolete second U12-type spliceosomal transesterification activity
BP	GO:0000372	Group I intron splicing
BP	GO:0000373	Group II intron splicing
BP	GO:0000374	Group III intron splicing
BP	GO:0000375	RNA splicing, via transesterification reactions
BP	GO:0000376	RNA splicing, via transesterification reactions with guanosine as nucleophile
BP	GO:0000377	RNA splicing, via transesterification reactions with bulged adenosine as nucleophile
BP	GO:0000378	RNA exon ligation
BP	GO:0000379	tRNA-type intron splice site recognition and cleavage
BP	GO:0000380	alternative mRNA splicing, via spliceosome
BP	GO:0000381	regulation of alternative mRNA splicing, via spliceosome
MF	GO:0000384	first spliceosomal transesterification activity
MF	GO:0000386	second spliceosomal transesterification activity
BP	GO:0000387	spliceosomal snRNP assembly
BP	GO:0000388	spliceosome conformational change to release U4 (or U4atac) and U1 (or U11)
BP	GO:0000389	mRNA 3'-splice site recognition
BP	GO:0000390	spliceosomal complex disassembly
BP	GO:0000393	spliceosomal conformational changes to generate catalytic conformation
BP	GO:0000394	RNA splicing, via endonucleolytic cleavage and ligation
BP	GO:0000395	mRNA 5'-splice site recognition
BP	GO:0000398	mRNA splicing, via spliceosome
CC	GO:0000399	cellular bud neck septin structure
MF	GO:0000400	four-way junction DNA binding
MF	GO:0000401	open form four-way junction DNA binding
MF	GO:0000402	crossed form four-way junction DNA binding
MF	GO:0000403	Y-form DNA binding
MF	GO:0000404	heteroduplex DNA loop binding
MF	GO:0000405	bubble DNA binding
MF	GO:0000406	double-strand/single-strand DNA junction binding
CC	GO:0000407	phagophore assembly site
CC	GO:0000408	EKC/KEOPS complex
BP	GO:0000409	regulation of transcription by galactose
BP	GO:0000410	carbon catabolite repression of transcription by galactose
BP	GO:0000411	positive regulation of transcription by galactose
BP	GO:0000412	histone peptidyl-prolyl isomerization
BP	GO:0000413	protein peptidyl-prolyl isomerization
BP	GO:0000414	obsolete regulation of histone H3-K36 methylation
BP	GO:0000415	obsolete negative regulation of histone H3-K36 methylation
BP	GO:0000416	obsolete positive regulation of histone H3-K36 methylation
CC	GO:0000417	HIR complex
CC	GO:0000418	RNA polymerase IV complex
CC	GO:0000419	RNA polymerase V complex
CC	GO:0000421	autophagosome membrane
BP	GO:0000422	autophagy of mitochondrion
BP	GO:0000423	mitophagy
BP	GO:0000424	micromitophagy
BP	GO:0000425	pexophagy
BP	GO:0000426	micropexophagy
CC	GO:0000427	plastid-encoded plastid RNA polymerase complex
CC	GO:0000428	DNA-directed RNA polymerase complex
BP	GO:0000429	carbon catabolite regulation of transcription from RNA polymerase II promoter
BP	GO:0000430	regulation of transcription from RNA polymerase II promoter by glucose
BP	GO:0000431	regulation of transcription from RNA polymerase II promoter by galactose
BP	GO:0000432	positive regulation of transcription from RNA polymerase II promoter by glucose
BP	GO:0000433	carbon catabolite repression of transcription from RNA polymerase II promoter by glucose
BP	GO:0000434	carbon catabolite repression of transcription from RNA polymerase II promoter by galactose
BP	GO:0000435	positive regulation of transcription from RNA polymerase II promoter by galactose
BP	GO:0000436	carbon catabolite activation of transcription from RNA polymerase II promoter
BP	GO:0000437	carbon catabolite repression of transcription from RNA polymerase II promoter
CC	GO:0000438	core TFIIH complex portion of holo TFIIH complex
CC	GO:0000439	transcription factor TFIIH core complex
CC	GO:0000440	core TFIIH complex portion of NEF3 complex
CC	GO:0000444	MIS12/MIND type complex
CC	GO:0000445	THO complex part of transcription export complex
CC	GO:0000446	nucleoplasmic THO complex
BP	GO:0000447	endonucleolytic cleavage in ITS1 to separate SSU-rRNA from 5.8S rRNA and LSU-rRNA from tricistronic rRNA transcript (SSU-rRNA, 5.8S rRNA, LSU-rRNA)
BP	GO:0000448	cleavage in ITS2 between 5.8S rRNA and LSU-rRNA of tricistronic rRNA transcript (SSU-rRNA, 5.8S rRNA, LSU-rRNA)
BP	GO:0000449	endonucleolytic cleavage of tricistronic rRNA transcript (SSU-rRNA, LSU-rRNA, 5S)
BP	GO:0000450	cleavage of bicistronic rRNA transcript (SSU-rRNA, LSU-rRNA)
BP	GO:0000451	rRNA 2'-O-methylation
BP	GO:0000452	snoRNA guided rRNA 2'-O-methylation
BP	GO:0000453	obsolete enzyme-directed rRNA 2'-O-methylation
BP	GO:0000454	snoRNA guided rRNA pseudouridine synthesis
BP	GO:0000455	enzyme-directed rRNA pseudouridine synthesis
BP	GO:0000456	obsolete dimethylation involved in SSU-rRNA maturation
BP	GO:0000457	endonucleolytic cleavage between SSU-rRNA and LSU-rRNA of tricistronic rRNA transcript (SSU-rRNA, LSU-rRNA, 5S)
BP	GO:0000458	endonucleolytic cleavage between LSU-rRNA and 5S rRNA of tricistronic rRNA transcript (SSU-rRNA, LSU-rRNA, 5S)
BP	GO:0000459	obsolete exonucleolytic trimming involved in rRNA processing
BP	GO:0000460	maturation of 5.8S rRNA
BP	GO:0000461	endonucleolytic cleavage to generate mature 3'-end of SSU-rRNA from (SSU-rRNA, 5.8S rRNA, LSU-rRNA)
BP	GO:0000462	maturation of SSU-rRNA from tricistronic rRNA transcript (SSU-rRNA, 5.8S rRNA, LSU-rRNA)
BP	GO:0000463	maturation of LSU-rRNA from tricistronic rRNA transcript (SSU-rRNA, 5.8S rRNA, LSU-rRNA)
BP	GO:0000464	endonucleolytic cleavage in ITS1 upstream of 5.8S rRNA from tricistronic rRNA transcript (SSU-rRNA, 5.8S rRNA, LSU-rRNA)
BP	GO:0000465	exonucleolytic trimming to generate mature 5'-end of 5.8S rRNA from tricistronic rRNA transcript (SSU-rRNA, 5.8S rRNA, LSU-rRNA)
BP	GO:0000466	maturation of 5.8S rRNA from tricistronic rRNA transcript (SSU-rRNA, 5.8S rRNA, LSU-rRNA)
BP	GO:0000467	exonucleolytic trimming to generate mature 3'-end of 5.8S rRNA from tricistronic rRNA transcript (SSU-rRNA, 5.8S rRNA, LSU-rRNA)
BP	GO:0000468	generation of mature 3'-end of LSU-rRNA from tricistronic rRNA transcript (SSU-rRNA, 5.8S rRNA, LSU-rRNA)
BP	GO:0000469	obsolete cleavage involved in rRNA processing
BP	GO:0000470	maturation of LSU-rRNA
BP	GO:0000471	endonucleolytic cleavage in 3'-ETS of tricistronic rRNA transcript (SSU-rRNA, 5.8S rRNA, LSU-rRNA)
BP	GO:0000472	endonucleolytic cleavage to generate mature 5'-end of SSU-rRNA from (SSU-rRNA, 5.8S rRNA, LSU-rRNA)
BP	GO:0000473	maturation of LSU-rRNA from tetracistronic rRNA transcript (SSU-rRNA, 5.8S rRNA, 2S rRNA, LSU-rRNA)
BP	GO:0000474	maturation of SSU-rRNA from tetracistronic rRNA transcript (SSU-rRNA, 5.8S rRNA, 2S rRNA, LSU-rRNA)
BP	GO:0000475	maturation of 2S rRNA
BP	GO:0000476	maturation of 4.5S rRNA
BP	GO:0000477	generation of mature 5'-end of LSU-rRNA from tricistronic rRNA transcript (SSU-rRNA, 5.8S rRNA, LSU-rRNA)
BP	GO:0000478	obsolete endonucleolytic cleavage involved in rRNA processing
BP	GO:0000479	endonucleolytic cleavage of tricistronic rRNA transcript (SSU-rRNA, 5.8S rRNA, LSU-rRNA)
BP	GO:0000480	endonucleolytic cleavage in 5'-ETS of tricistronic rRNA transcript (SSU-rRNA, 5.8S rRNA, LSU-rRNA)
BP	GO:0000481	maturation of 5S rRNA
BP	GO:0000482	maturation of 5S rRNA from tetracistronic rRNA transcript (SSU-rRNA, 5.8S rRNA, LSU-rRNA)
BP	GO:0000483	endonucleolytic cleavage of tetracistronic rRNA transcript (SSU-rRNA, 5.8S rRNA, 2S rRNA, LSU-rRNA)
BP	GO:0000484	cleavage between SSU-rRNA and 5.8S rRNA of tetracistronic rRNA transcript (SSU-rRNA, 5.8S rRNA, 2S rRNA, LSU-rRNA)
BP	GO:0000485	cleavage between 2S rRNA and LSU-rRNA of tetracistronic rRNA transcript (SSU-rRNA, 5.8S rRNA, 2S rRNA, LSU-rRNA)
BP	GO:0000486	cleavage between 5.8S rRNA and 2S rRNA of tetracistronic rRNA transcript (SSU-rRNA, 5.8S rRNA, 2S rRNA, LSU-rRNA)
BP	GO:0000487	maturation of 5.8S rRNA from tetracistronic rRNA transcript (SSU-rRNA, 5.8S rRNA, 2S rRNA, LSU-rRNA)
BP	GO:0000488	maturation of LSU-rRNA from tetracistronic rRNA transcript (SSU-rRNA, LSU-rRNA, 4.5S-rRNA, 5S-rRNA)
BP	GO:0000489	maturation of SSU-rRNA from tetracistronic rRNA transcript (SSU-rRNA, LSU-rRNA, 4.5S-rRNA, 5S-rRNA)
BP	GO:0000491	small nucleolar ribonucleoprotein complex assembly
BP	GO:0000492	box C/D snoRNP assembly
BP	GO:0000493	box H/ACA snoRNP assembly
BP	GO:0000494	box C/D RNA 3'-end processing
BP	GO:0000495	box H/ACA RNA 3'-end processing
MF	GO:0000497	DNA template activity
CC	GO:0000500	RNA polymerase I upstream activating factor complex
CC	GO:0000502	proteasome complex
CC	GO:0000504	obsolete proteasome regulatory particle (sensu Bacteria)
CC	GO:0000506	glycosylphosphatidylinositol-N-acetylglucosaminyltransferase (GPI-GnT) complex
MF	GO:0000510	H3-H4 histone complex chaperone activity
MF	GO:0000511	H2A-H2B histone complex chaperone activity
BP	GO:0000512	lncRNA-mediated post-transcriptional gene silencing
MF	GO:0000513	actin severing activator activity
MF	GO:0000514	3-sulfino-L-alanine: proton, glutamate antiporter activity
MF	GO:0000515	aspartate:glutamate, proton antiporter activity
BP	GO:0000578	embryonic axis specification
MF	GO:0000700	mismatch base pair DNA N-glycosylase activity
MF	GO:0000701	purine-specific mismatch base pair DNA N-glycosylase activity
MF	GO:0000702	oxidized base lesion DNA N-glycosylase activity
MF	GO:0000703	oxidized pyrimidine nucleobase lesion DNA N-glycosylase activity
MF	GO:0000704	pyrimidine dimer DNA N-glycosylase activity
BP	GO:0000705	achiasmate meiosis I
BP	GO:0000706	meiotic DNA double-strand break processing
BP	GO:0000707	meiotic DNA recombinase assembly
BP	GO:0000708	meiotic strand invasion
BP	GO:0000709	meiotic joint molecule formation
BP	GO:0000710	meiotic mismatch repair
BP	GO:0000711	meiotic DNA repair synthesis
BP	GO:0000712	resolution of meiotic recombination intermediates
BP	GO:0000713	meiotic heteroduplex formation
BP	GO:0000714	meiotic strand displacement
BP	GO:0000715	nucleotide-excision repair, DNA damage recognition
BP	GO:0000716	transcription-coupled nucleotide-excision repair, DNA damage recognition
BP	GO:0000717	nucleotide-excision repair, DNA duplex unwinding
BP	GO:0000718	nucleotide-excision repair, DNA damage removal
BP	GO:0000719	photoreactive repair
BP	GO:0000720	pyrimidine dimer repair by nucleotide-excision repair
MF	GO:0000721	(R,R)-butanediol dehydrogenase activity
BP	GO:0000722	telomere maintenance via recombination
BP	GO:0000723	telomere maintenance
BP	GO:0000724	double-strand break repair via homologous recombination
BP	GO:0000725	recombinational repair
BP	GO:0000726	obsolete non-recombinational repair
BP	GO:0000727	double-strand break repair via break-induced replication
BP	GO:0000729	DNA double-strand break processing
BP	GO:0000730	DNA recombinase assembly
BP	GO:0000731	DNA synthesis involved in DNA repair
BP	GO:0000732	DNA strand displacement
BP	GO:0000733	obsolete DNA strand renaturation
BP	GO:0000735	removal of nonhomologous ends
BP	GO:0000736	double-strand break repair via single-strand annealing, removal of nonhomologous ends
BP	GO:0000737	obsolete DNA catabolic process, endonucleolytic
BP	GO:0000738	obsolete DNA catabolic process, exonucleolytic
MF	GO:0000739	obsolete DNA strand annealing activity
BP	GO:0000740	nuclear membrane fusion
BP	GO:0000741	karyogamy
BP	GO:0000742	karyogamy involved in conjugation with cellular fusion
BP	GO:0000743	nuclear migration involved in conjugation with cellular fusion
BP	GO:0000744	karyogamy involved in conjugation with mutual genetic exchange
BP	GO:0000745	nuclear migration involved in conjugation with mutual genetic exchange
BP	GO:0000746	obsolete conjugation
BP	GO:0000747	conjugation with cellular fusion
BP	GO:0000748	conjugation with mutual genetic exchange
BP	GO:0000749	response to pheromone triggering conjugation with cellular fusion
BP	GO:0000750	pheromone-dependent signal transduction involved in conjugation with cellular fusion
BP	GO:0000751	mitotic cell cycle G1 arrest in response to pheromone
BP	GO:0000752	agglutination involved in conjugation with cellular fusion
BP	GO:0000753	cell morphogenesis involved in conjugation with cellular fusion
BP	GO:0000754	adaptation of signaling pathway by response to pheromone involved in conjugation with cellular fusion
BP	GO:0000755	cytogamy
BP	GO:0000756	response to pheromone regulating conjugation with mutual genetic exchange
BP	GO:0000757	obsolete signal transduction involved in regulation of conjugation with mutual genetic exchange
BP	GO:0000758	agglutination involved in conjugation with mutual genetic exchange
BP	GO:0000759	obsolete cell morphogenesis involved in conjugation with mutual genetic exchange
BP	GO:0000760	adaptation to pheromone regulating conjugation with mutual genetic exchange
BP	GO:0000761	conjugant formation
BP	GO:0000762	pheromone-induced unidirectional conjugation
BP	GO:0000763	obsolete cell morphogenesis involved in unidirectional conjugation
BP	GO:0000764	obsolete cellular morphogenesis involved in pheromone-induced unidirectional conjugation
BP	GO:0000765	response to pheromone regulating pheromone-induced unidirectional conjugation
BP	GO:0000766	negative adaptation of signaling pathway by response to pheromone involved in pheromone-induced unidirectional conjugation
BP	GO:0000767	obsolete cell morphogenesis involved in conjugation
BP	GO:0000768	syncytium formation by plasma membrane fusion
BP	GO:0000769	syncytium formation by mitosis without cytokinesis
BP	GO:0000770	peptide pheromone export
BP	GO:0000771	obsolete agglutination involved in conjugation
MF	GO:0000772	mating pheromone activity
MF	GO:0000773	phosphatidyl-N-methylethanolamine N-methyltransferase activity
MF	GO:0000774	adenyl-nucleotide exchange factor activity
CC	GO:0000775	chromosome, centromeric region
CC	GO:0000776	kinetochore
CC	GO:0000779	condensed chromosome, centromeric region
CC	GO:0000781	chromosome, telomeric region
CC	GO:0000782	telomere cap complex
CC	GO:0000783	nuclear telomere cap complex
CC	GO:0000785	chromatin
CC	GO:0000786	nucleosome
CC	GO:0000791	euchromatin
CC	GO:0000792	heterochromatin
CC	GO:0000793	condensed chromosome
CC	GO:0000794	condensed nuclear chromosome
CC	GO:0000795	synaptonemal complex
CC	GO:0000796	condensin complex
CC	GO:0000800	lateral element
CC	GO:0000801	central element
CC	GO:0000802	transverse filament
CC	GO:0000803	sex chromosome
CC	GO:0000804	W chromosome
CC	GO:0000805	X chromosome
CC	GO:0000806	Y chromosome
CC	GO:0000807	Z chromosome
CC	GO:0000808	origin recognition complex
CC	GO:0000809	cytoplasmic origin of replication recognition complex
MF	GO:0000810	diacylglycerol diphosphate phosphatase activity
CC	GO:0000811	GINS complex
CC	GO:0000812	Swr1 complex
CC	GO:0000813	ESCRT I complex
CC	GO:0000814	ESCRT II complex
CC	GO:0000815	ESCRT III complex
CC	GO:0000817	COMA complex
BP	GO:0000819	sister chromatid segregation
BP	GO:0000820	regulation of glutamine family amino acid metabolic process
BP	GO:0000821	regulation of arginine metabolic process
MF	GO:0000822	inositol hexakisphosphate binding
MF	GO:0000823	inositol-1,4,5-trisphosphate 6-kinase activity
MF	GO:0000824	inositol tetrakisphosphate 3-kinase activity
MF	GO:0000825	inositol tetrakisphosphate 6-kinase activity
MF	GO:0000826	obsolete inositol pyrophosphate synthase activity
MF	GO:0000827	inositol-1,3,4,5,6-pentakisphosphate kinase activity
MF	GO:0000828	inositol hexakisphosphate kinase activity
MF	GO:0000829	inositol heptakisphosphate kinase activity
MF	GO:0000830	inositol hexakisphosphate 4-kinase activity
MF	GO:0000831	inositol hexakisphosphate 6-kinase activity
MF	GO:0000832	inositol hexakisphosphate 5-kinase activity
MF	GO:0000833	inositol heptakisphosphate 4-kinase activity
MF	GO:0000834	inositol heptakisphosphate 6-kinase activity
CC	GO:0000835	ER ubiquitin ligase complex
CC	GO:0000836	Hrd1p ubiquitin ligase complex
CC	GO:0000837	Doa10p ubiquitin ligase complex
CC	GO:0000838	Hrd1p ubiquitin ligase ERAD-M complex
CC	GO:0000839	Hrd1p ubiquitin ligase ERAD-L complex
MF	GO:0000900	mRNA regulatory element binding translation repressor activity
MF	GO:0000901	translation repressor activity, non-nucleic acid binding
BP	GO:0000902	cell morphogenesis
BP	GO:0000903	obsolete regulation of cell shape during vegetative growth phase
BP	GO:0000904	obsolete cell morphogenesis involved in differentiation
BP	GO:0000905	sporocarp development involved in asexual reproduction
MF	GO:0000906	6,7-dimethyl-8-ribityllumazine synthase activity
MF	GO:0000907	sulfonate dioxygenase activity
MF	GO:0000908	taurine dioxygenase activity
BP	GO:0000909	sporocarp development involved in sexual reproduction
BP	GO:0000910	cytokinesis
BP	GO:0000911	cytokinesis by cell plate formation
BP	GO:0000912	assembly of actomyosin apparatus involved in cytokinesis
BP	GO:0000913	preprophase band assembly
BP	GO:0000914	phragmoplast assembly
BP	GO:0000915	actomyosin contractile ring assembly
BP	GO:0000916	actomyosin contractile ring contraction
BP	GO:0000917	division septum assembly
BP	GO:0000918	division septum site selection
BP	GO:0000919	cell plate assembly
BP	GO:0000920	septum digestion after cytokinesis
BP	GO:0000921	septin ring assembly
CC	GO:0000922	spindle pole
CC	GO:0000923	equatorial microtubule organizing center
CC	GO:0000930	gamma-tubulin complex
CC	GO:0000931	gamma-tubulin ring complex
CC	GO:0000932	P-body
CC	GO:0000933	adventitious septum
CC	GO:0000934	porous cell septum
CC	GO:0000935	division septum
CC	GO:0000936	primary cell septum
CC	GO:0000937	dolipore septum
CC	GO:0000938	GARP complex
CC	GO:0000939	inner kinetochore
CC	GO:0000940	outer kinetochore
CC	GO:0000943	retrotransposon nucleocapsid
BP	GO:0000947	amino acid catabolic process to alcohol via Ehrlich pathway
BP	GO:0000948	amino acid catabolic process to carboxylic acid via Ehrlich pathway
BP	GO:0000949	aromatic amino acid family catabolic process to alcohol via Ehrlich pathway
BP	GO:0000950	branched-chain amino acid catabolic process to alcohol via Ehrlich pathway
BP	GO:0000951	methionine catabolic process to 3-methylthiopropanol
BP	GO:0000952	aromatic amino acid family catabolic process to carboxylic acid via Ehrlich pathway
BP	GO:0000953	branched-chain amino acid catabolic process to carboxylic acid via Ehrlich pathway
BP	GO:0000954	methionine catabolic process to 3-methylthiopropanoate
BP	GO:0000955	amino acid catabolic process via Ehrlich pathway
BP	GO:0000956	nuclear-transcribed mRNA catabolic process
BP	GO:0000957	mitochondrial RNA catabolic process
BP	GO:0000958	mitochondrial mRNA catabolic process
BP	GO:0000959	mitochondrial RNA metabolic process
BP	GO:0000960	regulation of mitochondrial RNA catabolic process
BP	GO:0000961	negative regulation of mitochondrial RNA catabolic process
BP	GO:0000962	positive regulation of mitochondrial RNA catabolic process
BP	GO:0000963	mitochondrial RNA processing
BP	GO:0000964	mitochondrial RNA 5'-end processing
BP	GO:0000965	mitochondrial RNA 3'-end processing
BP	GO:0000966	RNA 5'-end processing
BP	GO:0000967	rRNA 5'-end processing
BP	GO:0000968	tRNA exon ligation
BP	GO:0000969	tRNA exon ligation utilizing ATP as source of linkage phosphate
BP	GO:0000970	tRNA exon ligation utilizing GTP as source of linkage phosphate
BP	GO:0000971	tRNA exon ligation utilizing 2',3' cyclic phosphate of 5'-exon as source of linkage phosphate
BP	GO:0000972	transcription-dependent tethering of RNA polymerase II gene DNA at nuclear periphery
BP	GO:0000973	post-transcriptional tethering of RNA polymerase II gene DNA at nuclear periphery
CC	GO:0000974	Prp19 complex
MF	GO:0000976	transcription cis-regulatory region binding
MF	GO:0000977	RNA polymerase II transcription regulatory region sequence-specific DNA binding
MF	GO:0000978	RNA polymerase II cis-regulatory region sequence-specific DNA binding
MF	GO:0000979	RNA polymerase II core promoter sequence-specific DNA binding
MF	GO:0000981	DNA-binding transcription factor activity, RNA polymerase II-specific
MF	GO:0000987	cis-regulatory region sequence-specific DNA binding
MF	GO:0000988	obsolete transcription factor activity, protein binding
MF	GO:0000989	obsolete transcription factor activity, transcription factor binding
MF	GO:0000990	obsolete transcription factor activity, core RNA polymerase binding
MF	GO:0000991	obsolete transcription factor activity, core RNA polymerase II binding
MF	GO:0000992	RNA polymerase III cis-regulatory region sequence-specific DNA binding
MF	GO:0000993	RNA polymerase II complex binding
MF	GO:0000994	RNA polymerase III core binding
MF	GO:0000995	RNA polymerase III general transcription initiation factor activity
MF	GO:0001000	bacterial-type RNA polymerase core enzyme binding
MF	GO:0001001	mitochondrial single-subunit type RNA polymerase binding
MF	GO:0001002	RNA polymerase III type 1 promoter sequence-specific DNA binding
MF	GO:0001003	RNA polymerase III type 2 promoter sequence-specific DNA binding
MF	GO:0001004	obsolete RNA polymerase III transcription regulator recruiting activity
MF	GO:0001006	RNA polymerase III type 3 promoter sequence-specific DNA binding
MF	GO:0001007	obsolete transcription factor activity, RNA polymerase III transcription factor binding
MF	GO:0001010	RNA polymerase II sequence-specific DNA-binding transcription factor recruiting activity
MF	GO:0001011	obsolete transcription factor activity, sequence-specific DNA binding, RNA polymerase recruiting
BP	GO:0001014	snoRNA transcription by RNA polymerase III
BP	GO:0001015	snoRNA transcription by RNA polymerase II
MF	GO:0001016	RNA polymerase III transcription regulatory region sequence-specific DNA binding
MF	GO:0001018	mitochondrial promoter sequence-specific DNA binding
MF	GO:0001019	plastid promoter transcription regulatory region sequence-specific DNA binding
MF	GO:0001025	RNA polymerase III general transcription initiation factor binding
MF	GO:0001026	obsolete TFIIIB-type transcription factor activity
MF	GO:0001027	obsolete RNA polymerase III type 1 promoter TFIIIB-type transcription factor activity
MF	GO:0001028	obsolete RNA polymerase III type 2 promoter TFIIIB-type transcription factor activity
MF	GO:0001029	obsolete RNA polymerase III type 3 promoter TFIIIB-type transcription factor activity
MF	GO:0001039	RNA polymerase III hybrid type promoter sequence-specific DNA binding
MF	GO:0001040	obsolete RNA polymerase III hybrid type promoter TFIIIB-type transcription factor activity
MF	GO:0001042	RNA polymerase I core binding
MF	GO:0001046	core promoter sequence-specific DNA binding
MF	GO:0001048	RNA polymerase IV core binding
MF	GO:0001049	RNA polymerase V core binding
MF	GO:0001050	single-subunit type RNA polymerase binding
MF	GO:0001051	plastid single-subunit type RNA polymerase binding
MF	GO:0001052	plastid PEP RNA polymerase core enzyme binding
MF	GO:0001054	RNA polymerase I activity
MF	GO:0001055	RNA polymerase II activity
MF	GO:0001056	RNA polymerase III activity
MF	GO:0001057	RNA polymerase IV activity
MF	GO:0001058	RNA polymerase V activity
BP	GO:0001059	transcription by RNA polymerase IV
BP	GO:0001060	transcription by RNA polymerase V
MF	GO:0001061	obsolete bacterial-type RNA polymerase activity
MF	GO:0001062	obsolete plastid PEP-A RNA polymerase activity
MF	GO:0001063	obsolete plastid PEP-B RNA polymerase activity
MF	GO:0001064	single subunit type RNA polymerase activity
MF	GO:0001065	mitochondrial single subunit type RNA polymerase activity
MF	GO:0001066	plastid single subunit type RNA polymerase activity
MF	GO:0001067	transcription regulatory region nucleic acid binding
MF	GO:0001068	transcription regulatory region RNA binding
MF	GO:0001069	regulatory region RNA binding
MF	GO:0001070	RNA-binding transcription regulator activity
MF	GO:0001072	transcription antitermination factor activity, RNA binding
MF	GO:0001073	transcription antitermination factor activity, DNA binding
MF	GO:0001074	obsolete transcription factor activity, RNA polymerase II proximal promoter sequence-specific DNA binding involved in preinitiation complex assembly
MF	GO:0001076	obsolete transcription factor activity, RNA polymerase II transcription factor binding
BP	GO:0001079	nitrogen catabolite regulation of transcription from RNA polymerase II promoter
BP	GO:0001080	nitrogen catabolite activation of transcription from RNA polymerase II promoter
BP	GO:0001081	nitrogen catabolite repression of transcription from RNA polymerase II promoter
MF	GO:0001082	obsolete transcription factor activity, RNA polymerase I transcription factor binding
MF	GO:0001083	obsolete transcription factor activity, RNA polymerase II basal transcription factor binding
MF	GO:0001084	obsolete transcription factor activity, TFIID-class binding
MF	GO:0001086	obsolete transcription factor activity, TFIIA-class binding
MF	GO:0001087	obsolete transcription factor activity, TFIIB-class binding
MF	GO:0001088	obsolete transcription factor activity, TFIIE-class binding
MF	GO:0001089	obsolete transcription factor activity, TFIIF-class transcription factor binding
MF	GO:0001090	obsolete transcription factor activity, TFIIH-class binding
MF	GO:0001091	RNA polymerase II general transcription initiation factor binding
MF	GO:0001092	TFIIA-class transcription factor complex binding
MF	GO:0001093	TFIIB-class transcription factor binding
MF	GO:0001094	TFIID-class transcription factor complex binding
MF	GO:0001095	TFIIE-class transcription factor complex binding
MF	GO:0001096	TFIIF-class transcription factor complex binding
MF	GO:0001097	TFIIH-class transcription factor complex binding
MF	GO:0001098	basal transcription machinery binding
MF	GO:0001099	basal RNA polymerase II transcription machinery binding
BP	GO:0001100	negative regulation of exit from mitosis
BP	GO:0001101	response to acid chemical
MF	GO:0001108	bacterial-type RNA polymerase holo enzyme binding
BP	GO:0001109	promoter clearance during DNA-templated transcription
BP	GO:0001110	RNA polymerase III promoter clearance
BP	GO:0001111	RNA polymerase II promoter clearance
BP	GO:0001112	DNA-templated transcription open complex formation
BP	GO:0001113	transcription open complex formation at RNA polymerase II promoter
CC	GO:0001114	protein-DNA-RNA complex
BP	GO:0001115	protein-DNA-RNA complex organization
BP	GO:0001116	protein-DNA-RNA complex assembly
BP	GO:0001117	protein-DNA-RNA complex disassembly
BP	GO:0001118	transcription ternary complex disassembly
BP	GO:0001119	protein-DNA-RNA complex remodeling
BP	GO:0001120	protein-DNA complex remodeling
MF	GO:0001128	obsolete RNA polymerase II transcription coactivator activity involved in preinitiation complex assembly
MF	GO:0001129	obsolete RNA polymerase II transcription factor activity, TBP-class protein binding, involved in preinitiation complex assembly
MF	GO:0001132	obsolete RNA polymerase II transcription factor activity, TBP-class protein binding
MF	GO:0001134	obsolete transcription regulator recruiting activity
MF	GO:0001135	obsolete RNA polymerase II transcription regulator recruiting activity
MF	GO:0001139	RNA polymerase II complex recruiting activity
MF	GO:0001147	transcription termination site sequence-specific DNA binding
MF	GO:0001149	obsolete transcription factor activity, bacterial-type RNA polymerase termination site sequence-specific binding
MF	GO:0001152	obsolete transcription factor activity, RNA polymerase III type 1 promoter sequence-specific binding, TFIIIC recruiting
MF	GO:0001153	obsolete transcription factor activity, RNA polymerase III transcription factor recruiting
MF	GO:0001154	TFIIIB-class transcription factor complex binding
MF	GO:0001155	TFIIIA-class transcription factor binding
MF	GO:0001156	TFIIIC-class transcription factor complex binding
MF	GO:0001161	intronic transcription regulatory region sequence-specific DNA binding
MF	GO:0001162	RNA polymerase II intronic transcription regulatory region sequence-specific DNA binding
MF	GO:0001163	RNA polymerase I transcription regulatory region sequence-specific DNA binding
MF	GO:0001164	RNA polymerase I core promoter sequence-specific DNA binding
MF	GO:0001165	RNA polymerase I cis-regulatory region sequence-specific DNA binding
MF	GO:0001167	obsolete RNA polymerase I transcription factor activity, sequence-specific DNA binding
MF	GO:0001168	obsolete transcription factor activity, RNA polymerase I upstream control element sequence-specific binding
MF	GO:0001169	obsolete transcription factor activity, RNA polymerase I CORE element sequence-specific binding
MF	GO:0001170	obsolete transcription factor activity, RNA polymerase I enhancer sequence-specific binding
BP	GO:0001171	reverse transcription
BP	GO:0001172	RNA-templated transcription
BP	GO:0001173	DNA-templated transcriptional start site selection
BP	GO:0001174	transcriptional start site selection at RNA polymerase II promoter
BP	GO:0001175	transcriptional start site selection at RNA polymerase III promoter
BP	GO:0001177	regulation of transcription open complex formation at RNA polymerase II promoter
BP	GO:0001178	regulation of transcriptional start site selection at RNA polymerase II promoter
MF	GO:0001179	RNA polymerase I general transcription initiation factor binding
MF	GO:0001181	RNA polymerase I general transcription initiation factor activity
BP	GO:0001182	RNA polymerase I promoter clearance
MF	GO:0001186	obsolete RNA polymerase I transcription regulator recruiting activity
BP	GO:0001188	RNA polymerase I preinitiation complex assembly
MF	GO:0001190	obsolete transcriptional activator activity, RNA polymerase II transcription factor binding
MF	GO:0001191	obsolete transcriptional repressor activity, RNA polymerase II transcription factor binding
BP	GO:0001192	maintenance of transcriptional fidelity during transcription elongation
BP	GO:0001193	maintenance of transcriptional fidelity during transcription elongation by RNA polymerase II
BP	GO:0001195	maintenance of transcriptional fidelity during transcription elongation by RNA polymerase III
BP	GO:0001196	obsolete regulation of mating-type specific transcription from RNA polymerase II promoter
BP	GO:0001197	obsolete positive regulation of mating-type specific transcription from RNA polymerase II promoter
BP	GO:0001198	obsolete negative regulation of mating-type specific transcription from RNA polymerase II promoter
BP	GO:0001207	obsolete histone displacement
BP	GO:0001208	obsolete histone H2A-H2B dimer displacement
MF	GO:0001216	DNA-binding transcription activator activity
MF	GO:0001217	DNA-binding transcription repressor activity
MF	GO:0001221	transcription coregulator binding
MF	GO:0001222	transcription corepressor binding
MF	GO:0001223	transcription coactivator binding
MF	GO:0001227	DNA-binding transcription repressor activity, RNA polymerase II-specific
MF	GO:0001228	DNA-binding transcription activator activity, RNA polymerase II-specific
BP	GO:0001300	obsolete chronological cell aging
BP	GO:0001301	obsolete progressive alteration of chromatin involved in cell aging
BP	GO:0001302	obsolete replicative cell aging
BP	GO:0001303	obsolete nucleolar fragmentation involved in replicative aging
BP	GO:0001304	obsolete progressive alteration of chromatin involved in replicative cell aging
BP	GO:0001305	obsolete progressive alteration of chromatin involved in chronological cell aging
BP	GO:0001306	obsolete age-dependent response to oxidative stress
BP	GO:0001307	obsolete extrachromosomal circular DNA accumulation involved in replicative cell aging
BP	GO:0001308	obsolete negative regulation of chromatin silencing involved in replicative cell aging
BP	GO:0001309	obsolete age-dependent telomere shortening
BP	GO:0001310	obsolete extrachromosomal rDNA circle accumulation involved in replicative cell aging
BP	GO:0001311	obsolete formation of extrachromosomal circular rDNA by homologous recombination involved in replicative cell aging
BP	GO:0001312	obsolete replication of extrachromosomal rDNA circles involved in replicative cell aging
BP	GO:0001313	obsolete formation of extrachromosomal circular DNA involved in replicative cell aging
BP	GO:0001314	obsolete replication of extrachromosomal circular DNA involved in replicative cell aging
BP	GO:0001315	obsolete age-dependent response to reactive oxygen species
BP	GO:0001316	obsolete age-dependent response to reactive oxygen species involved in replicative cell aging
BP	GO:0001317	obsolete accumulation of oxidatively modified proteins involved in replicative cell aging
BP	GO:0001318	obsolete formation of oxidatively modified proteins involved in replicative cell aging
BP	GO:0001319	obsolete inheritance of oxidatively modified proteins involved in replicative cell aging
BP	GO:0001320	obsolete age-dependent response to reactive oxygen species involved in chronological cell aging
BP	GO:0001321	obsolete age-dependent general metabolic decline involved in replicative cell aging
BP	GO:0001322	obsolete age-dependent response to oxidative stress involved in replicative cell aging
BP	GO:0001323	obsolete age-dependent general metabolic decline involved in chronological cell aging
BP	GO:0001324	obsolete age-dependent response to oxidative stress involved in chronological cell aging
BP	GO:0001325	formation of extrachromosomal circular DNA
BP	GO:0001326	replication of extrachromosomal circular DNA
CC	GO:0001400	mating projection base
CC	GO:0001401	SAM complex
BP	GO:0001402	signal transduction involved in filamentous growth
BP	GO:0001403	invasive growth in response to glucose limitation
BP	GO:0001404	obsolete invasive growth
CC	GO:0001405	PAM complex, Tim23 associated import motor
MF	GO:0001406	glycerophosphodiester transmembrane transporter activity
BP	GO:0001407	glycerophosphodiester transmembrane transport
BP	GO:0001408	guanine nucleotide transport
MF	GO:0001409	guanine nucleotide transmembrane transporter activity
BP	GO:0001410	chlamydospore formation
CC	GO:0001411	hyphal tip
BP	GO:0001501	skeletal system development
BP	GO:0001502	cartilage condensation
BP	GO:0001503	ossification
BP	GO:0001504	neurotransmitter uptake
BP	GO:0001505	obsolete regulation of neurotransmitter levels
BP	GO:0001506	obsolete neurotransmitter biosynthetic process and storage
BP	GO:0001507	acetylcholine catabolic process in synaptic cleft
BP	GO:0001508	action potential
MF	GO:0001509	obsolete legumain activity
BP	GO:0001510	RNA methylation
MF	GO:0001511	obsolete fibrillin
MF	GO:0001512	dihydronicotinamide riboside quinone reductase activity
BP	GO:0001514	selenocysteine incorporation
MF	GO:0001515	opioid peptide activity
BP	GO:0001516	prostaglandin biosynthetic process
MF	GO:0001517	N-acetylglucosamine 6-O-sulfotransferase activity
CC	GO:0001518	voltage-gated sodium channel complex
BP	GO:0001519	peptide amidation
CC	GO:0001520	outer dense fiber
BP	GO:0001522	pseudouridine synthesis
BP	GO:0001523	retinoid metabolic process
MF	GO:0001524	obsolete globin
BP	GO:0001525	angiogenesis
BP	GO:0001526	obsolete proteoglycan sulfate transfer
CC	GO:0001527	microfibril
MF	GO:0001528	obsolete elastin
CC	GO:0001529	obsolete elastin
MF	GO:0001530	lipopolysaccharide binding
MF	GO:0001531	interleukin-21 receptor binding
MF	GO:0001532	interleukin-21 receptor activity
CC	GO:0001533	cornified envelope
CC	GO:0001534	radial spoke
CC	GO:0001535	radial spoke head
CC	GO:0001536	radial spoke stalk
MF	GO:0001537	N-acetylgalactosamine 4-O-sulfotransferase activity
BP	GO:0001539	cilium or flagellum-dependent cell motility
MF	GO:0001540	amyloid-beta binding
BP	GO:0001541	ovarian follicle development
BP	GO:0001542	ovulation from ovarian follicle
BP	GO:0001543	ovarian follicle rupture
BP	GO:0001544	initiation of primordial ovarian follicle growth
BP	GO:0001545	primary ovarian follicle growth
BP	GO:0001546	preantral ovarian follicle growth
BP	GO:0001547	antral ovarian follicle growth
BP	GO:0001548	follicular fluid formation in ovarian follicle antrum
BP	GO:0001549	cumulus cell differentiation
BP	GO:0001550	ovarian cumulus expansion
BP	GO:0001551	ovarian follicle endowment
BP	GO:0001552	ovarian follicle atresia
BP	GO:0001553	luteinization
BP	GO:0001554	luteolysis
BP	GO:0001555	oocyte growth
BP	GO:0001556	oocyte maturation
BP	GO:0001557	obsolete metabolic process resulting in cell growth
BP	GO:0001558	regulation of cell growth
BP	GO:0001559	obsolete regulation of cell growth by detection of nuclear:cytoplasmic ratio
BP	GO:0001560	regulation of cell growth by extracellular stimulus
BP	GO:0001561	fatty acid alpha-oxidation
BP	GO:0001562	response to protozoan
BP	GO:0001563	detection of protozoan
BP	GO:0001564	obsolete resistance to pathogenic protozoa
MF	GO:0001565	phorbol ester receptor activity
MF	GO:0001566	non-kinase phorbol ester receptor activity
MF	GO:0001567	cholesterol 25-hydroxylase activity
BP	GO:0001568	blood vessel development
BP	GO:0001569	branching involved in blood vessel morphogenesis
BP	GO:0001570	vasculogenesis
MF	GO:0001571	non-tyrosine kinase fibroblast growth factor receptor activity
BP	GO:0001572	lactosylceramide biosynthetic process
BP	GO:0001573	ganglioside metabolic process
BP	GO:0001574	ganglioside biosynthetic process
BP	GO:0001575	globoside metabolic process
BP	GO:0001576	globoside biosynthetic process
MF	GO:0001577	obsolete galectin
BP	GO:0001578	microtubule bundle formation
BP	GO:0001579	medium-chain fatty acid transport
BP	GO:0001580	detection of chemical stimulus involved in sensory perception of bitter taste
BP	GO:0001581	detection of chemical stimulus involved in sensory perception of sour taste
BP	GO:0001582	detection of chemical stimulus involved in sensory perception of sweet taste
BP	GO:0001583	detection of chemical stimulus involved in sensory perception of salty taste
MF	GO:0001584	obsolete rhodopsin-like receptor activity
MF	GO:0001586	Gi/o-coupled serotonin receptor activity
MF	GO:0001587	Gq/11-coupled serotonin receptor activity
MF	GO:0001588	dopamine neurotransmitter receptor activity, coupled via Gs
MF	GO:0001591	dopamine neurotransmitter receptor activity, coupled via Gi/Go
MF	GO:0001594	trace-amine receptor activity
MF	GO:0001595	angiotensin receptor activity
MF	GO:0001596	angiotensin type I receptor activity
MF	GO:0001597	obsolete apelin-like receptor
MF	GO:0001598	obsolete chemokine receptor-like receptor activity
MF	GO:0001601	peptide YY receptor activity
MF	GO:0001602	pancreatic polypeptide receptor activity
MF	GO:0001603	obsolete vasopressin-like receptor activity
MF	GO:0001604	urotensin II receptor activity
MF	GO:0001605	adrenomedullin receptor activity
MF	GO:0001606	obsolete GPR37/endothelin B-like receptor activity
MF	GO:0001607	neuromedin U receptor activity
MF	GO:0001608	G protein-coupled nucleotide receptor activity
MF	GO:0001609	G protein-coupled adenosine receptor activity
MF	GO:0001614	purinergic nucleotide receptor activity
MF	GO:0001615	obsolete thyrotropin releasing hormone and secretagogue-like receptors activity
MF	GO:0001616	growth hormone secretagogue receptor activity
MF	GO:0001617	obsolete growth hormone secretagogue-like receptor activity
MF	GO:0001618	virus receptor activity
MF	GO:0001619	obsolete lysosphingolipid and lysophosphatidic acid receptor activity
MF	GO:0001621	G protein-coupled ADP receptor activity
MF	GO:0001626	nociceptin receptor activity
MF	GO:0001627	obsolete leucine-rich G-protein receptor-like receptor activity
MF	GO:0001628	obsolete gastropyloric receptor activity
MF	GO:0001629	obsolete G-protein receptor 45-like receptor activity
MF	GO:0001630	obsolete GP40-like receptor activity
MF	GO:0001631	cysteinyl leukotriene receptor activity
MF	GO:0001632	leukotriene B4 receptor activity
MF	GO:0001633	obsolete secretin-like receptor activity
MF	GO:0001634	pituitary adenylate cyclase-activating polypeptide receptor activity
MF	GO:0001635	calcitonin gene-related peptide receptor activity
MF	GO:0001636	obsolete corticotrophin-releasing factor gastric inhibitory peptide-like receptor activity
MF	GO:0001637	G protein-coupled chemoattractant receptor activity
MF	GO:0001639	PLC activating G protein-coupled glutamate receptor activity
MF	GO:0001640	adenylate cyclase inhibiting G protein-coupled glutamate receptor activity
MF	GO:0001641	group II metabotropic glutamate receptor activity
MF	GO:0001642	group III metabotropic glutamate receptor activity
MF	GO:0001646	cAMP receptor activity
MF	GO:0001647	G protein-coupled cytokinin receptor activity
MF	GO:0001648	proteinase-activated receptor activity
BP	GO:0001649	osteoblast differentiation
CC	GO:0001650	fibrillar center
CC	GO:0001651	dense fibrillar component
CC	GO:0001652	granular component
MF	GO:0001653	peptide receptor activity
BP	GO:0001654	eye development
BP	GO:0001655	urogenital system development
BP	GO:0001656	metanephros development
BP	GO:0001657	ureteric bud development
BP	GO:0001658	branching involved in ureteric bud morphogenesis
BP	GO:0001659	temperature homeostasis
BP	GO:0001660	fever generation
BP	GO:0001661	conditioned taste aversion
BP	GO:0001662	behavioral fear response
MF	GO:0001664	G protein-coupled receptor binding
MF	GO:0001665	alpha-N-acetylgalactosaminide alpha-2,6-sialyltransferase activity
BP	GO:0001666	response to hypoxia
BP	GO:0001667	ameboidal-type cell migration
CC	GO:0001669	acrosomal vesicle
MF	GO:0001671	ATPase activator activity
CC	GO:0001673	male germ cell nucleus
CC	GO:0001674	female germ cell nucleus
BP	GO:0001675	acrosome assembly
BP	GO:0001676	long-chain fatty acid metabolic process
BP	GO:0001677	formation of translation initiation ternary complex
BP	GO:0001678	intracellular glucose homeostasis
BP	GO:0001680	tRNA 3'-terminal CCA addition
MF	GO:0001681	sialate O-acetylesterase activity
BP	GO:0001682	tRNA 5'-leader removal
CC	GO:0001683	obsolete axonemal dynein heavy chain
CC	GO:0001684	obsolete axonemal dynein intermediate chain
CC	GO:0001685	obsolete axonemal dynein intermediate light chain
CC	GO:0001686	obsolete axonemal dynein light chain
CC	GO:0001687	obsolete cytoplasmic dynein heavy chain
CC	GO:0001688	obsolete cytoplasmic dynein intermediate chain
CC	GO:0001689	obsolete cytoplasmic dynein intermediate light chain
CC	GO:0001690	obsolete cytoplasmic dynein light chain
MF	GO:0001691	pseudophosphatase activity
BP	GO:0001692	histamine metabolic process
BP	GO:0001694	histamine biosynthetic process
BP	GO:0001695	histamine catabolic process
BP	GO:0001696	gastric acid secretion
BP	GO:0001697	histamine-induced gastric acid secretion
BP	GO:0001698	gastrin-induced gastric acid secretion
BP	GO:0001699	acetylcholine-induced gastric acid secretion
BP	GO:0001700	embryonic development via the syncytial blastoderm
BP	GO:0001701	in utero embryonic development
BP	GO:0001702	gastrulation with mouth forming second
BP	GO:0001703	gastrulation with mouth forming first
BP	GO:0001704	formation of primary germ layer
BP	GO:0001705	ectoderm formation
BP	GO:0001706	endoderm formation
BP	GO:0001707	mesoderm formation
BP	GO:0001708	cell fate specification
BP	GO:0001709	cell fate determination
BP	GO:0001710	mesodermal cell fate commitment
BP	GO:0001711	endodermal cell fate commitment
BP	GO:0001712	ectodermal cell fate commitment
BP	GO:0001713	ectodermal cell fate determination
BP	GO:0001714	endodermal cell fate specification
BP	GO:0001715	ectodermal cell fate specification
MF	GO:0001716	L-amino-acid oxidase activity
BP	GO:0001717	conversion of seryl-tRNAsec to selenocys-tRNAsec
BP	GO:0001720	conversion of lysyl-tRNA to pyrrolysyl-tRNA
CC	GO:0001721	obsolete intermediate filament associated protein
CC	GO:0001722	obsolete type I intermediate filament associated protein
CC	GO:0001723	obsolete type II intermediate filament associated protein
CC	GO:0001724	obsolete type III intermediate filament associated protein
CC	GO:0001725	stress fiber
CC	GO:0001726	ruffle
MF	GO:0001727	lipid kinase activity
MF	GO:0001729	ceramide kinase activity
MF	GO:0001730	2'-5'-oligoadenylate synthetase activity
BP	GO:0001731	formation of translation preinitiation complex
BP	GO:0001732	formation of cytoplasmic translation initiation complex
MF	GO:0001733	galactosylceramide sulfotransferase activity
MF	GO:0001734	mRNA (N6-adenosine)-methyltransferase activity
MF	GO:0001735	prenylcysteine oxidase activity
BP	GO:0001736	establishment of planar polarity
BP	GO:0001737	establishment of imaginal disc-derived wing hair orientation
BP	GO:0001738	morphogenesis of a polarized epithelium
CC	GO:0001739	sex chromatin
CC	GO:0001740	Barr body
CC	GO:0001741	XY body
BP	GO:0001742	oenocyte differentiation
BP	GO:0001743	lens placode formation
BP	GO:0001744	insect visual primordium formation
BP	GO:0001745	compound eye morphogenesis
BP	GO:0001746	Bolwig's organ morphogenesis
BP	GO:0001748	insect visual primordium development
CC	GO:0001750	photoreceptor outer segment
BP	GO:0001751	compound eye photoreceptor cell differentiation
BP	GO:0001752	compound eye photoreceptor fate commitment
BP	GO:0001753	obsolete adult eye photoreceptor development (sensu Drosophila)
BP	GO:0001754	eye photoreceptor cell differentiation
BP	GO:0001755	neural crest cell migration
BP	GO:0001756	somitogenesis
BP	GO:0001757	somite specification
MF	GO:0001758	retinal dehydrogenase activity
BP	GO:0001759	organ induction
MF	GO:0001760	aminocarboxymuconate-semialdehyde decarboxylase activity
MF	GO:0001761	beta-alanine transmembrane transporter activity
BP	GO:0001762	beta-alanine transport
BP	GO:0001763	morphogenesis of a branching structure
BP	GO:0001764	neuron migration
BP	GO:0001765	membrane raft assembly
BP	GO:0001766	membrane raft polarization
BP	GO:0001767	establishment of lymphocyte polarity
BP	GO:0001768	establishment of T cell polarity
BP	GO:0001769	establishment of B cell polarity
BP	GO:0001770	establishment of natural killer cell polarity
BP	GO:0001771	immunological synapse formation
CC	GO:0001772	immunological synapse
BP	GO:0001773	myeloid dendritic cell activation
BP	GO:0001774	microglial cell activation
BP	GO:0001775	cell activation
BP	GO:0001776	leukocyte homeostasis
BP	GO:0001777	T cell homeostatic proliferation
BP	GO:0001778	plasma membrane repair
BP	GO:0001779	natural killer cell differentiation
BP	GO:0001780	neutrophil homeostasis
BP	GO:0001781	neutrophil apoptotic process
BP	GO:0001782	B cell homeostasis
BP	GO:0001783	B cell apoptotic process
MF	GO:0001784	phosphotyrosine residue binding
MF	GO:0001785	prostaglandin J receptor activity
MF	GO:0001786	phosphatidylserine binding
BP	GO:0001787	natural killer cell proliferation
BP	GO:0001788	antibody-dependent cellular cytotoxicity
MF	GO:0001790	polymeric immunoglobulin binding
MF	GO:0001791	IgM binding
MF	GO:0001792	polymeric immunoglobulin receptor activity
MF	GO:0001793	IgM receptor activity
BP	GO:0001794	type IIa hypersensitivity
BP	GO:0001795	type IIb hypersensitivity
BP	GO:0001796	regulation of type IIa hypersensitivity
BP	GO:0001797	negative regulation of type IIa hypersensitivity
BP	GO:0001798	positive regulation of type IIa hypersensitivity
BP	GO:0001799	regulation of type IIb hypersensitivity
BP	GO:0001800	negative regulation of type IIb hypersensitivity
BP	GO:0001801	positive regulation of type IIb hypersensitivity
BP	GO:0001802	type III hypersensitivity
BP	GO:0001803	regulation of type III hypersensitivity
BP	GO:0001804	negative regulation of type III hypersensitivity
BP	GO:0001805	positive regulation of type III hypersensitivity
BP	GO:0001806	type IV hypersensitivity
BP	GO:0001807	regulation of type IV hypersensitivity
BP	GO:0001808	negative regulation of type IV hypersensitivity
BP	GO:0001809	positive regulation of type IV hypersensitivity
BP	GO:0001810	regulation of type I hypersensitivity
BP	GO:0001811	negative regulation of type I hypersensitivity
BP	GO:0001812	positive regulation of type I hypersensitivity
BP	GO:0001813	regulation of antibody-dependent cellular cytotoxicity
BP	GO:0001814	negative regulation of antibody-dependent cellular cytotoxicity
BP	GO:0001815	positive regulation of antibody-dependent cellular cytotoxicity
BP	GO:0001816	cytokine production
BP	GO:0001817	regulation of cytokine production
BP	GO:0001818	negative regulation of cytokine production
BP	GO:0001819	positive regulation of cytokine production
BP	GO:0001820	serotonin secretion
BP	GO:0001821	histamine secretion
BP	GO:0001822	kidney development
BP	GO:0001823	mesonephros development
BP	GO:0001824	blastocyst development
BP	GO:0001825	blastocyst formation
BP	GO:0001826	inner cell mass cell differentiation
BP	GO:0001827	inner cell mass cell fate commitment
BP	GO:0001828	inner cell mass cellular morphogenesis
BP	GO:0001829	trophectodermal cell differentiation
BP	GO:0001830	trophectodermal cell fate commitment
BP	GO:0001831	trophectodermal cellular morphogenesis
BP	GO:0001832	blastocyst growth
BP	GO:0001833	inner cell mass cell proliferation
BP	GO:0001834	trophectodermal cell proliferation
BP	GO:0001835	blastocyst hatching
BP	GO:0001836	release of cytochrome c from mitochondria
BP	GO:0001837	epithelial to mesenchymal transition
BP	GO:0001838	embryonic epithelial tube formation
BP	GO:0001839	neural plate morphogenesis
BP	GO:0001840	neural plate development
BP	GO:0001841	neural tube formation
BP	GO:0001842	neural fold formation
BP	GO:0001843	neural tube closure
BP	GO:0001844	protein insertion into mitochondrial membrane involved in apoptotic signaling pathway
BP	GO:0001845	phagolysosome assembly
MF	GO:0001846	opsonin binding
MF	GO:0001847	opsonin receptor activity
MF	GO:0001848	complement binding
MF	GO:0001849	complement component C1q complex binding
MF	GO:0001850	complement component C3a binding
MF	GO:0001851	complement component C3b binding
MF	GO:0001852	complement component iC3b binding
MF	GO:0001853	complement component C3dg binding
MF	GO:0001854	complement component C3d binding
MF	GO:0001855	complement component C4b binding
MF	GO:0001856	complement component C5a binding
MF	GO:0001857	complement component C1q receptor activity
MF	GO:0001858	complement component iC3b receptor activity
MF	GO:0001859	complement component C3dg receptor activity
MF	GO:0001860	complement component C3d receptor activity
MF	GO:0001861	complement component C4b receptor activity
MF	GO:0001862	collectin binding
MF	GO:0001863	collectin receptor activity
MF	GO:0001864	pentraxin binding
BP	GO:0001865	NK T cell differentiation
BP	GO:0001866	NK T cell proliferation
BP	GO:0001867	complement activation, lectin pathway
BP	GO:0001868	regulation of complement activation, lectin pathway
BP	GO:0001869	negative regulation of complement activation, lectin pathway
BP	GO:0001870	positive regulation of complement activation, lectin pathway
MF	GO:0001871	obsolete pattern binding
MF	GO:0001872	(1->3)-beta-D-glucan binding
MF	GO:0001873	polysaccharide immune receptor activity
MF	GO:0001874	(1->3)-beta-D-glucan immune receptor activity
MF	GO:0001875	lipopolysaccharide immune receptor activity
MF	GO:0001876	lipoarabinomannan binding
MF	GO:0001877	lipoarabinomannan immune receptor activity
BP	GO:0001878	response to yeast
BP	GO:0001879	detection of yeast
BP	GO:0001880	Mullerian duct regression
BP	GO:0001881	receptor recycling
MF	GO:0001882	nucleoside binding
MF	GO:0001883	purine nucleoside binding
MF	GO:0001884	pyrimidine nucleoside binding
BP	GO:0001885	endothelial cell development
BP	GO:0001886	endothelial cell morphogenesis
BP	GO:0001887	selenium compound metabolic process
MF	GO:0001888	glucuronyl-galactosyl-proteoglycan 4-alpha-N-acetylglucosaminyltransferase activity
BP	GO:0001889	liver development
BP	GO:0001890	placenta development
CC	GO:0001891	phagocytic cup
BP	GO:0001892	embryonic placenta development
BP	GO:0001893	maternal placenta development
BP	GO:0001894	tissue homeostasis
BP	GO:0001895	retina homeostasis
BP	GO:0001896	autolysis
BP	GO:0001897	cytolysis by symbiont of host cells
BP	GO:0001898	obsolete regulation of cytolysis by symbiont of host cells
BP	GO:0001899	obsolete negative regulation of cytolysis by symbiont of host cells
BP	GO:0001900	obsolete positive regulation of cytolysis by symbiont of host cells
BP	GO:0001905	activation of membrane attack complex
BP	GO:0001906	cell killing
BP	GO:0001907	killing by symbiont of host cells
BP	GO:0001909	leukocyte mediated cytotoxicity
BP	GO:0001910	regulation of leukocyte mediated cytotoxicity
BP	GO:0001911	negative regulation of leukocyte mediated cytotoxicity
BP	GO:0001912	positive regulation of leukocyte mediated cytotoxicity
BP	GO:0001913	T cell mediated cytotoxicity
BP	GO:0001914	regulation of T cell mediated cytotoxicity
BP	GO:0001915	negative regulation of T cell mediated cytotoxicity
BP	GO:0001916	positive regulation of T cell mediated cytotoxicity
CC	GO:0001917	photoreceptor inner segment
MF	GO:0001918	farnesylated protein binding
BP	GO:0001919	regulation of receptor recycling
BP	GO:0001920	negative regulation of receptor recycling
BP	GO:0001921	positive regulation of receptor recycling
BP	GO:0001922	B-1 B cell homeostasis
BP	GO:0001923	B-1 B cell differentiation
BP	GO:0001924	regulation of B-1 B cell differentiation
BP	GO:0001925	negative regulation of B-1 B cell differentiation
BP	GO:0001926	positive regulation of B-1 B cell differentiation
BP	GO:0001927	exocyst assembly
BP	GO:0001928	regulation of exocyst assembly
BP	GO:0001929	negative regulation of exocyst assembly
BP	GO:0001930	positive regulation of exocyst assembly
CC	GO:0001931	uropod
BP	GO:0001932	regulation of protein phosphorylation
BP	GO:0001933	negative regulation of protein phosphorylation
BP	GO:0001934	positive regulation of protein phosphorylation
BP	GO:0001935	endothelial cell proliferation
BP	GO:0001936	regulation of endothelial cell proliferation
BP	GO:0001937	negative regulation of endothelial cell proliferation
BP	GO:0001938	positive regulation of endothelial cell proliferation
CC	GO:0001939	female pronucleus
CC	GO:0001940	male pronucleus
BP	GO:0001941	postsynaptic membrane organization
BP	GO:0001942	hair follicle development
BP	GO:0001944	vasculature development
BP	GO:0001945	lymph vessel development
BP	GO:0001946	lymphangiogenesis
BP	GO:0001947	heart looping
BP	GO:0001949	sebaceous gland cell differentiation
CC	GO:0001950	obsolete plasma membrane enriched fraction
BP	GO:0001951	intestinal D-glucose absorption
BP	GO:0001952	regulation of cell-matrix adhesion
BP	GO:0001953	negative regulation of cell-matrix adhesion
BP	GO:0001954	positive regulation of cell-matrix adhesion
BP	GO:0001955	blood vessel maturation
BP	GO:0001956	positive regulation of neurotransmitter secretion
BP	GO:0001957	intramembranous ossification
BP	GO:0001958	endochondral ossification
BP	GO:0001959	regulation of cytokine-mediated signaling pathway
BP	GO:0001960	negative regulation of cytokine-mediated signaling pathway
BP	GO:0001961	positive regulation of cytokine-mediated signaling pathway
MF	GO:0001962	alpha-1,3-galactosyltransferase activity
BP	GO:0001963	synaptic transmission, dopaminergic
BP	GO:0001964	startle response
MF	GO:0001965	G-protein alpha-subunit binding
BP	GO:0001966	thigmotaxis
BP	GO:0001967	suckling behavior
MF	GO:0001968	fibronectin binding
BP	GO:0001969	regulation of activation of membrane attack complex
BP	GO:0001970	positive regulation of activation of membrane attack complex
BP	GO:0001971	negative regulation of activation of membrane attack complex
MF	GO:0001972	retinoic acid binding
BP	GO:0001973	G protein-coupled adenosine receptor signaling pathway
BP	GO:0001974	blood vessel remodeling
BP	GO:0001975	response to amphetamine
BP	GO:0001976	nervous system process involved in regulation of systemic arterial blood pressure
BP	GO:0001977	renal system process involved in regulation of blood volume
BP	GO:0001978	regulation of systemic arterial blood pressure by carotid sinus baroreceptor feedback
BP	GO:0001979	regulation of systemic arterial blood pressure by chemoreceptor signaling
BP	GO:0001980	regulation of systemic arterial blood pressure by ischemic conditions
BP	GO:0001981	baroreceptor detection of arterial stretch
BP	GO:0001982	baroreceptor response to decreased systemic arterial blood pressure
BP	GO:0001983	baroreceptor response to increased systemic arterial blood pressure
BP	GO:0001984	artery vasodilation involved in baroreceptor response to increased systemic arterial blood pressure
BP	GO:0001985	negative regulation of heart rate involved in baroreceptor response to increased systemic arterial blood pressure
BP	GO:0001986	negative regulation of the force of heart contraction involved in baroreceptor response to increased systemic arterial blood pressure
BP	GO:0001987	vasoconstriction of artery involved in baroreceptor response to lowering of systemic arterial blood pressure
BP	GO:0001988	positive regulation of heart rate involved in baroreceptor response to decreased systemic arterial blood pressure
BP	GO:0001989	positive regulation of the force of heart contraction involved in baroreceptor response to decreased systemic arterial blood pressure
BP	GO:0001990	regulation of systemic arterial blood pressure by hormone
BP	GO:0001991	regulation of systemic arterial blood pressure by circulatory renin-angiotensin
BP	GO:0001992	regulation of systemic arterial blood pressure by vasopressin
BP	GO:0001993	regulation of systemic arterial blood pressure by norepinephrine-epinephrine
BP	GO:0001994	norepinephrine-epinephrine vasoconstriction involved in regulation of systemic arterial blood pressure
BP	GO:0001995	norepinephrine-epinephrine catabolic process in blood stream
BP	GO:0001996	positive regulation of heart rate by epinephrine-norepinephrine
BP	GO:0001997	positive regulation of the force of heart contraction by epinephrine-norepinephrine
BP	GO:0001998	angiotensin-mediated vasoconstriction involved in regulation of systemic arterial blood pressure
BP	GO:0001999	renal response to blood flow involved in circulatory renin-angiotensin regulation of systemic arterial blood pressure
BP	GO:0002000	detection of renal blood flow
BP	GO:0002001	renin secretion into blood stream
BP	GO:0002002	regulation of angiotensin levels in blood
BP	GO:0002003	angiotensin maturation
BP	GO:0002004	secretion of vasopressin involved in fast regulation of systemic arterial blood pressure
BP	GO:0002006	vasoconstriction by vasopressin involved in systemic arterial blood pressure control
BP	GO:0002007	detection of hypoxic conditions in blood by chemoreceptor signaling
BP	GO:0002008	excitation of vasomotor center by chemoreceptor signaling
BP	GO:0002009	morphogenesis of an epithelium
BP	GO:0002010	excitation of vasomotor center by baroreceptor signaling
BP	GO:0002011	morphogenesis of an epithelial sheet
BP	GO:0002012	vasoconstriction of artery involved in chemoreceptor response to lowering of systemic arterial blood pressure
BP	GO:0002013	detection of carbon dioxide by vasomotor center
BP	GO:0002014	vasoconstriction of artery involved in ischemic response to lowering of systemic arterial blood pressure
BP	GO:0002015	regulation of systemic arterial blood pressure by atrial baroreceptor feedback
BP	GO:0002016	regulation of blood volume by renin-angiotensin
BP	GO:0002017	regulation of blood volume by renal aldosterone
BP	GO:0002018	renin-angiotensin regulation of aldosterone production
BP	GO:0002019	regulation of renal output by angiotensin
MF	GO:0002020	protease binding
BP	GO:0002021	response to dietary excess
BP	GO:0002022	detection of dietary excess
BP	GO:0002023	reduction of food intake in response to dietary excess
BP	GO:0002024	diet induced thermogenesis
BP	GO:0002025	norepinephrine-epinephrine-mediated vasodilation involved in regulation of systemic arterial blood pressure
BP	GO:0002026	regulation of the force of heart contraction
BP	GO:0002027	regulation of heart rate
BP	GO:0002028	regulation of sodium ion transport
BP	GO:0002029	desensitization of G protein-coupled receptor signaling pathway
BP	GO:0002030	inhibitory G protein-coupled receptor phosphorylation
BP	GO:0002031	G protein-coupled receptor internalization
BP	GO:0002032	desensitization of G protein-coupled receptor signaling pathway by arrestin
BP	GO:0002033	angiotensin-mediated vasodilation involved in regulation of systemic arterial blood pressure
BP	GO:0002034	maintenance of blood vessel diameter homeostasis by renin-angiotensin
BP	GO:0002035	brain renin-angiotensin system
BP	GO:0002036	regulation of L-glutamate import across plasma membrane
BP	GO:0002037	negative regulation of L-glutamate import across plasma membrane
BP	GO:0002038	positive regulation of L-glutamate import across plasma membrane
MF	GO:0002039	p53 binding
BP	GO:0002040	sprouting angiogenesis
BP	GO:0002041	intussusceptive angiogenesis
BP	GO:0002042	cell migration involved in sprouting angiogenesis
BP	GO:0002043	blood vessel endothelial cell proliferation involved in sprouting angiogenesis
BP	GO:0002044	blood vessel endothelial cell migration involved in intussusceptive angiogenesis
BP	GO:0002045	regulation of cell adhesion involved in intussusceptive angiogenesis
MF	GO:0002046	opsin binding
BP	GO:0002047	phenazine biosynthetic process
BP	GO:0002048	pyoverdine metabolic process
BP	GO:0002049	pyoverdine biosynthetic process
BP	GO:0002050	pyoverdine catabolic process
BP	GO:0002051	osteoblast fate commitment
BP	GO:0002052	positive regulation of neuroblast proliferation
BP	GO:0002053	positive regulation of mesenchymal cell proliferation
MF	GO:0002054	nucleobase binding
MF	GO:0002055	adenine binding
MF	GO:0002056	cytosine binding
MF	GO:0002057	guanine binding
MF	GO:0002058	uracil binding
MF	GO:0002059	thymine binding
MF	GO:0002060	purine nucleobase binding
MF	GO:0002061	pyrimidine nucleobase binding
BP	GO:0002062	chondrocyte differentiation
BP	GO:0002063	chondrocyte development
BP	GO:0002064	epithelial cell development
BP	GO:0002065	columnar/cuboidal epithelial cell differentiation
BP	GO:0002066	columnar/cuboidal epithelial cell development
BP	GO:0002067	glandular epithelial cell differentiation
BP	GO:0002068	glandular epithelial cell development
BP	GO:0002069	columnar/cuboidal epithelial cell maturation
BP	GO:0002070	epithelial cell maturation
BP	GO:0002071	glandular epithelial cell maturation
BP	GO:0002072	optic cup morphogenesis involved in camera-type eye development
BP	GO:0002074	extraocular skeletal muscle development
BP	GO:0002075	somitomeric trunk muscle development
BP	GO:0002076	osteoblast development
BP	GO:0002077	acrosome matrix dispersal
BP	GO:0002078	membrane fusion involved in acrosome reaction
CC	GO:0002079	inner acrosomal membrane
CC	GO:0002080	acrosomal membrane
CC	GO:0002081	outer acrosomal membrane
BP	GO:0002082	regulation of oxidative phosphorylation
MF	GO:0002083	4-hydroxybenzoate decaprenyltransferase activity
BP	GO:0002084	protein depalmitoylation
BP	GO:0002085	inhibition of neuroepithelial cell differentiation
BP	GO:0002086	diaphragm contraction
BP	GO:0002087	regulation of respiratory gaseous exchange by nervous system process
BP	GO:0002088	lens development in camera-type eye
BP	GO:0002089	lens morphogenesis in camera-type eye
BP	GO:0002090	regulation of receptor internalization
BP	GO:0002091	negative regulation of receptor internalization
BP	GO:0002092	positive regulation of receptor internalization
BP	GO:0002093	auditory receptor cell morphogenesis
MF	GO:0002094	polyprenyltransferase activity
CC	GO:0002095	caveolar macromolecular signaling complex
CC	GO:0002096	polkadots
BP	GO:0002097	tRNA wobble base modification
BP	GO:0002098	tRNA wobble uridine modification
BP	GO:0002099	tRNA wobble guanine modification
BP	GO:0002100	tRNA wobble adenosine to inosine editing
BP	GO:0002101	tRNA wobble cytosine modification
CC	GO:0002102	podosome
BP	GO:0002103	endonucleolytic cleavage of tetracistronic rRNA transcript (SSU-rRNA, LSU-rRNA, 4.5S-rRNA, 5S-rRNA)
BP	GO:0002104	endonucleolytic cleaveage between 4.5S rRNA and 5S rRNA of tetracistronic rRNA transcript (SSU-rRNA, LSU-rRNA, 4.5S-rRNA, 5S-rRNA)
BP	GO:0002105	endonucleolytic cleaveage between LSU-rRNA and 4.5S rRNA of tetracistronic rRNA transcript (SSU-rRNA, LSU-rRNA, 4.5S-rRNA, 5S-rRNA)
BP	GO:0002106	endonucleolytic cleaveage between SSU-rRNA and LSU-rRNA of tetracistronic rRNA transcript (SSU-rRNA, LSU-rRNA, 4.5S-rRNA, 5S-rRNA)
BP	GO:0002107	generation of mature 3'-end of 5S rRNA generated by RNA polymerase III
BP	GO:0002108	maturation of LSU-rRNA from tricistronic rRNA transcript (SSU-rRNA, LSU-rRNA,5S)
BP	GO:0002109	maturation of SSU-rRNA from tricistronic rRNA transcript (SSU-rRNA, LSU-rRNA,5S)
BP	GO:0002110	cotranscriptional mitochondrial rRNA nucleotide insertion
CC	GO:0002111	BRCA2-BRAF35 complex
MF	GO:0002112	interleukin-33 receptor binding
MF	GO:0002113	interleukin-33 binding
MF	GO:0002114	interleukin-33 receptor activity
BP	GO:0002115	store-operated calcium entry
CC	GO:0002116	semaphorin receptor complex
BP	GO:0002117	amphibian larval development
BP	GO:0002118	aggressive behavior
BP	GO:0002119	nematode larval development
BP	GO:0002120	obsolete predatory behavior
BP	GO:0002121	inter-male aggressive behavior
BP	GO:0002122	fear-induced aggressive behavior
BP	GO:0002123	irritable aggressive behavior
BP	GO:0002124	territorial aggressive behavior
BP	GO:0002125	maternal aggressive behavior
BP	GO:0002126	instrumental aggressive behavior
BP	GO:0002127	tRNA wobble base cytosine methylation
BP	GO:0002128	tRNA nucleoside ribose methylation
BP	GO:0002129	wobble position guanine ribose methylation
BP	GO:0002130	wobble position ribose methylation
BP	GO:0002131	wobble position cytosine ribose methylation
BP	GO:0002132	wobble position uridine ribose methylation
CC	GO:0002133	polycystin complex
MF	GO:0002134	UTP binding
MF	GO:0002135	CTP binding
BP	GO:0002136	tRNA wobble base lysidine biosynthesis
BP	GO:0002138	retinoic acid biosynthetic process
CC	GO:0002139	stereocilia coupling link
CC	GO:0002140	stereocilia tip link
CC	GO:0002141	stereocilia ankle link
CC	GO:0002142	stereocilia ankle link complex
BP	GO:0002143	tRNA wobble position uridine thiolation
CC	GO:0002144	cytosolic tRNA wobble base thiouridylase complex
MF	GO:0002145	4-amino-5-hydroxymethyl-2-methylpyrimidine diphosphatase activity
BP	GO:0002146	obsolete steroid hormone receptor import into nucleus
BP	GO:0002147	obsolete glucocorticoid receptor import into nucleus
BP	GO:0002148	hypochlorous acid metabolic process
BP	GO:0002149	hypochlorous acid biosynthetic process
BP	GO:0002150	hypochlorous acid catabolic process
MF	GO:0002151	G-quadruplex RNA binding
BP	GO:0002152	bile acid conjugation
MF	GO:0002153	steroid receptor RNA activator RNA binding
BP	GO:0002154	thyroid hormone mediated signaling pathway
BP	GO:0002155	regulation of thyroid hormone mediated signaling pathway
BP	GO:0002156	negative regulation of thyroid hormone mediated signaling pathway
BP	GO:0002157	positive regulation of thyroid hormone mediated signaling pathway
BP	GO:0002158	osteoclast proliferation
BP	GO:0002159	desmosome assembly
BP	GO:0002160	desmosome maintenance
MF	GO:0002161	aminoacyl-tRNA editing activity
MF	GO:0002162	dystroglycan binding
BP	GO:0002164	larval development
BP	GO:0002165	instar larval or pupal development
CC	GO:0002167	VRK3/VHR/ERK complex
BP	GO:0002168	instar larval development
CC	GO:0002169	3-methylcrotonyl-CoA carboxylase complex, mitochondrial
MF	GO:0002170	high-affinity IgA receptor activity
MF	GO:0002171	low-affinity IgA receptor activity
MF	GO:0002172	high-affinity IgM receptor activity
MF	GO:0002173	low-affinity IgM receptor activity
BP	GO:0002174	mammary stem cell proliferation
BP	GO:0002175	protein localization to paranode region of axon
BP	GO:0002176	male germ cell proliferation
CC	GO:0002177	manchette
CC	GO:0002178	palmitoyltransferase complex
CC	GO:0002179	homodimeric serine palmitoyltransferase complex
CC	GO:0002180	5-lipoxygenase complex
BP	GO:0002181	cytoplasmic translation
BP	GO:0002182	cytoplasmic translational elongation
BP	GO:0002183	cytoplasmic translational initiation
BP	GO:0002184	cytoplasmic translational termination
CC	GO:0002185	creatine kinase complex
CC	GO:0002186	cytosolic creatine kinase complex
CC	GO:0002187	mitochondrial creatine kinase complex
BP	GO:0002188	translation reinitiation
CC	GO:0002189	ribose phosphate diphosphokinase complex
BP	GO:0002190	cap-independent translational initiation
BP	GO:0002191	cap-dependent translational initiation
BP	GO:0002192	IRES-dependent translational initiation of linear mRNA
CC	GO:0002193	MAML1-RBP-Jkappa- ICN1 complex
BP	GO:0002194	hepatocyte cell migration
BP	GO:0002195	2-methylthio-N-6-(cis-hydroxy)isopentenyl adenosine-tRNA biosynthesis
MF	GO:0002196	Ser-tRNA(Ala) hydrolase activity
CC	GO:0002197	xanthine dehydrogenase complex
BP	GO:0002198	obsolete S/G2 transition of mitotic cell cycle
CC	GO:0002199	zona pellucida receptor complex
BP	GO:0002200	somatic diversification of immune receptors
BP	GO:0002201	somatic diversification of DSCAM-based immune receptors
BP	GO:0002202	somatic diversification of variable lymphocyte receptors of jawless fish
BP	GO:0002203	proteolysis by cytosolic proteases associated with antigen processing and presentation
BP	GO:0002204	somatic recombination of immunoglobulin genes involved in immune response
BP	GO:0002205	somatic hypermutation of immunoglobulin genes involved in immune response
BP	GO:0002206	gene conversion of immunoglobulin genes
BP	GO:0002207	gene conversion of immunoglobulin genes involved in immune response
BP	GO:0002208	somatic diversification of immunoglobulins involved in immune response
BP	GO:0002209	behavioral defense response
BP	GO:0002210	behavioral response to wounding
BP	GO:0002211	behavioral defense response to insect
BP	GO:0002212	behavioral defense response to nematode
BP	GO:0002213	defense response to insect
BP	GO:0002215	defense response to nematode
BP	GO:0002218	activation of innate immune response
BP	GO:0002220	innate immune response activating cell surface receptor signaling pathway
BP	GO:0002221	pattern recognition receptor signaling pathway
BP	GO:0002222	stimulatory killer cell immunoglobulin-like receptor signaling pathway
BP	GO:0002223	stimulatory C-type lectin receptor signaling pathway
BP	GO:0002224	toll-like receptor signaling pathway
BP	GO:0002225	positive regulation of antimicrobial peptide production
BP	GO:0002227	innate immune response in mucosa
BP	GO:0002228	natural killer cell mediated immunity
BP	GO:0002229	defense response to oomycetes
BP	GO:0002230	positive regulation of defense response to virus by host
BP	GO:0002231	detection of oomycetes
BP	GO:0002232	leukocyte chemotaxis involved in inflammatory response
BP	GO:0002233	leukocyte chemotaxis involved in immune response
BP	GO:0002234	detection of endoplasmic reticulum overloading
BP	GO:0002235	detection of unfolded protein
BP	GO:0002236	detection of misfolded protein
BP	GO:0002237	response to molecule of bacterial origin
BP	GO:0002238	response to molecule of fungal origin
BP	GO:0002239	response to oomycetes
BP	GO:0002240	response to molecule of oomycetes origin
BP	GO:0002241	response to parasitic plant
BP	GO:0002242	defense response to parasitic plant
BP	GO:0002243	detection of parasitic plant
BP	GO:0002244	hematopoietic progenitor cell differentiation
BP	GO:0002246	wound healing involved in inflammatory response
BP	GO:0002247	clearance of damaged tissue involved in inflammatory response wound healing
BP	GO:0002248	connective tissue replacement involved in inflammatory response wound healing
BP	GO:0002249	lymphocyte anergy
BP	GO:0002250	adaptive immune response
BP	GO:0002251	organ or tissue specific immune response
BP	GO:0002252	immune effector process
BP	GO:0002253	activation of immune response
BP	GO:0002254	kinin cascade
BP	GO:0002255	tissue kallikrein-kinin cascade
BP	GO:0002256	regulation of kinin cascade
BP	GO:0002257	negative regulation of kinin cascade
BP	GO:0002258	positive regulation of kinin cascade
BP	GO:0002259	endothelial cell activation within high endothelial venule involved in immune response
BP	GO:0002260	lymphocyte homeostasis
BP	GO:0002261	mucosal lymphocyte homeostasis
BP	GO:0002262	myeloid cell homeostasis
BP	GO:0002263	cell activation involved in immune response
BP	GO:0002264	endothelial cell activation involved in immune response
BP	GO:0002265	astrocyte activation involved in immune response
BP	GO:0002266	follicular dendritic cell activation
BP	GO:0002267	follicular dendritic cell activation involved in immune response
BP	GO:0002268	follicular dendritic cell differentiation
BP	GO:0002269	leukocyte activation involved in inflammatory response
BP	GO:0002270	plasmacytoid dendritic cell activation
BP	GO:0002271	plasmacytoid dendritic cell activation involved in immune response
BP	GO:0002272	plasmacytoid dendritic cell differentiation involved in immune response
BP	GO:0002273	plasmacytoid dendritic cell differentiation
BP	GO:0002274	myeloid leukocyte activation
BP	GO:0002275	myeloid cell activation involved in immune response
BP	GO:0002276	basophil activation involved in immune response
BP	GO:0002277	myeloid dendritic cell activation involved in immune response
BP	GO:0002278	eosinophil activation involved in immune response
BP	GO:0002279	mast cell activation involved in immune response
BP	GO:0002280	monocyte activation involved in immune response
BP	GO:0002281	macrophage activation involved in immune response
BP	GO:0002282	microglial cell activation involved in immune response
BP	GO:0002283	neutrophil activation involved in immune response
BP	GO:0002284	myeloid dendritic cell differentiation involved in immune response
BP	GO:0002285	lymphocyte activation involved in immune response
BP	GO:0002286	T cell activation involved in immune response
BP	GO:0002287	alpha-beta T cell activation involved in immune response
BP	GO:0002288	NK T cell activation involved in immune response
BP	GO:0002289	NK T cell proliferation involved in immune response
BP	GO:0002290	gamma-delta T cell activation involved in immune response
BP	GO:0002291	T cell activation via T cell receptor contact with antigen bound to MHC molecule on antigen presenting cell
BP	GO:0002292	T cell differentiation involved in immune response
BP	GO:0002293	alpha-beta T cell differentiation involved in immune response
BP	GO:0002294	CD4-positive, alpha-beta T cell differentiation involved in immune response
BP	GO:0002295	T-helper cell lineage commitment
BP	GO:0002296	T-helper 1 cell lineage commitment
BP	GO:0002297	T-helper 2 cell lineage commitment
BP	GO:0002298	CD4-positive, CD25-positive, alpha-beta regulatory T cell differentiation involved in immune response
BP	GO:0002299	alpha-beta intraepithelial T cell differentiation
BP	GO:0002300	CD8-positive, alpha-beta intraepithelial T cell differentiation
BP	GO:0002301	CD4-positive, alpha-beta intraepithelial T cell differentiation
BP	GO:0002302	CD8-positive, alpha-beta T cell differentiation involved in immune response
BP	GO:0002303	gamma-delta T cell differentiation involved in immune response
BP	GO:0002304	gamma-delta intraepithelial T cell differentiation
BP	GO:0002305	CD8-positive, gamma-delta intraepithelial T cell differentiation
BP	GO:0002306	CD4-positive gamma-delta intraepithelial T cell differentiation
BP	GO:0002307	CD8-positive, alpha-beta regulatory T cell differentiation
BP	GO:0002308	CD8-positive, alpha-beta cytotoxic T cell differentiation
BP	GO:0002309	T cell proliferation involved in immune response
BP	GO:0002310	alpha-beta T cell proliferation involved in immune response
BP	GO:0002311	gamma-delta T cell proliferation involved in immune response
BP	GO:0002312	B cell activation involved in immune response
BP	GO:0002313	mature B cell differentiation involved in immune response
BP	GO:0002314	germinal center B cell differentiation
BP	GO:0002315	marginal zone B cell differentiation
BP	GO:0002316	follicular B cell differentiation
BP	GO:0002317	plasma cell differentiation
BP	GO:0002318	myeloid progenitor cell differentiation
BP	GO:0002319	memory B cell differentiation
BP	GO:0002320	lymphoid progenitor cell differentiation
BP	GO:0002321	natural killer cell progenitor differentiation
BP	GO:0002322	B cell proliferation involved in immune response
BP	GO:0002323	natural killer cell activation involved in immune response
BP	GO:0002324	natural killer cell proliferation involved in immune response
BP	GO:0002325	natural killer cell differentiation involved in immune response
BP	GO:0002326	B cell lineage commitment
BP	GO:0002327	immature B cell differentiation
BP	GO:0002328	pro-B cell differentiation
BP	GO:0002329	pre-B cell differentiation
BP	GO:0002330	pre-B cell receptor expression
BP	GO:0002331	pre-B cell allelic exclusion
BP	GO:0002332	transitional stage B cell differentiation
BP	GO:0002333	transitional one stage B cell differentiation
BP	GO:0002334	transitional two stage B cell differentiation
BP	GO:0002335	mature B cell differentiation
BP	GO:0002336	B-1 B cell lineage commitment
BP	GO:0002337	B-1a B cell differentiation
BP	GO:0002338	B-1b B cell differentiation
BP	GO:0002339	B cell selection
BP	GO:0002340	central B cell selection
BP	GO:0002341	central B cell anergy
BP	GO:0002342	central B cell deletion
BP	GO:0002343	peripheral B cell selection
BP	GO:0002344	B cell affinity maturation
BP	GO:0002345	peripheral B cell receptor editing
BP	GO:0002346	B cell positive selection
BP	GO:0002347	response to tumor cell
BP	GO:0002348	central B cell positive selection
BP	GO:0002349	histamine production involved in inflammatory response
BP	GO:0002350	peripheral B cell positive selection
BP	GO:0002351	serotonin production involved in inflammatory response
BP	GO:0002352	B cell negative selection
BP	GO:0002353	plasma kallikrein-kinin cascade
BP	GO:0002354	central B cell negative selection
BP	GO:0002355	detection of tumor cell
BP	GO:0002356	peripheral B cell negative selection
BP	GO:0002357	defense response to tumor cell
BP	GO:0002358	B cell homeostatic proliferation
BP	GO:0002359	B-1 B cell proliferation
BP	GO:0002360	T cell lineage commitment
BP	GO:0002361	CD4-positive, CD25-positive, alpha-beta regulatory T cell differentiation
BP	GO:0002362	CD4-positive, CD25-positive, alpha-beta regulatory T cell lineage commitment
BP	GO:0002363	alpha-beta T cell lineage commitment
BP	GO:0002364	NK T cell lineage commitment
BP	GO:0002365	gamma-delta T cell lineage commitment
BP	GO:0002366	leukocyte activation involved in immune response
BP	GO:0002367	cytokine production involved in immune response
BP	GO:0002368	B cell cytokine production
BP	GO:0002369	T cell cytokine production
BP	GO:0002370	natural killer cell cytokine production
BP	GO:0002371	dendritic cell cytokine production
BP	GO:0002372	myeloid dendritic cell cytokine production
BP	GO:0002373	plasmacytoid dendritic cell cytokine production
BP	GO:0002376	immune system process
BP	GO:0002377	immunoglobulin production
BP	GO:0002381	immunoglobulin production involved in immunoglobulin-mediated immune response
BP	GO:0002382	regulation of tissue kallikrein-kinin cascade
BP	GO:0002383	immune response in brain or nervous system
BP	GO:0002384	hepatic immune response
BP	GO:0002385	mucosal immune response
BP	GO:0002387	immune response in gut-associated lymphoid tissue
BP	GO:0002388	immune response in Peyer's patch
BP	GO:0002389	tolerance induction in Peyer's patch
BP	GO:0002391	platelet activating factor production involved in inflammatory response
BP	GO:0002393	lysosomal enzyme production involved in inflammatory response
BP	GO:0002394	tolerance induction in gut-associated lymphoid tissue
BP	GO:0002395	immune response in nasopharyngeal-associated lymphoid tissue
BP	GO:0002396	MHC protein complex assembly
BP	GO:0002397	MHC class I protein complex assembly
BP	GO:0002398	MHC class Ib protein complex assembly
BP	GO:0002399	MHC class II protein complex assembly
BP	GO:0002400	tolerance induction in nasopharyngeal-associated lymphoid tissue
BP	GO:0002401	tolerance induction in mucosal-associated lymphoid tissue
BP	GO:0002402	B cell tolerance induction in mucosal-associated lymphoid tissue
BP	GO:0002403	T cell tolerance induction in mucosal-associated lymphoid tissue
BP	GO:0002404	antigen sampling in mucosal-associated lymphoid tissue
BP	GO:0002405	antigen sampling by dendritic cells in mucosal-associated lymphoid tissue
BP	GO:0002406	antigen sampling by M cells in mucosal-associated lymphoid tissue
BP	GO:0002407	dendritic cell chemotaxis
BP	GO:0002408	myeloid dendritic cell chemotaxis
BP	GO:0002409	Langerhans cell chemotaxis
BP	GO:0002410	plasmacytoid dendritic cell chemotaxis
BP	GO:0002411	T cell tolerance induction to tumor cell
BP	GO:0002412	antigen transcytosis by M cells in mucosal-associated lymphoid tissue
BP	GO:0002413	tolerance induction to tumor cell
BP	GO:0002414	immunoglobulin transcytosis in epithelial cells
BP	GO:0002415	immunoglobulin transcytosis in epithelial cells mediated by polymeric immunoglobulin receptor
BP	GO:0002416	IgG immunoglobulin transcytosis in epithelial cells mediated by FcRn immunoglobulin receptor
BP	GO:0002417	B cell antigen processing and presentation mediated by B cell receptor uptake of antigen
BP	GO:0002418	immune response to tumor cell
BP	GO:0002419	T cell mediated cytotoxicity directed against tumor cell target
BP	GO:0002420	natural killer cell mediated cytotoxicity directed against tumor cell target
BP	GO:0002421	B cell antigen processing and presentation following pinocytosis
BP	GO:0002423	natural killer cell mediated immune response to tumor cell
BP	GO:0002424	T cell mediated immune response to tumor cell
BP	GO:0002425	tolerance induction in urogenital tract
BP	GO:0002426	immunoglobulin production in mucosal tissue
BP	GO:0002427	mucosal tolerance induction
BP	GO:0002428	antigen processing and presentation of peptide antigen via MHC class Ib
BP	GO:0002429	immune response-activating cell surface receptor signaling pathway
BP	GO:0002430	complement receptor mediated signaling pathway
BP	GO:0002431	Fc receptor mediated stimulatory signaling pathway
BP	GO:0002432	granuloma formation
BP	GO:0002433	immune response-regulating cell surface receptor signaling pathway involved in phagocytosis
BP	GO:0002434	immune complex clearance
BP	GO:0002435	immune complex clearance by erythrocytes
BP	GO:0002436	immune complex clearance by monocytes and macrophages
BP	GO:0002437	inflammatory response to antigenic stimulus
BP	GO:0002438	acute inflammatory response to antigenic stimulus
BP	GO:0002439	chronic inflammatory response to antigenic stimulus
BP	GO:0002440	production of molecular mediator of immune response
BP	GO:0002441	histamine secretion involved in inflammatory response
BP	GO:0002442	serotonin secretion involved in inflammatory response
BP	GO:0002443	leukocyte mediated immunity
BP	GO:0002444	myeloid leukocyte mediated immunity
BP	GO:0002445	type II hypersensitivity
BP	GO:0002446	neutrophil mediated immunity
BP	GO:0002447	eosinophil mediated immunity
BP	GO:0002448	mast cell mediated immunity
BP	GO:0002449	lymphocyte mediated immunity
BP	GO:0002450	B cell antigen processing and presentation
BP	GO:0002451	peripheral B cell tolerance induction
BP	GO:0002452	B cell receptor editing
BP	GO:0002453	peripheral B cell anergy
BP	GO:0002454	peripheral B cell deletion
BP	GO:0002455	humoral immune response mediated by circulating immunoglobulin
BP	GO:0002456	T cell mediated immunity
BP	GO:0002457	T cell antigen processing and presentation
BP	GO:0002458	peripheral T cell tolerance induction
BP	GO:0002459	adaptive immune response based on somatic recombination of immune receptors built from leucine-rich repeat domains
BP	GO:0002460	adaptive immune response based on somatic recombination of immune receptors built from immunoglobulin superfamily domains
BP	GO:0002461	tolerance induction dependent upon immune response
BP	GO:0002462	tolerance induction to nonself antigen
BP	GO:0002463	central tolerance induction to nonself antigen
BP	GO:0002464	peripheral tolerance induction to nonself antigen
BP	GO:0002465	peripheral tolerance induction
BP	GO:0002466	peripheral tolerance induction to self antigen
BP	GO:0002467	germinal center formation
BP	GO:0002468	dendritic cell antigen processing and presentation
BP	GO:0002469	myeloid dendritic cell antigen processing and presentation
BP	GO:0002470	plasmacytoid dendritic cell antigen processing and presentation
BP	GO:0002471	monocyte antigen processing and presentation
BP	GO:0002472	macrophage antigen processing and presentation
BP	GO:0002473	non-professional antigen presenting cell antigen processing and presentation
BP	GO:0002474	antigen processing and presentation of peptide antigen via MHC class I
BP	GO:0002475	antigen processing and presentation via MHC class Ib
BP	GO:0002476	antigen processing and presentation of endogenous peptide antigen via MHC class Ib
BP	GO:0002477	antigen processing and presentation of exogenous peptide antigen via MHC class Ib
BP	GO:0002478	antigen processing and presentation of exogenous peptide antigen
BP	GO:0002479	antigen processing and presentation of exogenous peptide antigen via MHC class I, TAP-dependent
BP	GO:0002480	antigen processing and presentation of exogenous peptide antigen via MHC class I, TAP-independent
BP	GO:0002481	antigen processing and presentation of exogenous protein antigen via MHC class Ib, TAP-dependent
BP	GO:0002482	antigen processing and presentation of exogenous protein antigen via MHC class Ib, TAP-independent
BP	GO:0002483	antigen processing and presentation of endogenous peptide antigen
BP	GO:0002484	antigen processing and presentation of endogenous peptide antigen via MHC class I via ER pathway
BP	GO:0002485	antigen processing and presentation of endogenous peptide antigen via MHC class I via ER pathway, TAP-dependent
BP	GO:0002486	antigen processing and presentation of endogenous peptide antigen via MHC class I via ER pathway, TAP-independent
BP	GO:0002487	antigen processing and presentation of endogenous peptide antigen via MHC class I via endolysosomal pathway
BP	GO:0002488	antigen processing and presentation of endogenous peptide antigen via MHC class Ib via ER pathway
BP	GO:0002489	antigen processing and presentation of endogenous peptide antigen via MHC class Ib via ER pathway, TAP-dependent
BP	GO:0002490	antigen processing and presentation of endogenous peptide antigen via MHC class Ib via ER pathway, TAP-independent
BP	GO:0002491	antigen processing and presentation of endogenous peptide antigen via MHC class II
BP	GO:0002492	peptide antigen assembly with MHC class Ib protein complex
BP	GO:0002493	lipid antigen assembly with MHC class Ib protein complex
BP	GO:0002494	lipid antigen transport
BP	GO:0002495	antigen processing and presentation of peptide antigen via MHC class II
BP	GO:0002496	proteolysis associated with antigen processing and presentation
BP	GO:0002497	proteasomal proteolysis associated with antigen processing and presentation
BP	GO:0002498	proteolysis within endoplasmic reticulum associated with antigen processing and presentation
BP	GO:0002499	proteolysis within endosome associated with antigen processing and presentation
BP	GO:0002500	proteolysis within lysosome associated with antigen processing and presentation
BP	GO:0002501	peptide antigen assembly with MHC protein complex
BP	GO:0002502	peptide antigen assembly with MHC class I protein complex
BP	GO:0002503	peptide antigen assembly with MHC class II protein complex
BP	GO:0002504	antigen processing and presentation of peptide or polysaccharide antigen via MHC class II
BP	GO:0002505	antigen processing and presentation of polysaccharide antigen via MHC class II
BP	GO:0002507	tolerance induction
BP	GO:0002508	central tolerance induction
BP	GO:0002509	central tolerance induction to self antigen
BP	GO:0002510	central B cell tolerance induction
BP	GO:0002511	central B cell receptor editing
BP	GO:0002512	central T cell tolerance induction
BP	GO:0002513	tolerance induction to self antigen
BP	GO:0002514	B cell tolerance induction
BP	GO:0002515	B cell anergy
BP	GO:0002516	B cell deletion
BP	GO:0002517	T cell tolerance induction
BP	GO:0002518	lymphocyte chemotaxis across high endothelial venule
BP	GO:0002519	natural killer cell tolerance induction
BP	GO:0002520	immune system development
BP	GO:0002521	leukocyte differentiation
BP	GO:0002522	leukocyte migration involved in immune response
BP	GO:0002523	leukocyte migration involved in inflammatory response
BP	GO:0002524	hypersensitivity
BP	GO:0002525	acute inflammatory response to non-antigenic stimulus
BP	GO:0002526	acute inflammatory response
BP	GO:0002527	vasodilation involved in acute inflammatory response
BP	GO:0002528	regulation of vascular permeability involved in acute inflammatory response
BP	GO:0002529	regulation of plasma kallikrein-kinin cascade
BP	GO:0002530	regulation of systemic arterial blood pressure involved in acute-phase response
BP	GO:0002531	regulation of heart contraction involved in acute-phase response
BP	GO:0002532	production of molecular mediator involved in inflammatory response
BP	GO:0002533	lysosomal enzyme secretion involved in inflammatory response
BP	GO:0002534	cytokine production involved in inflammatory response
BP	GO:0002536	respiratory burst involved in inflammatory response
BP	GO:0002537	nitric oxide production involved in inflammatory response
BP	GO:0002538	arachidonic acid metabolite production involved in inflammatory response
BP	GO:0002539	prostaglandin production involved in inflammatory response
BP	GO:0002540	leukotriene production involved in inflammatory response
BP	GO:0002541	activation of plasma proteins involved in acute inflammatory response
BP	GO:0002542	Factor XII activation
BP	GO:0002543	activation of blood coagulation via clotting cascade
BP	GO:0002544	chronic inflammatory response
BP	GO:0002545	chronic inflammatory response to non-antigenic stimulus
BP	GO:0002546	negative regulation of tissue kallikrein-kinin cascade
BP	GO:0002547	positive regulation of tissue kallikrein-kinin cascade
BP	GO:0002548	monocyte chemotaxis
BP	GO:0002549	negative regulation of plasma kallikrein-kinin cascade
BP	GO:0002550	positive regulation of plasma kallikrein-kinin cascade
BP	GO:0002551	mast cell chemotaxis
BP	GO:0002552	serotonin secretion by mast cell
BP	GO:0002553	histamine secretion by mast cell
BP	GO:0002554	serotonin secretion by platelet
BP	GO:0002555	histamine secretion by platelet
BP	GO:0002556	serotonin secretion by basophil
BP	GO:0002557	histamine secretion by basophil
BP	GO:0002558	type I hypersensitivity mediated by mast cells
BP	GO:0002559	type I hypersensitivity mediated by basophils
BP	GO:0002560	basophil mediated immunity
BP	GO:0002561	basophil degranulation
BP	GO:0002562	somatic diversification of immune receptors via germline recombination within a single locus
BP	GO:0002563	somatic diversification of immune receptors via alternate splicing
BP	GO:0002564	alternate splicing of immunoglobulin genes
BP	GO:0002565	somatic diversification of immune receptors via gene conversion
BP	GO:0002566	somatic diversification of immune receptors via somatic mutation
BP	GO:0002567	somatic diversification of FREP-based immune receptors
BP	GO:0002568	somatic diversification of T cell receptor genes
BP	GO:0002569	somatic diversification of immune receptors by N region addition
BP	GO:0002570	somatic diversification of immunoglobulin genes by N region addition
BP	GO:0002571	somatic diversification of T cell receptor genes by N region addition
BP	GO:0002572	pro-T cell differentiation
BP	GO:0002573	myeloid leukocyte differentiation
BP	GO:0002574	thrombocyte differentiation
BP	GO:0002575	basophil chemotaxis
BP	GO:0002576	platelet degranulation
BP	GO:0002577	regulation of antigen processing and presentation
BP	GO:0002578	negative regulation of antigen processing and presentation
BP	GO:0002579	positive regulation of antigen processing and presentation
BP	GO:0002580	regulation of antigen processing and presentation of peptide or polysaccharide antigen via MHC class II
BP	GO:0002581	negative regulation of antigen processing and presentation of peptide or polysaccharide antigen via MHC class II
BP	GO:0002582	positive regulation of antigen processing and presentation of peptide or polysaccharide antigen via MHC class II
BP	GO:0002583	regulation of antigen processing and presentation of peptide antigen
BP	GO:0002584	negative regulation of antigen processing and presentation of peptide antigen
BP	GO:0002585	positive regulation of antigen processing and presentation of peptide antigen
BP	GO:0002586	regulation of antigen processing and presentation of peptide antigen via MHC class II
BP	GO:0002587	negative regulation of antigen processing and presentation of peptide antigen via MHC class II
BP	GO:0002588	positive regulation of antigen processing and presentation of peptide antigen via MHC class II
BP	GO:0002589	regulation of antigen processing and presentation of peptide antigen via MHC class I
BP	GO:0002590	negative regulation of antigen processing and presentation of peptide antigen via MHC class I
BP	GO:0002591	positive regulation of antigen processing and presentation of peptide antigen via MHC class I
BP	GO:0002592	regulation of antigen processing and presentation via MHC class Ib
BP	GO:0002593	negative regulation of antigen processing and presentation via MHC class Ib
BP	GO:0002594	positive regulation of antigen processing and presentation via MHC class Ib
BP	GO:0002595	regulation of antigen processing and presentation of peptide antigen via MHC class Ib
BP	GO:0002596	negative regulation of antigen processing and presentation of peptide antigen via MHC class Ib
BP	GO:0002597	positive regulation of antigen processing and presentation of peptide antigen via MHC class Ib
BP	GO:0002598	regulation of antigen processing and presentation of lipid antigen via MHC class Ib
BP	GO:0002599	negative regulation of antigen processing and presentation of lipid antigen via MHC class Ib
BP	GO:0002600	positive regulation of antigen processing and presentation of lipid antigen via MHC class Ib
BP	GO:0002601	regulation of antigen processing and presentation of polysaccharide antigen via MHC class II
BP	GO:0002602	negative regulation of antigen processing and presentation of polysaccharide antigen via MHC class II
BP	GO:0002603	positive regulation of antigen processing and presentation of polysaccharide antigen via MHC class II
BP	GO:0002604	regulation of dendritic cell antigen processing and presentation
BP	GO:0002605	negative regulation of dendritic cell antigen processing and presentation
BP	GO:0002606	positive regulation of dendritic cell antigen processing and presentation
BP	GO:0002607	regulation of myeloid dendritic cell antigen processing and presentation
BP	GO:0002608	negative regulation of myeloid dendritic cell antigen processing and presentation
BP	GO:0002609	positive regulation of myeloid dendritic cell antigen processing and presentation
BP	GO:0002610	regulation of plasmacytoid dendritic cell antigen processing and presentation
BP	GO:0002611	negative regulation of plasmacytoid dendritic cell antigen processing and presentation
BP	GO:0002612	positive regulation of plasmacytoid dendritic cell antigen processing and presentation
BP	GO:0002613	regulation of monocyte antigen processing and presentation
BP	GO:0002614	negative regulation of monocyte antigen processing and presentation
BP	GO:0002615	positive regulation of monocyte antigen processing and presentation
BP	GO:0002616	regulation of macrophage antigen processing and presentation
BP	GO:0002617	negative regulation of macrophage antigen processing and presentation
BP	GO:0002618	positive regulation of macrophage antigen processing and presentation
BP	GO:0002619	regulation of non-professional antigen presenting cell antigen processing and presentation
BP	GO:0002620	negative regulation of non-professional antigen presenting cell antigen processing and presentation
BP	GO:0002621	positive regulation of non-professional antigen presenting cell antigen processing and presentation
BP	GO:0002622	regulation of B cell antigen processing and presentation
BP	GO:0002623	negative regulation of B cell antigen processing and presentation
BP	GO:0002624	positive regulation of B cell antigen processing and presentation
BP	GO:0002625	regulation of T cell antigen processing and presentation
BP	GO:0002626	negative regulation of T cell antigen processing and presentation
BP	GO:0002627	positive regulation of T cell antigen processing and presentation
BP	GO:0002628	regulation of proteolysis associated with antigen processing and presentation
BP	GO:0002629	negative regulation of proteolysis associated with antigen processing and presentation
BP	GO:0002630	positive regulation of proteolysis associated with antigen processing and presentation
BP	GO:0002631	regulation of granuloma formation
BP	GO:0002632	negative regulation of granuloma formation
BP	GO:0002633	positive regulation of granuloma formation
BP	GO:0002634	regulation of germinal center formation
BP	GO:0002635	negative regulation of germinal center formation
BP	GO:0002636	positive regulation of germinal center formation
BP	GO:0002637	regulation of immunoglobulin production
BP	GO:0002638	negative regulation of immunoglobulin production
BP	GO:0002639	positive regulation of immunoglobulin production
BP	GO:0002643	regulation of tolerance induction
BP	GO:0002644	negative regulation of tolerance induction
BP	GO:0002645	positive regulation of tolerance induction
BP	GO:0002646	regulation of central tolerance induction
BP	GO:0002647	negative regulation of central tolerance induction
BP	GO:0002648	positive regulation of central tolerance induction
BP	GO:0002649	regulation of tolerance induction to self antigen
BP	GO:0002650	negative regulation of tolerance induction to self antigen
BP	GO:0002651	positive regulation of tolerance induction to self antigen
BP	GO:0002652	regulation of tolerance induction dependent upon immune response
BP	GO:0002653	negative regulation of tolerance induction dependent upon immune response
BP	GO:0002654	positive regulation of tolerance induction dependent upon immune response
BP	GO:0002655	regulation of tolerance induction to nonself antigen
BP	GO:0002656	negative regulation of tolerance induction to nonself antigen
BP	GO:0002657	positive regulation of tolerance induction to nonself antigen
BP	GO:0002658	regulation of peripheral tolerance induction
BP	GO:0002659	negative regulation of peripheral tolerance induction
BP	GO:0002660	positive regulation of peripheral tolerance induction
BP	GO:0002661	regulation of B cell tolerance induction
BP	GO:0002662	negative regulation of B cell tolerance induction
BP	GO:0002663	positive regulation of B cell tolerance induction
BP	GO:0002664	regulation of T cell tolerance induction
BP	GO:0002665	negative regulation of T cell tolerance induction
BP	GO:0002666	positive regulation of T cell tolerance induction
BP	GO:0002667	regulation of T cell anergy
BP	GO:0002668	negative regulation of T cell anergy
BP	GO:0002669	positive regulation of T cell anergy
BP	GO:0002670	regulation of B cell anergy
BP	GO:0002671	negative regulation of B cell anergy
BP	GO:0002672	positive regulation of B cell anergy
BP	GO:0002673	regulation of acute inflammatory response
BP	GO:0002674	negative regulation of acute inflammatory response
BP	GO:0002675	positive regulation of acute inflammatory response
BP	GO:0002676	regulation of chronic inflammatory response
BP	GO:0002677	negative regulation of chronic inflammatory response
BP	GO:0002678	positive regulation of chronic inflammatory response
BP	GO:0002679	respiratory burst involved in defense response
BP	GO:0002680	pro-T cell lineage commitment
BP	GO:0002681	somatic recombination of T cell receptor gene segments
BP	GO:0002682	regulation of immune system process
BP	GO:0002683	negative regulation of immune system process
BP	GO:0002684	positive regulation of immune system process
BP	GO:0002685	regulation of leukocyte migration
BP	GO:0002686	negative regulation of leukocyte migration
BP	GO:0002687	positive regulation of leukocyte migration
BP	GO:0002688	regulation of leukocyte chemotaxis
BP	GO:0002689	negative regulation of leukocyte chemotaxis
BP	GO:0002690	positive regulation of leukocyte chemotaxis
BP	GO:0002691	regulation of cellular extravasation
BP	GO:0002692	negative regulation of cellular extravasation
BP	GO:0002693	positive regulation of cellular extravasation
BP	GO:0002694	regulation of leukocyte activation
BP	GO:0002695	negative regulation of leukocyte activation
BP	GO:0002696	positive regulation of leukocyte activation
BP	GO:0002697	regulation of immune effector process
BP	GO:0002698	negative regulation of immune effector process
BP	GO:0002699	positive regulation of immune effector process
BP	GO:0002700	regulation of production of molecular mediator of immune response
BP	GO:0002701	negative regulation of production of molecular mediator of immune response
BP	GO:0002702	positive regulation of production of molecular mediator of immune response
BP	GO:0002703	regulation of leukocyte mediated immunity
BP	GO:0002704	negative regulation of leukocyte mediated immunity
BP	GO:0002705	positive regulation of leukocyte mediated immunity
BP	GO:0002706	regulation of lymphocyte mediated immunity
BP	GO:0002707	negative regulation of lymphocyte mediated immunity
BP	GO:0002708	positive regulation of lymphocyte mediated immunity
BP	GO:0002709	regulation of T cell mediated immunity
BP	GO:0002710	negative regulation of T cell mediated immunity
BP	GO:0002711	positive regulation of T cell mediated immunity
BP	GO:0002712	regulation of B cell mediated immunity
BP	GO:0002713	negative regulation of B cell mediated immunity
BP	GO:0002714	positive regulation of B cell mediated immunity
BP	GO:0002715	regulation of natural killer cell mediated immunity
BP	GO:0002716	negative regulation of natural killer cell mediated immunity
BP	GO:0002717	positive regulation of natural killer cell mediated immunity
BP	GO:0002718	regulation of cytokine production involved in immune response
BP	GO:0002719	negative regulation of cytokine production involved in immune response
BP	GO:0002720	positive regulation of cytokine production involved in immune response
BP	GO:0002721	regulation of B cell cytokine production
BP	GO:0002722	negative regulation of B cell cytokine production
BP	GO:0002723	positive regulation of B cell cytokine production
BP	GO:0002724	regulation of T cell cytokine production
BP	GO:0002725	negative regulation of T cell cytokine production
BP	GO:0002726	positive regulation of T cell cytokine production
BP	GO:0002727	regulation of natural killer cell cytokine production
BP	GO:0002728	negative regulation of natural killer cell cytokine production
BP	GO:0002729	positive regulation of natural killer cell cytokine production
BP	GO:0002730	regulation of dendritic cell cytokine production
BP	GO:0002731	negative regulation of dendritic cell cytokine production
BP	GO:0002732	positive regulation of dendritic cell cytokine production
BP	GO:0002733	regulation of myeloid dendritic cell cytokine production
BP	GO:0002734	negative regulation of myeloid dendritic cell cytokine production
BP	GO:0002735	positive regulation of myeloid dendritic cell cytokine production
BP	GO:0002736	regulation of plasmacytoid dendritic cell cytokine production
BP	GO:0002737	negative regulation of plasmacytoid dendritic cell cytokine production
BP	GO:0002738	positive regulation of plasmacytoid dendritic cell cytokine production
BP	GO:0002745	antigen processing and presentation initiated by receptor mediated uptake of antigen
BP	GO:0002746	antigen processing and presentation following pinocytosis
BP	GO:0002747	antigen processing and presentation following phagocytosis
BP	GO:0002748	antigen processing and presentation initiated by pattern recognition receptor mediated uptake of antigen
BP	GO:0002749	obsolete antigen processing and presentation initiated by toll-like receptor mediated phagocytosis of antigen
BP	GO:0002750	antigen processing and presentation following macropinocytosis
BP	GO:0002751	antigen processing and presentation following receptor mediated endocytosis
BP	GO:0002752	cell surface pattern recognition receptor signaling pathway
BP	GO:0002753	cytoplasmic pattern recognition receptor signaling pathway
[truncated: 45,638 more rows]
