# Supplementary material for: Comparative Genomics Unveils Functional Diversity, Pangenome Openness, and Underlying Biological Drivers among Bacillus subtilis Group
Source: Microorganisms. 2024 May 14;12(5):986. doi: 10.3390/microorganisms12050986 (PMC11124052; doi:10.3390/microorganisms12050986)
Supplement: Supplementary file 1 [file microorganisms-12-00986-s001.zip › microorganisms-2985640-supplementary/Supplementary_table.xlsx]

## Sheet: Supplementary Table S1
Supplementary Table S1. Sample IDs and Species Information for 2091 Bs Group Genome Samples
The "failed" column represents genome data filtered based on quality control. Genomes that do not meet the CheckM criteria are labeled as "CheckM_FAIL," and those that do not meet the GTDB criteria are labeled as "GTDB_FAIL."
All others are marked as PASS. A total of 19 genomes were filtered out, leaving 2072 genomes.
sample	species	failed
GCF_000195515.1_ASM19551v1_genomic	Bacillus amyloliquefaciens	PASS
GCF_000196735.1_ASM19673v1_genomic	Bacillus amyloliquefaciens	PASS
GCF_000204275.1_ASM20427v1_genomic	Bacillus amyloliquefaciens	PASS
GCF_000221645.1_ASM22164v1_genomic	Bacillus amyloliquefaciens	PASS
GCF_000242855.2_ASM24285v2_genomic	Bacillus amyloliquefaciens	PASS
GCF_000330805.1_ASM33080v1_genomic	Bacillus amyloliquefaciens	PASS
GCF_000465655.1_GS_De_Novo_Assembly_genomic	Bacillus amyloliquefaciens	PASS
GCF_000469015.2_BA1_genomic	Bacillus amyloliquefaciens	PASS
GCF_000494835.1_ASM49483v1_genomic	Bacillus amyloliquefaciens	PASS
GCF_000508265.1_ASM50826v1_genomic	Bacillus amyloliquefaciens	PASS
GCF_000559145.1_BacAmy_A3_genomic	Bacillus amyloliquefaciens	PASS
GCF_000747705.1_ASM74770v1_genomic	Bacillus amyloliquefaciens	PASS
GCF_000750045.1_ASM75004v1_genomic	Bacillus amyloliquefaciens	PASS
GCF_000784675.1_A3_1_genomic	Bacillus amyloliquefaciens	PASS
GCF_000817575.1_ASM81757v1_genomic	Bacillus amyloliquefaciens	PASS
GCF_000835145.1_ASM83514v1_genomic	Bacillus amyloliquefaciens	PASS
GCF_001077735.1_Lx-11-1.0_genomic	Bacillus amyloliquefaciens	PASS
GCF_001278635.1_ASM127863v1_genomic	Bacillus amyloliquefaciens	PASS
GCF_001286945.1_Bacillus_JRS5_genomic	Bacillus amyloliquefaciens	PASS
GCF_001286965.1_Bacillus_JRS8_genomic	Bacillus amyloliquefaciens	PASS
GCF_001294785.1_ASM129478v1_genomic	Bacillus amyloliquefaciens	PASS
GCF_001431285.1_ASM143128v1_genomic	Bacillus amyloliquefaciens	PASS
GCF_001469685.1_ASM146968v1_genomic	Bacillus amyloliquefaciens	PASS
GCF_001483885.1_ASM148388v1_genomic	Bacillus amyloliquefaciens	PASS
GCF_001558705.1_ASM155870v1_genomic	Bacillus amyloliquefaciens	PASS
GCF_001586105.1_ASM158610v1_genomic	Bacillus amyloliquefaciens	PASS
GCF_001587325.1_B4140_genomic	Bacillus amyloliquefaciens	PASS
GCF_001587435.1_B425_genomic	Bacillus amyloliquefaciens	PASS
GCF_001593765.1_ASM159376v1_genomic	Bacillus amyloliquefaciens	PASS
GCF_001593785.1_ASM159378v1_genomic	Bacillus amyloliquefaciens	PASS
GCF_001596755.1_ASM159675v1_genomic	Bacillus amyloliquefaciens	PASS
GCF_001617995.1_ASM161799v1_genomic	Bacillus amyloliquefaciens	PASS
GCF_001619745.1_ASM161974v1_genomic	Bacillus amyloliquefaciens	PASS
GCF_001672615.1_ASM167261v1_genomic	Bacillus amyloliquefaciens	PASS
GCF_001687185.1_ASM168718v1_genomic	Bacillus amyloliquefaciens	PASS
GCF_001705195.1_ASM170519v1_genomic	Bacillus amyloliquefaciens	PASS
GCF_001866745.1_ASM186674v1_genomic	Bacillus amyloliquefaciens	PASS
GCF_001874385.1_ASM187438v1_genomic	Bacillus amyloliquefaciens	PASS
GCF_001889285.1_ASM188928v1_genomic	Bacillus amyloliquefaciens	PASS
GCF_001922005.1_ASM192200v1_genomic	Bacillus amyloliquefaciens	PASS
GCF_002024555.1_ASM202455v1_genomic	Bacillus amyloliquefaciens	PASS
GCF_002173635.1_ASM217363v1_genomic	Bacillus amyloliquefaciens	PASS
GCF_002209305.1_ASM220930v1_genomic	Bacillus amyloliquefaciens	PASS
GCF_002864145.1_ASM286414v1_genomic	Bacillus amyloliquefaciens	PASS
GCF_003149695.1_ASM314969v1_genomic	Bacillus amyloliquefaciens	PASS
GCF_003149715.1_ASM314971v1_genomic	Bacillus amyloliquefaciens	PASS
GCF_003149795.1_ASM314979v1_genomic	Bacillus amyloliquefaciens	PASS
GCF_003312895.1_ASM331289v1_genomic	Bacillus amyloliquefaciens	PASS
GCF_003337795.1_ASM333779v1_genomic	Bacillus amyloliquefaciens	PASS
GCF_003382375.1_ASM338237v1_genomic	Bacillus amyloliquefaciens	PASS
GCF_003546075.1_ASM354607v1_genomic	Bacillus amyloliquefaciens	PASS
GCF_003868675.1_ASM386867v1_genomic	Bacillus amyloliquefaciens	PASS
GCF_004006115.1_ASM400611v1_genomic	Bacillus amyloliquefaciens	PASS
GCF_004421045.1_ASM442104v1_genomic	Bacillus amyloliquefaciens	PASS
GCF_004804235.1_ASM480423v1_genomic	Bacillus amyloliquefaciens	PASS
GCF_004804245.1_ASM480424v1_genomic	Bacillus amyloliquefaciens	PASS
GCF_005048195.1_ASM504819v1_genomic	Bacillus amyloliquefaciens	PASS
GCF_007362635.1_ASM736263v1_genomic	Bacillus amyloliquefaciens	PASS
GCF_007827165.1_ASM782716v1_genomic	Bacillus amyloliquefaciens	PASS
GCF_007844995.1_ASM784499v1_genomic	Bacillus amyloliquefaciens	PASS
GCF_007845085.1_ASM784508v1_genomic	Bacillus amyloliquefaciens	PASS
GCF_007923205.1_ASM792320v1_genomic	Bacillus amyloliquefaciens	PASS
GCF_008017555.1_ASM801755v1_genomic	Bacillus amyloliquefaciens	PASS
GCF_008017565.1_ASM801756v1_genomic	Bacillus amyloliquefaciens	PASS
GCF_008017625.1_ASM801762v1_genomic	Bacillus amyloliquefaciens	PASS
GCF_008534375.1_ASM853437v1_genomic	Bacillus amyloliquefaciens	PASS
GCF_008808015.1_ASM880801v1_genomic	Bacillus amyloliquefaciens	PASS
GCF_008824205.1_ASM882420v1_genomic	Bacillus amyloliquefaciens	PASS
GCF_009933355.1_ASM993335v1_genomic	Bacillus amyloliquefaciens	PASS
GCF_011440355.1_ASM1144035v1_genomic	Bacillus amyloliquefaciens	PASS
GCF_011754125.1_ASM1175412v1_genomic	Bacillus amyloliquefaciens	PASS
GCF_013122255.1_ASM1312225v1_genomic	Bacillus amyloliquefaciens	PASS
GCF_013328835.1_ASM1332883v1_genomic	Bacillus amyloliquefaciens	PASS
GCF_013341255.1_ASM1334125v1_genomic	Bacillus amyloliquefaciens	PASS
GCF_013346105.1_ASM1334610v1_genomic	Bacillus amyloliquefaciens	PASS
GCF_013346165.1_ASM1334616v1_genomic	Bacillus amyloliquefaciens	PASS
GCF_013346175.1_ASM1334617v1_genomic	Bacillus amyloliquefaciens	PASS
GCF_013346205.1_ASM1334620v1_genomic	Bacillus amyloliquefaciens	PASS
GCF_013346215.1_ASM1334621v1_genomic	Bacillus amyloliquefaciens	PASS
GCF_013346225.1_ASM1334622v1_genomic	Bacillus amyloliquefaciens	PASS
GCF_013346265.1_ASM1334626v1_genomic	Bacillus amyloliquefaciens	PASS
GCF_013346285.1_ASM1334628v1_genomic	Bacillus amyloliquefaciens	PASS
GCF_013346305.1_ASM1334630v1_genomic	Bacillus amyloliquefaciens	PASS
GCF_013423695.1_ASM1342369v1_genomic	Bacillus amyloliquefaciens	PASS
GCF_014622745.1_ASM1462274v1_genomic	Bacillus amyloliquefaciens	PASS
GCF_014791945.1_ASM1479194v1_genomic	Bacillus amyloliquefaciens	PASS
GCF_014792065.1_ASM1479206v1_genomic	Bacillus amyloliquefaciens	PASS
GCF_014840205.2_ASM1484020v2_genomic	Bacillus amyloliquefaciens	PASS
GCF_014854735.1_ASM1485473v1_genomic	Bacillus amyloliquefaciens	PASS
GCF_014930895.1_ASM1493089v1_genomic	Bacillus amyloliquefaciens	PASS
GCF_015845485.1_ASM1584548v1_genomic	Bacillus amyloliquefaciens	PASS
GCF_015880875.1_ASM1588087v1_genomic	Bacillus amyloliquefaciens	PASS
GCF_015999565.1_ASM1599956v1_genomic	Bacillus amyloliquefaciens	PASS
GCF_017357905.1_ASM1735790v1_genomic	Bacillus amyloliquefaciens	PASS
GCF_017592865.1_ASM1759286v1_genomic	Bacillus amyloliquefaciens	PASS
GCF_017603845.1_ASM1760384v1_genomic	Bacillus amyloliquefaciens	PASS
GCF_017815555.1_ASM1781555v1_genomic	Bacillus amyloliquefaciens	PASS
GCF_017824715.1_ASM1782471v1_genomic	Bacillus amyloliquefaciens	PASS
GCF_017948535.1_ASM1794853v1_genomic	Bacillus amyloliquefaciens	PASS
GCF_018223605.1_ASM1822360v1_genomic	Bacillus amyloliquefaciens	PASS
GCF_018363035.1_ASM1836303v1_genomic	Bacillus amyloliquefaciens	PASS
GCF_018502525.1_ASM1850252v1_genomic	Bacillus amyloliquefaciens	PASS
GCF_018791865.1_ASM1879186v1_genomic	Bacillus amyloliquefaciens	PASS
GCF_019093835.1_ASM1909383v1_genomic	Bacillus amyloliquefaciens	PASS
GCF_019396925.1_ASM1939692v1_genomic	Bacillus amyloliquefaciens	PASS
GCF_019458745.1_ASM1945874v1_genomic	Bacillus amyloliquefaciens	PASS
GCF_019458775.1_ASM1945877v1_genomic	Bacillus amyloliquefaciens	PASS
GCF_019459645.1_ASM1945964v1_genomic	Bacillus amyloliquefaciens	PASS
GCF_019856555.1_ASM1985655v1_genomic	Bacillus amyloliquefaciens	PASS
GCF_019880285.1_ASM1988028v1_genomic	Bacillus amyloliquefaciens	PASS
GCF_019880325.1_ASM1988032v1_genomic	Bacillus amyloliquefaciens	PASS
GCF_019880425.1_ASM1988042v1_genomic	Bacillus amyloliquefaciens	PASS
GCF_019997305.1_ASM1999730v1_genomic	Bacillus amyloliquefaciens	PASS
GCF_020176805.1_ASM2017680v1_genomic	Bacillus amyloliquefaciens	PASS
GCF_020179775.1_ASM2017977v1_genomic	Bacillus amyloliquefaciens	PASS
GCF_020256445.1_ASM2025644v1_genomic	Bacillus amyloliquefaciens	PASS
GCF_020311635.1_ASM2031163v1_genomic	Bacillus amyloliquefaciens	PASS
GCF_020536055.1_ASM2053605v1_genomic	Bacillus amyloliquefaciens	PASS
GCF_020971785.1_ASM2097178v1_genomic	Bacillus amyloliquefaciens	PASS
GCF_021128895.1_ASM2112889v1_genomic	Bacillus amyloliquefaciens	PASS
GCF_021233135.1_ASM2123313v1_genomic	Bacillus amyloliquefaciens	PASS
GCF_022492915.1_ASM2249291v1_genomic	Bacillus amyloliquefaciens	PASS
GCF_022559645.1_ASM2255964v1_genomic	Bacillus amyloliquefaciens	PASS
GCF_022832415.1_ASM2283241v1_genomic	Bacillus amyloliquefaciens	PASS
GCF_022833015.1_ASM2283301v1_genomic	Bacillus amyloliquefaciens	PASS
GCF_023115375.1_ASM2311537v1_genomic	Bacillus amyloliquefaciens	PASS
GCF_023238285.1_ASM2323828v1_genomic	Bacillus amyloliquefaciens	PASS
GCF_023278425.1_ASM2327842v1_genomic	Bacillus amyloliquefaciens	PASS
GCF_023714985.1_ASM2371498v1_genomic	Bacillus amyloliquefaciens	PASS
GCF_023757615.1_ASM2375761v1_genomic	Bacillus amyloliquefaciens	PASS
GCF_023920185.1_ASM2392018v1_genomic	Bacillus amyloliquefaciens	PASS
GCF_024138555.1_ASM2413855v1_genomic	Bacillus amyloliquefaciens	PASS
GCF_024168855.1_ASM2416885v1_genomic	Bacillus amyloliquefaciens	PASS
GCF_024452365.1_ASM2445236v1_genomic	Bacillus amyloliquefaciens	PASS
GCF_024539565.1_ASM2453956v1_genomic	Bacillus amyloliquefaciens	PASS
GCF_024539575.1_ASM2453957v1_genomic	Bacillus amyloliquefaciens	PASS
GCF_024653145.1_ASM2465314v1_genomic	Bacillus amyloliquefaciens	PASS
GCF_024653455.1_ASM2465345v1_genomic	Bacillus amyloliquefaciens	PASS
GCF_024653505.1_ASM2465350v1_genomic	Bacillus amyloliquefaciens	PASS
GCF_024653525.1_ASM2465352v1_genomic	Bacillus amyloliquefaciens	PASS
GCF_024653545.1_ASM2465354v1_genomic	Bacillus amyloliquefaciens	PASS
GCF_024706495.1_ASM2470649v1_genomic	Bacillus amyloliquefaciens	PASS
GCF_026123105.1_ASM2612310v1_genomic	Bacillus amyloliquefaciens	PASS
GCF_026156345.1_ASM2615634v1_genomic	Bacillus amyloliquefaciens	PASS
GCF_026319435.1_ASM2631943v1_genomic	Bacillus amyloliquefaciens	PASS
GCF_026684155.1_ASM2668415v1_genomic	Bacillus amyloliquefaciens	PASS
GCF_026786425.1_ASM2678642v1_genomic	Bacillus amyloliquefaciens	PASS
GCF_027213705.1_ASM2721370v1_genomic	Bacillus amyloliquefaciens	PASS
GCF_027942375.1_ASM2794237v1_genomic	Bacillus amyloliquefaciens	PASS
GCF_028895325.1_ASM2889532v1_genomic	Bacillus amyloliquefaciens	PASS
GCF_028993875.1_ASM2899387v1_genomic	Bacillus amyloliquefaciens	PASS
GCF_029278325.1_ASM2927832v1_genomic	Bacillus amyloliquefaciens	PASS
GCF_029350825.1_ASM2935082v1_genomic	Bacillus amyloliquefaciens	PASS
GCF_029350965.1_ASM2935096v1_genomic	Bacillus amyloliquefaciens	PASS
GCF_029371985.1_ASM2937198v1_genomic	Bacillus amyloliquefaciens	PASS
GCF_029857055.1_ASM2985705v1_genomic	Bacillus amyloliquefaciens	PASS
GCF_029857155.1_ASM2985715v1_genomic	Bacillus amyloliquefaciens	PASS
GCF_029866505.1_ASM2986650v1_genomic	Bacillus amyloliquefaciens	PASS
GCF_030063805.1_ASM3006380v1_genomic	Bacillus amyloliquefaciens	PASS
GCF_030131825.1_ASM3013182v1_genomic	Bacillus amyloliquefaciens	PASS
GCF_030220145.1_ASM3022014v1_genomic	Bacillus amyloliquefaciens	PASS
GCF_030252125.1_ASM3025212v1_genomic	Bacillus amyloliquefaciens	PASS
GCF_030268785.1_ASM3026878v1_genomic	Bacillus amyloliquefaciens	PASS
GCF_030269725.1_ASM3026972v1_genomic	Bacillus amyloliquefaciens	PASS
GCF_030284565.1_ASM3028456v1_genomic	Bacillus amyloliquefaciens	PASS
GCF_030369895.1_ASM3036989v1_genomic	Bacillus amyloliquefaciens	PASS
GCF_030369915.1_ASM3036991v1_genomic	Bacillus amyloliquefaciens	PASS
GCF_030517795.1_ASM3051779v1_genomic	Bacillus amyloliquefaciens	PASS
GCF_030520205.1_ASM3052020v1_genomic	Bacillus amyloliquefaciens	PASS
GCF_031119145.1_ASM3111914v1_genomic	Bacillus amyloliquefaciens	PASS
GCF_031317035.1_ASM3131703v1_genomic	Bacillus amyloliquefaciens	PASS
GCF_032918205.1_ASM3291820v1_genomic	Bacillus amyloliquefaciens	PASS
GCF_032930055.1_ASM3293005v1_genomic	Bacillus amyloliquefaciens	PASS
GCF_032933215.1_ASM3293321v1_genomic	Bacillus amyloliquefaciens	PASS
GCF_900156245.1_IMG-taxon_2681812862_annotated_assembly_genomic	Bacillus amyloliquefaciens	PASS
GCF_900245865.1_Ba.Jxnu-18.1_genomic	Bacillus amyloliquefaciens	PASS
GCF_000332645.1_BSI1.0_genomic	Bacillus inaquosorum	PASS
GCF_001534785.1_ASM153478v1_genomic	Bacillus inaquosorum	PASS
GCF_003148415.1_ASM314841v1_genomic	Bacillus inaquosorum	PASS
GCF_003413465.1_ASM341346v1_genomic	Bacillus inaquosorum	PASS
GCF_018603775.1_ASM1860377v1_genomic	Bacillus inaquosorum	PASS
GCF_018619255.1_ASM1861925v1_genomic	Bacillus inaquosorum	PASS
GCF_018619295.1_ASM1861929v1_genomic	Bacillus inaquosorum	PASS
GCF_019598985.1_ASM1959898v1_genomic	Bacillus inaquosorum	PASS
GCF_023238325.1_ASM2323832v1_genomic	Bacillus inaquosorum	PASS
GCF_026278285.1_ASM2627828v1_genomic	Bacillus inaquosorum	PASS
GCF_026788225.1_ASM2678822v1_genomic	Bacillus inaquosorum	PASS
GCF_026788265.1_ASM2678826v1_genomic	Bacillus inaquosorum	PASS
GCF_026788285.1_ASM2678828v1_genomic	Bacillus inaquosorum	PASS
GCF_026788375.1_ASM2678837v1_genomic	Bacillus inaquosorum	PASS
GCF_026788565.1_ASM2678856v1_genomic	Bacillus inaquosorum	PASS
GCF_026788945.1_ASM2678894v1_genomic	Bacillus inaquosorum	PASS
GCF_026788965.1_ASM2678896v1_genomic	Bacillus inaquosorum	PASS
GCF_026788985.1_ASM2678898v1_genomic	Bacillus inaquosorum	PASS
GCF_026789065.1_ASM2678906v1_genomic	Bacillus inaquosorum	PASS
GCF_026789145.1_ASM2678914v1_genomic	Bacillus inaquosorum	PASS
GCF_026789165.1_ASM2678916v1_genomic	Bacillus inaquosorum	PASS
GCF_026789225.1_ASM2678922v1_genomic	Bacillus inaquosorum	PASS
GCF_026789245.1_ASM2678924v1_genomic	Bacillus inaquosorum	PASS
GCF_026789305.1_ASM2678930v1_genomic	Bacillus inaquosorum	PASS
GCF_026789325.1_ASM2678932v1_genomic	Bacillus inaquosorum	PASS
GCF_026789335.1_ASM2678933v1_genomic	Bacillus inaquosorum	PASS
GCF_026789485.1_ASM2678948v1_genomic	Bacillus inaquosorum	PASS
GCF_026789565.1_ASM2678956v1_genomic	Bacillus inaquosorum	PASS
GCF_026789805.1_ASM2678980v1_genomic	Bacillus inaquosorum	PASS
GCF_026789845.1_ASM2678984v1_genomic	Bacillus inaquosorum	PASS
GCF_026789945.1_ASM2678994v1_genomic	Bacillus inaquosorum	PASS
GCF_026789965.1_ASM2678996v1_genomic	Bacillus inaquosorum	PASS
GCF_026790005.1_ASM2679000v1_genomic	Bacillus inaquosorum	PASS
GCF_026790175.1_ASM2679017v1_genomic	Bacillus inaquosorum	PASS
GCF_026790225.1_ASM2679022v1_genomic	Bacillus inaquosorum	PASS
GCF_026790265.1_ASM2679026v1_genomic	Bacillus inaquosorum	PASS
GCF_026790305.1_ASM2679030v1_genomic	Bacillus inaquosorum	PASS
GCF_026790375.1_ASM2679037v1_genomic	Bacillus inaquosorum	PASS
GCF_026790555.1_ASM2679055v1_genomic	Bacillus inaquosorum	PASS
GCF_026790615.1_ASM2679061v1_genomic	Bacillus inaquosorum	PASS
GCF_026790635.1_ASM2679063v1_genomic	Bacillus inaquosorum	PASS
GCF_026790695.1_ASM2679069v1_genomic	Bacillus inaquosorum	PASS
GCF_026790735.1_ASM2679073v1_genomic	Bacillus inaquosorum	PASS
GCF_026790785.1_ASM2679078v1_genomic	Bacillus inaquosorum	PASS
GCF_026790975.1_ASM2679097v1_genomic	Bacillus inaquosorum	PASS
GCF_026790995.1_ASM2679099v1_genomic	Bacillus inaquosorum	PASS
GCF_026791155.1_ASM2679115v1_genomic	Bacillus inaquosorum	PASS
GCF_026791165.1_ASM2679116v1_genomic	Bacillus inaquosorum	PASS
GCF_026791285.1_ASM2679128v1_genomic	Bacillus inaquosorum	PASS
GCF_026791485.1_ASM2679148v1_genomic	Bacillus inaquosorum	PASS
GCF_026791835.1_ASM2679183v1_genomic	Bacillus inaquosorum	PASS
GCF_026791905.1_ASM2679190v1_genomic	Bacillus inaquosorum	PASS
GCF_026792815.1_ASM2679281v1_genomic	Bacillus inaquosorum	PASS
GCF_026792835.1_ASM2679283v1_genomic	Bacillus inaquosorum	PASS
GCF_026792895.1_ASM2679289v1_genomic	Bacillus inaquosorum	PASS
GCF_026792915.1_ASM2679291v1_genomic	Bacillus inaquosorum	PASS
GCF_026792975.1_ASM2679297v1_genomic	Bacillus inaquosorum	PASS
GCF_026793055.1_ASM2679305v1_genomic	Bacillus inaquosorum	PASS
GCF_026793105.1_ASM2679310v1_genomic	Bacillus inaquosorum	PASS
GCF_026793125.1_ASM2679312v1_genomic	Bacillus inaquosorum	PASS
GCF_026793205.1_ASM2679320v1_genomic	Bacillus inaquosorum	PASS
GCF_026793275.1_ASM2679327v1_genomic	Bacillus inaquosorum	PASS
GCF_026793285.1_ASM2679328v1_genomic	Bacillus inaquosorum	PASS
GCF_026793495.1_ASM2679349v1_genomic	Bacillus inaquosorum	PASS
GCF_026793525.1_ASM2679352v1_genomic	Bacillus inaquosorum	PASS
GCF_026793575.1_ASM2679357v1_genomic	Bacillus inaquosorum	PASS
GCF_026793595.1_ASM2679359v1_genomic	Bacillus inaquosorum	PASS
GCF_026793655.1_ASM2679365v1_genomic	Bacillus inaquosorum	PASS
GCF_026793695.1_ASM2679369v1_genomic	Bacillus inaquosorum	PASS
GCF_026794635.1_ASM2679463v1_genomic	Bacillus inaquosorum	PASS
GCF_026794675.1_ASM2679467v1_genomic	Bacillus inaquosorum	PASS
GCF_026794685.1_ASM2679468v1_genomic	Bacillus inaquosorum	PASS
GCF_026794725.1_ASM2679472v1_genomic	Bacillus inaquosorum	PASS
GCF_026794735.1_ASM2679473v1_genomic	Bacillus inaquosorum	PASS
GCF_026794775.1_ASM2679477v1_genomic	Bacillus inaquosorum	PASS
GCF_026794785.1_ASM2679478v1_genomic	Bacillus inaquosorum	PASS
GCF_026794795.1_ASM2679479v1_genomic	Bacillus inaquosorum	PASS
GCF_026794805.1_ASM2679480v1_genomic	Bacillus inaquosorum	PASS
GCF_026794825.1_ASM2679482v1_genomic	Bacillus inaquosorum	PASS
GCF_026794875.1_ASM2679487v1_genomic	Bacillus inaquosorum	PASS
GCF_026794895.1_ASM2679489v1_genomic	Bacillus inaquosorum	PASS
GCF_026794905.1_ASM2679490v1_genomic	Bacillus inaquosorum	PASS
GCF_026794925.1_ASM2679492v1_genomic	Bacillus inaquosorum	PASS
GCF_026794975.1_ASM2679497v1_genomic	Bacillus inaquosorum	PASS
GCF_026794995.1_ASM2679499v1_genomic	Bacillus inaquosorum	PASS
GCF_026795015.1_ASM2679501v1_genomic	Bacillus inaquosorum	PASS
GCF_026795035.1_ASM2679503v1_genomic	Bacillus inaquosorum	PASS
GCF_026795075.1_ASM2679507v1_genomic	Bacillus inaquosorum	PASS
GCF_026795115.1_ASM2679511v1_genomic	Bacillus inaquosorum	PASS
GCF_026795335.1_ASM2679533v1_genomic	Bacillus inaquosorum	PASS
GCF_026795435.1_ASM2679543v1_genomic	Bacillus inaquosorum	PASS
GCF_026795755.1_ASM2679575v1_genomic	Bacillus inaquosorum	PASS
GCF_026795775.1_ASM2679577v1_genomic	Bacillus inaquosorum	PASS
GCF_026796055.1_ASM2679605v1_genomic	Bacillus inaquosorum	PASS
GCF_026796205.1_ASM2679620v1_genomic	Bacillus inaquosorum	PASS
GCF_026796275.1_ASM2679627v1_genomic	Bacillus inaquosorum	PASS
GCF_026796435.1_ASM2679643v1_genomic	Bacillus inaquosorum	PASS
GCF_026796445.1_ASM2679644v1_genomic	Bacillus inaquosorum	PASS
GCF_026796475.1_ASM2679647v1_genomic	Bacillus inaquosorum	PASS
GCF_026796555.1_ASM2679655v1_genomic	Bacillus inaquosorum	PASS
GCF_026796565.1_ASM2679656v1_genomic	Bacillus inaquosorum	PASS
GCF_026796775.1_ASM2679677v1_genomic	Bacillus inaquosorum	PASS
GCF_029948165.1_ASM2994816v1_genomic	Bacillus inaquosorum	PASS
GCF_030128945.2_ASM3012894v2_genomic	Bacillus inaquosorum	PASS
GCF_030177695.1_ASM3017769v1_genomic	Bacillus inaquosorum	PASS
GCF_032463625.1_ASM3246362v1_genomic	Bacillus inaquosorum	PASS
GCF_000408885.1_ASM40888v1_genomic	Bacillus paralicheniformis	PASS
GCF_000604165.1_Bacillus_licheniformis_strain_G-1_genomic	Bacillus paralicheniformis	PASS
GCF_000746885.1_BLA_genomic	Bacillus paralicheniformis	PASS
GCF_000876525.1_ASM87652v1_genomic	Bacillus paralicheniformis	PASS
GCF_001042485.2_ASM104248v2_genomic	Bacillus paralicheniformis	PASS
GCF_001188525.1_ASM118852v1_genomic	Bacillus paralicheniformis	PASS
GCF_001691735.1_ASM169173v1_genomic	Bacillus paralicheniformis	PASS
GCF_001925035.1_ASM192503v1_genomic	Bacillus paralicheniformis	PASS
GCF_001925045.1_ASM192504v1_genomic	Bacillus paralicheniformis	PASS
GCF_001925105.1_ASM192510v1_genomic	Bacillus paralicheniformis	PASS
GCF_001939545.1_ASM193954v1_genomic	Bacillus paralicheniformis	PASS
GCF_002026335.1_ASM202633v1_genomic	Bacillus paralicheniformis	PASS
GCF_002068155.1_ASM206815v1_genomic	Bacillus paralicheniformis	PASS
GCF_002271505.1_assembly-7704_v1_genomic	Bacillus paralicheniformis	PASS
GCF_002272155.1_assembly-7510_v1_genomic	Bacillus paralicheniformis	PASS
GCF_002393225.1_ASM239322v1_genomic	Bacillus paralicheniformis	PASS
GCF_002849425.1_ASM284942v1_genomic	Bacillus paralicheniformis	PASS
GCF_002993925.1_ASM299392v1_genomic	Bacillus paralicheniformis	PASS
GCF_002993945.1_ASM299394v1_genomic	Bacillus paralicheniformis	PASS
GCF_002998255.1_ASM299825v1_genomic	Bacillus paralicheniformis	PASS
GCF_003171815.2_ASM317181v2_genomic	Bacillus paralicheniformis	PASS
GCF_003711025.1_ASM371102v1_genomic	Bacillus paralicheniformis	PASS
GCF_004282815.1_ASM428281v1_genomic	Bacillus paralicheniformis	PASS
GCF_004296375.1_ASM429637v1_genomic	Bacillus paralicheniformis	PASS
GCF_005047705.1_ASM504770v1_genomic	Bacillus paralicheniformis	PASS
GCF_007113895.2_ASM711389v2_genomic	Bacillus paralicheniformis	PASS
GCF_007830755.1_ASM783075v1_genomic	Bacillus paralicheniformis	PASS
GCF_007830855.1_ASM783085v1_genomic	Bacillus paralicheniformis	PASS
GCF_007830895.1_ASM783089v1_genomic	Bacillus paralicheniformis	PASS
GCF_007830915.1_ASM783091v1_genomic	Bacillus paralicheniformis	PASS
GCF_007830945.1_ASM783094v1_genomic	Bacillus paralicheniformis	PASS
GCF_007831095.1_ASM783109v1_genomic	Bacillus paralicheniformis	PASS
GCF_007831125.1_ASM783112v1_genomic	Bacillus paralicheniformis	PASS
GCF_007831175.1_ASM783117v1_genomic	Bacillus paralicheniformis	PASS
GCF_007831185.1_ASM783118v1_genomic	Bacillus paralicheniformis	PASS
GCF_007831335.1_ASM783133v1_genomic	Bacillus paralicheniformis	PASS
GCF_007831375.1_ASM783137v1_genomic	Bacillus paralicheniformis	PASS
GCF_007831395.1_ASM783139v1_genomic	Bacillus paralicheniformis	PASS
GCF_007831535.1_ASM783153v1_genomic	Bacillus paralicheniformis	PASS
GCF_007831555.1_ASM783155v1_genomic	Bacillus paralicheniformis	PASS
GCF_007831595.1_ASM783159v1_genomic	Bacillus paralicheniformis	PASS
GCF_007831845.1_ASM783184v1_genomic	Bacillus paralicheniformis	PASS
GCF_007831895.1_ASM783189v1_genomic	Bacillus paralicheniformis	PASS
GCF_007831905.1_ASM783190v1_genomic	Bacillus paralicheniformis	PASS
GCF_007831955.1_ASM783195v1_genomic	Bacillus paralicheniformis	PASS
GCF_007832015.1_ASM783201v1_genomic	Bacillus paralicheniformis	PASS
GCF_007832075.1_ASM783207v1_genomic	Bacillus paralicheniformis	PASS
GCF_007832115.1_ASM783211v1_genomic	Bacillus paralicheniformis	PASS
GCF_007832305.1_ASM783230v1_genomic	Bacillus paralicheniformis	PASS
GCF_007832405.1_ASM783240v1_genomic	Bacillus paralicheniformis	PASS
GCF_007832455.1_ASM783245v1_genomic	Bacillus paralicheniformis	PASS
GCF_007832535.1_ASM783253v1_genomic	Bacillus paralicheniformis	PASS
GCF_007994205.1_ASM799420v1_genomic	Bacillus paralicheniformis	PASS
GCF_007994265.1_ASM799426v1_genomic	Bacillus paralicheniformis	PASS
GCF_007994395.1_ASM799439v1_genomic	Bacillus paralicheniformis	PASS
GCF_007994475.1_ASM799447v1_genomic	Bacillus paralicheniformis	PASS
GCF_008365255.1_ASM836525v1_genomic	Bacillus paralicheniformis	PASS
GCF_008368485.1_ASM836848v1_genomic	Bacillus paralicheniformis	PASS
GCF_008368495.1_ASM836849v1_genomic	Bacillus paralicheniformis	PASS
GCF_009295625.1_ASM929562v1_genomic	Bacillus paralicheniformis	PASS
GCF_009497935.1_ASM949793v1_genomic	Bacillus paralicheniformis	PASS
GCF_009690825.1_ASM969082v1_genomic	Bacillus paralicheniformis	PASS
GCF_009690855.1_ASM969085v1_genomic	Bacillus paralicheniformis	PASS
GCF_009690865.1_ASM969086v1_genomic	Bacillus paralicheniformis	PASS
GCF_009690925.1_ASM969092v1_genomic	Bacillus paralicheniformis	PASS
GCF_009935535.1_ASM993553v1_genomic	Bacillus paralicheniformis	PASS
GCF_009935615.1_ASM993561v1_genomic	Bacillus paralicheniformis	PASS
GCF_011068305.1_ASM1106830v1_genomic	Bacillus paralicheniformis	PASS
GCF_012027855.1_ASM1202785v1_genomic	Bacillus paralicheniformis	PASS
GCF_015547165.1_ASM1554716v1_genomic	Bacillus paralicheniformis	PASS
GCF_015550535.1_ASM1555053v1_genomic	Bacillus paralicheniformis	PASS
GCF_015557955.1_ASM1555795v1_genomic	Bacillus paralicheniformis	PASS
GCF_015845295.1_ASM1584529v1_genomic	Bacillus paralicheniformis	PASS
GCF_015953145.1_ASM1595314v1_genomic	Bacillus paralicheniformis	PASS
GCF_016786285.1_Bac_Para_940_3.1.1_genomic	Bacillus paralicheniformis	PASS
GCF_018195595.1_ASM1819559v1_genomic	Bacillus paralicheniformis	PASS
GCF_018324505.1_ASM1832450v1_genomic	Bacillus paralicheniformis	PASS
GCF_018324565.1_ASM1832456v1_genomic	Bacillus paralicheniformis	PASS
GCF_018332895.1_ASM1833289v1_genomic	Bacillus paralicheniformis	PASS
GCF_018332915.1_ASM1833291v1_genomic	Bacillus paralicheniformis	PASS
GCF_018332935.1_ASM1833293v1_genomic	Bacillus paralicheniformis	PASS
GCF_018595795.3_ASM1859579v3_genomic	Bacillus paralicheniformis	PASS
GCF_018917315.1_ASM1891731v1_genomic	Bacillus paralicheniformis	PASS
GCF_019036955.1_ASM1903695v1_genomic	Bacillus paralicheniformis	PASS
GCF_019037005.1_ASM1903700v1_genomic	Bacillus paralicheniformis	PASS
GCF_019037035.1_ASM1903703v1_genomic	Bacillus paralicheniformis	PASS
GCF_019037485.1_ASM1903748v1_genomic	Bacillus paralicheniformis	PASS
GCF_019336205.1_ASM1933620v1_genomic	Bacillus paralicheniformis	PASS
GCF_019738955.1_ASM1973895v1_genomic	Bacillus paralicheniformis	PASS
GCF_020042645.1_ASM2004264v1_genomic	Bacillus paralicheniformis	PASS
GCF_020072115.1_ASM2007211v1_genomic	Bacillus paralicheniformis	PASS
GCF_020564665.1_ASM2056466v1_genomic	Bacillus paralicheniformis	PASS
GCF_021654715.1_ASM2165471v1_genomic	Bacillus paralicheniformis	PASS
GCF_021654735.1_ASM2165473v1_genomic	Bacillus paralicheniformis	PASS
GCF_021654755.1_ASM2165475v1_genomic	Bacillus paralicheniformis	PASS
GCF_022952805.1_ASM2295280v1_genomic	Bacillus paralicheniformis	PASS
GCF_022953115.1_ASM2295311v1_genomic	Bacillus paralicheniformis	PASS
GCF_023502625.1_ASM2350262v1_genomic	Bacillus paralicheniformis	PASS
GCF_023713125.1_ASM2371312v1_genomic	Bacillus paralicheniformis	PASS
GCF_023930055.1_ASM2393005v1_genomic	Bacillus paralicheniformis	PASS
GCF_024464535.1_ASM2446453v1_genomic	Bacillus paralicheniformis	PASS
GCF_024623095.1_ASM2462309v1_genomic	Bacillus paralicheniformis	PASS
GCF_024649555.1_ASM2464955v1_genomic	Bacillus paralicheniformis	PASS
GCF_025161175.1_ASM2516117v1_genomic	Bacillus paralicheniformis	PASS
GCF_025515495.1_ASM2551549v1_genomic	Bacillus paralicheniformis	PASS
GCF_025833795.1_ASM2583379v1_genomic	Bacillus paralicheniformis	PASS
GCF_026066475.1_ASM2606647v1_genomic	Bacillus paralicheniformis	PASS
GCF_026210435.1_ASM2621043v1_genomic	Bacillus paralicheniformis	PASS
GCF_026672655.1_ASM2667265v1_genomic	Bacillus paralicheniformis	PASS
GCF_026723705.1_ASM2672370v1_genomic	Bacillus paralicheniformis	PASS
GCF_026786645.1_ASM2678664v1_genomic	Bacillus paralicheniformis	PASS
GCF_026789645.1_ASM2678964v1_genomic	Bacillus paralicheniformis	PASS
GCF_026790475.1_ASM2679047v1_genomic	Bacillus paralicheniformis	PASS
GCF_026790515.1_ASM2679051v1_genomic	Bacillus paralicheniformis	PASS
GCF_026796705.1_ASM2679670v1_genomic	Bacillus paralicheniformis	PASS
GCF_028746155.1_ASM2874615v1_genomic	Bacillus paralicheniformis	PASS
GCF_028857355.1_ASM2885735v1_genomic	Bacillus paralicheniformis	PASS
GCF_028857535.1_ASM2885753v1_genomic	Bacillus paralicheniformis	PASS
GCF_028857545.1_ASM2885754v1_genomic	Bacillus paralicheniformis	PASS
GCF_028857555.1_ASM2885755v1_genomic	Bacillus paralicheniformis	PASS
GCF_029000405.1_ASM2900040v1_genomic	Bacillus paralicheniformis	PASS
GCF_029536955.1_ASM2953695v1_genomic	Bacillus paralicheniformis	PASS
GCF_029537035.1_ASM2953703v1_genomic	Bacillus paralicheniformis	PASS
GCF_029590455.1_ASM2959045v1_genomic	Bacillus paralicheniformis	PASS
GCF_029931445.1_ASM2993144v1_genomic	Bacillus paralicheniformis	PASS
GCF_030123025.1_ASM3012302v1_genomic	Bacillus paralicheniformis	PASS
GCF_030166695.1_ASM3016669v1_genomic	Bacillus paralicheniformis	PASS
GCF_031316755.1_ASM3131675v1_genomic	Bacillus paralicheniformis	PASS
GCF_031326025.1_ASM3132602v1_genomic	Bacillus paralicheniformis	PASS
GCF_032467935.1_ASM3246793v1_genomic	Bacillus paralicheniformis	PASS
GCF_033542675.1_ASM3354267v1_genomic	Bacillus paralicheniformis	PASS
GCF_900635765.1_33763_B01_genomic	Bacillus paralicheniformis	PASS
GCF_902363785.1_MGYG-HGUT-00147_genomic	Bacillus paralicheniformis	PASS
GCF_948330225.1_WGS_ASS_CCMM_B951_genomic	Bacillus paralicheniformis	PASS
GCF_948330315.1_WGS_ASS_CCMM_B774_genomic	Bacillus paralicheniformis	PASS
GCF_948330325.1_WGS_ASS_CCMM_B969_genomic	Bacillus paralicheniformis	PASS
GCF_022748675.1_ASM2274867v1_genomic	Bacillus spizizenii	CheckM_FAIL
GCF_026790405.1_ASM2679040v1_genomic	Bacillus spizizenii	CheckM_FAIL
GCF_000146565.1_ASM14656v1_genomic	Bacillus spizizenii	PASS
GCF_000177595.1_ASM17759v1_genomic	Bacillus spizizenii	PASS
GCF_000227465.1_ASM22746v1_genomic	Bacillus spizizenii	PASS
GCF_000245035.1_ASM24503v2_genomic	Bacillus spizizenii	PASS
GCF_000743215.1_BST_genomic	Bacillus spizizenii	PASS
GCF_000931815.1_G1A3_genomic	Bacillus spizizenii	PASS
GCF_000931825.1_G1A4_genomic	Bacillus spizizenii	PASS
GCF_000931835.1_G4C10_genomic	Bacillus spizizenii	PASS
GCF_000931845.1_G5B15_genomic	Bacillus spizizenii	PASS
GCF_000959025.1_ASM95902v1_genomic	Bacillus spizizenii	PASS
GCF_001566945.1_ASM156694v1_genomic	Bacillus spizizenii	PASS
GCF_002027305.1_ASM202730v1_genomic	Bacillus spizizenii	PASS
GCF_002155045.1_ASM215504v1_genomic	Bacillus spizizenii	PASS
GCF_002211235.1_ASM221123v1_genomic	Bacillus spizizenii	PASS
GCF_005771655.1_ASM577165v1_genomic	Bacillus spizizenii	PASS
GCF_006094475.1_ASM609447v1_genomic	Bacillus spizizenii	PASS
GCF_007989785.1_ASM798978v1_genomic	Bacillus spizizenii	PASS
GCF_014499015.1_ASM1449901v1_genomic	Bacillus spizizenii	PASS
GCF_014856535.1_ASM1485653v1_genomic	Bacillus spizizenii	PASS
GCF_018619315.1_ASM1861931v1_genomic	Bacillus spizizenii	PASS
GCF_023713105.1_ASM2371310v1_genomic	Bacillus spizizenii	PASS
GCF_024653135.1_ASM2465313v1_genomic	Bacillus spizizenii	PASS
GCF_026788245.1_ASM2678824v1_genomic	Bacillus spizizenii	PASS
GCF_026788465.1_ASM2678846v1_genomic	Bacillus spizizenii	PASS
GCF_026788485.1_ASM2678848v1_genomic	Bacillus spizizenii	PASS
GCF_026788505.1_ASM2678850v1_genomic	Bacillus spizizenii	PASS
GCF_026788515.1_ASM2678851v1_genomic	Bacillus spizizenii	PASS
GCF_026788585.1_ASM2678858v1_genomic	Bacillus spizizenii	PASS
GCF_026788605.1_ASM2678860v1_genomic	Bacillus spizizenii	PASS
GCF_026788615.1_ASM2678861v1_genomic	Bacillus spizizenii	PASS
GCF_026788645.1_ASM2678864v1_genomic	Bacillus spizizenii	PASS
GCF_026788705.1_ASM2678870v1_genomic	Bacillus spizizenii	PASS
GCF_026788775.1_ASM2678877v1_genomic	Bacillus spizizenii	PASS
GCF_026788805.1_ASM2678880v1_genomic	Bacillus spizizenii	PASS
GCF_026788815.1_ASM2678881v1_genomic	Bacillus spizizenii	PASS
GCF_026788845.1_ASM2678884v1_genomic	Bacillus spizizenii	PASS
GCF_026788865.1_ASM2678886v1_genomic	Bacillus spizizenii	PASS
GCF_026788875.1_ASM2678887v1_genomic	Bacillus spizizenii	PASS
GCF_026788915.1_ASM2678891v1_genomic	Bacillus spizizenii	PASS
GCF_026789025.1_ASM2678902v1_genomic	Bacillus spizizenii	PASS
GCF_026789045.1_ASM2678904v1_genomic	Bacillus spizizenii	PASS
GCF_026789125.1_ASM2678912v1_genomic	Bacillus spizizenii	PASS
GCF_026789285.1_ASM2678928v1_genomic	Bacillus spizizenii	PASS
GCF_026789365.1_ASM2678936v1_genomic	Bacillus spizizenii	PASS
GCF_026789385.1_ASM2678938v1_genomic	Bacillus spizizenii	PASS
GCF_026789405.1_ASM2678940v1_genomic	Bacillus spizizenii	PASS
GCF_026789665.1_ASM2678966v1_genomic	Bacillus spizizenii	PASS
GCF_026789705.1_ASM2678970v1_genomic	Bacillus spizizenii	PASS
GCF_026789725.1_ASM2678972v1_genomic	Bacillus spizizenii	PASS
GCF_026789765.1_ASM2678976v1_genomic	Bacillus spizizenii	PASS
GCF_026789985.1_ASM2678998v1_genomic	Bacillus spizizenii	PASS
GCF_026790035.1_ASM2679003v1_genomic	Bacillus spizizenii	PASS
GCF_026790105.1_ASM2679010v1_genomic	Bacillus spizizenii	PASS
GCF_026790165.1_ASM2679016v1_genomic	Bacillus spizizenii	PASS
GCF_026790275.1_ASM2679027v1_genomic	Bacillus spizizenii	PASS
GCF_026790325.1_ASM2679032v1_genomic	Bacillus spizizenii	PASS
GCF_026790365.1_ASM2679036v1_genomic	Bacillus spizizenii	PASS
GCF_026790425.1_ASM2679042v1_genomic	Bacillus spizizenii	PASS
GCF_026790455.1_ASM2679045v1_genomic	Bacillus spizizenii	PASS
GCF_026790465.1_ASM2679046v1_genomic	Bacillus spizizenii	PASS
GCF_026790535.1_ASM2679053v1_genomic	Bacillus spizizenii	PASS
GCF_026790655.1_ASM2679065v1_genomic	Bacillus spizizenii	PASS
GCF_026790685.1_ASM2679068v1_genomic	Bacillus spizizenii	PASS
GCF_026790765.1_ASM2679076v1_genomic	Bacillus spizizenii	PASS
GCF_026790775.1_ASM2679077v1_genomic	Bacillus spizizenii	PASS
GCF_026790835.1_ASM2679083v1_genomic	Bacillus spizizenii	PASS
GCF_026790855.1_ASM2679085v1_genomic	Bacillus spizizenii	PASS
GCF_026790865.1_ASM2679086v1_genomic	Bacillus spizizenii	PASS
GCF_026791015.1_ASM2679101v1_genomic	Bacillus spizizenii	PASS
GCF_026791035.1_ASM2679103v1_genomic	Bacillus spizizenii	PASS
GCF_026791065.1_ASM2679106v1_genomic	Bacillus spizizenii	PASS
GCF_026791195.1_ASM2679119v1_genomic	Bacillus spizizenii	PASS
GCF_026791205.1_ASM2679120v1_genomic	Bacillus spizizenii	PASS
GCF_026791315.1_ASM2679131v1_genomic	Bacillus spizizenii	PASS
GCF_026791415.1_ASM2679141v1_genomic	Bacillus spizizenii	PASS
GCF_026791535.1_ASM2679153v1_genomic	Bacillus spizizenii	PASS
GCF_026791555.1_ASM2679155v1_genomic	Bacillus spizizenii	PASS
GCF_026791575.1_ASM2679157v1_genomic	Bacillus spizizenii	PASS
GCF_026791595.1_ASM2679159v1_genomic	Bacillus spizizenii	PASS
GCF_026791605.1_ASM2679160v1_genomic	Bacillus spizizenii	PASS
GCF_026791635.1_ASM2679163v1_genomic	Bacillus spizizenii	PASS
GCF_026791645.1_ASM2679164v1_genomic	Bacillus spizizenii	PASS
GCF_026792375.1_ASM2679237v1_genomic	Bacillus spizizenii	PASS
GCF_026792415.1_ASM2679241v1_genomic	Bacillus spizizenii	PASS
GCF_026792435.1_ASM2679243v1_genomic	Bacillus spizizenii	PASS
GCF_026792495.1_ASM2679249v1_genomic	Bacillus spizizenii	PASS
GCF_026792575.1_ASM2679257v1_genomic	Bacillus spizizenii	PASS
GCF_026792625.1_ASM2679262v1_genomic	Bacillus spizizenii	PASS
GCF_026792665.1_ASM2679266v1_genomic	Bacillus spizizenii	PASS
GCF_026792695.1_ASM2679269v1_genomic	Bacillus spizizenii	PASS
GCF_026792715.1_ASM2679271v1_genomic	Bacillus spizizenii	PASS
GCF_026792745.1_ASM2679274v1_genomic	Bacillus spizizenii	PASS
GCF_026792775.1_ASM2679277v1_genomic	Bacillus spizizenii	PASS
GCF_026792795.1_ASM2679279v1_genomic	Bacillus spizizenii	PASS
GCF_026792845.1_ASM2679284v1_genomic	Bacillus spizizenii	PASS
GCF_026792985.1_ASM2679298v1_genomic	Bacillus spizizenii	PASS
GCF_026793095.1_ASM2679309v1_genomic	Bacillus spizizenii	PASS
GCF_026793115.1_ASM2679311v1_genomic	Bacillus spizizenii	PASS
GCF_026793195.1_ASM2679319v1_genomic	Bacillus spizizenii	PASS
GCF_026793235.1_ASM2679323v1_genomic	Bacillus spizizenii	PASS
GCF_026793245.1_ASM2679324v1_genomic	Bacillus spizizenii	PASS
GCF_026793315.1_ASM2679331v1_genomic	Bacillus spizizenii	PASS
GCF_026793325.1_ASM2679332v1_genomic	Bacillus spizizenii	PASS
GCF_026793635.1_ASM2679363v1_genomic	Bacillus spizizenii	PASS
GCF_026793645.1_ASM2679364v1_genomic	Bacillus spizizenii	PASS
GCF_026793705.1_ASM2679370v1_genomic	Bacillus spizizenii	PASS
GCF_026793735.1_ASM2679373v1_genomic	Bacillus spizizenii	PASS
GCF_026793755.1_ASM2679375v1_genomic	Bacillus spizizenii	PASS
GCF_026793775.1_ASM2679377v1_genomic	Bacillus spizizenii	PASS
GCF_026793795.1_ASM2679379v1_genomic	Bacillus spizizenii	PASS
GCF_026793815.1_ASM2679381v1_genomic	Bacillus spizizenii	PASS
GCF_026793835.1_ASM2679383v1_genomic	Bacillus spizizenii	PASS
GCF_026794555.1_ASM2679455v1_genomic	Bacillus spizizenii	PASS
GCF_026794915.1_ASM2679491v1_genomic	Bacillus spizizenii	PASS
GCF_026795405.1_ASM2679540v1_genomic	Bacillus spizizenii	PASS
GCF_026795455.1_ASM2679545v1_genomic	Bacillus spizizenii	PASS
GCF_026795465.1_ASM2679546v1_genomic	Bacillus spizizenii	PASS
GCF_026795485.1_ASM2679548v1_genomic	Bacillus spizizenii	PASS
GCF_026795575.1_ASM2679557v1_genomic	Bacillus spizizenii	PASS
GCF_026795655.1_ASM2679565v1_genomic	Bacillus spizizenii	PASS
GCF_026795735.1_ASM2679573v1_genomic	Bacillus spizizenii	PASS
GCF_026795785.1_ASM2679578v1_genomic	Bacillus spizizenii	PASS
GCF_026795835.1_ASM2679583v1_genomic	Bacillus spizizenii	PASS
GCF_026795855.1_ASM2679585v1_genomic	Bacillus spizizenii	PASS
GCF_026795895.1_ASM2679589v1_genomic	Bacillus spizizenii	PASS
GCF_026796115.1_ASM2679611v1_genomic	Bacillus spizizenii	PASS
GCF_026796175.1_ASM2679617v1_genomic	Bacillus spizizenii	PASS
GCF_026796195.1_ASM2679619v1_genomic	Bacillus spizizenii	PASS
GCF_026796235.1_ASM2679623v1_genomic	Bacillus spizizenii	PASS
GCF_026796315.1_ASM2679631v1_genomic	Bacillus spizizenii	PASS
GCF_026796335.1_ASM2679633v1_genomic	Bacillus spizizenii	PASS
GCF_026796345.1_ASM2679634v1_genomic	Bacillus spizizenii	PASS
GCF_026796375.1_ASM2679637v1_genomic	Bacillus spizizenii	PASS
GCF_026796535.1_ASM2679653v1_genomic	Bacillus spizizenii	PASS
GCF_026796645.1_ASM2679664v1_genomic	Bacillus spizizenii	PASS
GCF_026796695.1_ASM2679669v1_genomic	Bacillus spizizenii	PASS
GCF_026796735.1_ASM2679673v1_genomic	Bacillus spizizenii	PASS
GCF_028743795.1_ASM2874379v1_genomic	Bacillus spizizenii	PASS
GCF_031316495.1_ASM3131649v1_genomic	Bacillus spizizenii	PASS
GCF_900445425.1_52087_D01_genomic	Bacillus spizizenii	PASS
GCF_000507145.1_KCTC_13622_01_genomic	Bacillus tequilensis	PASS
GCF_012225885.1_ASM1222588v1_genomic	Bacillus tequilensis	PASS
GCF_013332435.1_ASM1333243v1_genomic	Bacillus tequilensis	PASS
GCF_031317525.1_ASM3131752v1_genomic	Bacillus tequilensis	PASS
GCF_900445435.1_59178_C01_genomic	Bacillus tequilensis	PASS
GCF_000165925.1_ASM16592v1_genomic	Bacillus atrophaeus	PASS
GCF_000204685.1_ASM20468v2_genomic	Bacillus atrophaeus	PASS
GCF_000204705.1_ASM20470v2_genomic	Bacillus atrophaeus	PASS
GCF_000204725.1_ASM20472v2_genomic	Bacillus atrophaeus	PASS
GCF_000204745.1_ASM20474v2_genomic	Bacillus atrophaeus	PASS
GCF_000204765.1_ASM20476v2_genomic	Bacillus atrophaeus	PASS
GCF_000204785.1_ASM20478v2_genomic	Bacillus atrophaeus	PASS
GCF_000204805.1_ASM20480v2_genomic	Bacillus atrophaeus	PASS
GCF_000204825.1_ASM20482v2_genomic	Bacillus atrophaeus	PASS
GCF_000204845.1_ASM20484v2_genomic	Bacillus atrophaeus	PASS
GCF_000204865.1_ASM20486v2_genomic	Bacillus atrophaeus	PASS
GCF_000204885.1_ASM20488v2_genomic	Bacillus atrophaeus	PASS
GCF_000204905.1_ASM20490v2_genomic	Bacillus atrophaeus	PASS
GCF_000264395.1_C89_version_1_genomic	Bacillus atrophaeus	PASS
GCF_000385965.2_ASM38596v2_genomic	Bacillus atrophaeus	PASS
GCF_000742675.1_ASM74267v1_genomic	Bacillus atrophaeus	PASS
GCF_000743235.1_BSV_genomic	Bacillus atrophaeus	PASS
GCF_000983035.1_930029_genomic	Bacillus atrophaeus	PASS
GCF_001584335.1_ASM158433v1_genomic	Bacillus atrophaeus	PASS
GCF_001587405.1_B4144_genomic	Bacillus atrophaeus	PASS
GCF_001591925.1_ASM159192v1_genomic	Bacillus atrophaeus	PASS
GCF_001639965.1_ASM163996v1_genomic	Bacillus atrophaeus	PASS
GCF_002173495.1_ASM217349v1_genomic	Bacillus atrophaeus	PASS
GCF_002243495.1_ASM224349v1_genomic	Bacillus atrophaeus	PASS
GCF_002998055.1_ASM299805v1_genomic	Bacillus atrophaeus	PASS
GCF_002998075.1_ASM299807v1_genomic	Bacillus atrophaeus	PASS
GCF_002998135.1_ASM299813v1_genomic	Bacillus atrophaeus	PASS
GCF_003003625.1_ASM300362v1_genomic	Bacillus atrophaeus	PASS
GCF_003003645.1_ASM300364v1_genomic	Bacillus atrophaeus	PASS
GCF_006539905.1_ASM653990v1_genomic	Bacillus atrophaeus	PASS
GCF_008682345.1_ASM868234v1_genomic	Bacillus atrophaeus	PASS
GCF_015845745.1_ASM1584574v1_genomic	Bacillus atrophaeus	PASS
GCF_016469025.1_ASM1646902v1_genomic	Bacillus atrophaeus	PASS
GCF_018140555.1_ASM1814055v1_genomic	Bacillus atrophaeus	PASS
GCF_018916725.1_ASM1891672v1_genomic	Bacillus atrophaeus	PASS
GCF_019443725.1_ASM1944372v1_genomic	Bacillus atrophaeus	PASS
GCF_022359775.1_ASM2235977v1_genomic	Bacillus atrophaeus	PASS
GCF_023712925.1_ASM2371292v1_genomic	Bacillus atrophaeus	PASS
GCF_024757965.1_ASM2475796v1_genomic	Bacillus atrophaeus	PASS
GCF_026789205.1_ASM2678920v1_genomic	Bacillus atrophaeus	PASS
GCF_026789875.1_ASM2678987v1_genomic	Bacillus atrophaeus	PASS
GCF_026791715.1_ASM2679171v1_genomic	Bacillus atrophaeus	PASS
GCF_026791755.1_ASM2679175v1_genomic	Bacillus atrophaeus	PASS
GCF_026791775.1_ASM2679177v1_genomic	Bacillus atrophaeus	PASS
GCF_026791795.1_ASM2679179v1_genomic	Bacillus atrophaeus	PASS
GCF_026791805.1_ASM2679180v1_genomic	Bacillus atrophaeus	PASS
GCF_026791875.1_ASM2679187v1_genomic	Bacillus atrophaeus	PASS
GCF_026791895.1_ASM2679189v1_genomic	Bacillus atrophaeus	PASS
GCF_026791935.1_ASM2679193v1_genomic	Bacillus atrophaeus	PASS
GCF_026791955.1_ASM2679195v1_genomic	Bacillus atrophaeus	PASS
GCF_026791985.1_ASM2679198v1_genomic	Bacillus atrophaeus	PASS
GCF_026793355.1_ASM2679335v1_genomic	Bacillus atrophaeus	PASS
GCF_026793375.1_ASM2679337v1_genomic	Bacillus atrophaeus	PASS
GCF_026793395.1_ASM2679339v1_genomic	Bacillus atrophaeus	PASS
GCF_026793405.1_ASM2679340v1_genomic	Bacillus atrophaeus	PASS
GCF_026793415.1_ASM2679341v1_genomic	Bacillus atrophaeus	PASS
GCF_026793455.1_ASM2679345v1_genomic	Bacillus atrophaeus	PASS
GCF_026793475.1_ASM2679347v1_genomic	Bacillus atrophaeus	PASS
GCF_026793505.1_ASM2679350v1_genomic	Bacillus atrophaeus	PASS
GCF_026793515.1_ASM2679351v1_genomic	Bacillus atrophaeus	PASS
GCF_026793605.1_ASM2679360v1_genomic	Bacillus atrophaeus	PASS
GCF_026793855.1_ASM2679385v1_genomic	Bacillus atrophaeus	PASS
GCF_026793875.1_ASM2679387v1_genomic	Bacillus atrophaeus	PASS
GCF_026793895.1_ASM2679389v1_genomic	Bacillus atrophaeus	PASS
GCF_026793905.1_ASM2679390v1_genomic	Bacillus atrophaeus	PASS
GCF_026793915.1_ASM2679391v1_genomic	Bacillus atrophaeus	PASS
GCF_026794315.1_ASM2679431v1_genomic	Bacillus atrophaeus	PASS
GCF_026794335.1_ASM2679433v1_genomic	Bacillus atrophaeus	PASS
GCF_026794355.1_ASM2679435v1_genomic	Bacillus atrophaeus	PASS
GCF_026794375.1_ASM2679437v1_genomic	Bacillus atrophaeus	PASS
GCF_026794405.1_ASM2679440v1_genomic	Bacillus atrophaeus	PASS
GCF_026794435.1_ASM2679443v1_genomic	Bacillus atrophaeus	PASS
GCF_026794455.1_ASM2679445v1_genomic	Bacillus atrophaeus	PASS
GCF_026794475.1_ASM2679447v1_genomic	Bacillus atrophaeus	PASS
GCF_026794485.1_ASM2679448v1_genomic	Bacillus atrophaeus	PASS
GCF_026794575.1_ASM2679457v1_genomic	Bacillus atrophaeus	PASS
GCF_026794605.1_ASM2679460v1_genomic	Bacillus atrophaeus	PASS
GCF_026795145.1_ASM2679514v1_genomic	Bacillus atrophaeus	PASS
GCF_026795175.1_ASM2679517v1_genomic	Bacillus atrophaeus	PASS
GCF_026795185.1_ASM2679518v1_genomic	Bacillus atrophaeus	PASS
GCF_026795215.1_ASM2679521v1_genomic	Bacillus atrophaeus	PASS
GCF_026795235.1_ASM2679523v1_genomic	Bacillus atrophaeus	PASS
GCF_026795255.1_ASM2679525v1_genomic	Bacillus atrophaeus	PASS
GCF_026795295.1_ASM2679529v1_genomic	Bacillus atrophaeus	PASS
GCF_026795615.1_ASM2679561v1_genomic	Bacillus atrophaeus	PASS
GCF_026796635.1_ASM2679663v1_genomic	Bacillus atrophaeus	PASS
GCF_029541525.1_ASM2954152v1_genomic	Bacillus atrophaeus	PASS
GCF_029581095.1_ASM2958109v1_genomic	Bacillus atrophaeus	PASS
GCF_030284675.1_ASM3028467v1_genomic	Bacillus atrophaeus	PASS
GCF_030817145.1_ASM3081714v1_genomic	Bacillus atrophaeus	PASS
GCF_031317235.1_ASM3131723v1_genomic	Bacillus atrophaeus	PASS
GCF_031834575.1_ASM3183457v1_genomic	Bacillus atrophaeus	PASS
GCF_032460565.1_ASM3246056v1_genomic	Bacillus atrophaeus	PASS
GCF_000008425.1_ASM842v1_genomic	Bacillus licheniformis	PASS
GCF_000011645.1_ASM1164v1_genomic	Bacillus licheniformis	PASS
GCF_000258125.2_ASM25812v2_genomic	Bacillus licheniformis	PASS
GCF_000260535.1_Blic5_genomic	Bacillus licheniformis	PASS
GCF_000260555.1_Blic10_genomic	Bacillus licheniformis	PASS
GCF_000315975.1_mt6_genomic	Bacillus licheniformis	PASS
GCF_000477395.2_CGB52_genomic	Bacillus licheniformis	PASS
GCF_000603965.1_Bacillus_licheniformis_strain_F1-1_genomic	Bacillus licheniformis	PASS
GCF_000603985.1_Bacillus_licheniformis_strain_F2-1_genomic	Bacillus licheniformis	PASS
GCF_000695465.1_3F_genomic	Bacillus licheniformis	PASS
GCF_000948275.1_BFA_12_A_genomic	Bacillus licheniformis	PASS
GCF_001507775.1_LI17339_genomic	Bacillus licheniformis	PASS
GCF_001587195.1_B4092_genomic	Bacillus licheniformis	PASS
GCF_001587285.1_B4090_genomic	Bacillus licheniformis	PASS
GCF_001587315.1_B4091_genomic	Bacillus licheniformis	PASS
GCF_001587355.1_B4164_genomic	Bacillus licheniformis	PASS
GCF_001596055.1_ASM159605v1_genomic	Bacillus licheniformis	PASS
GCF_001642595.1_ASM164259v1_genomic	Bacillus licheniformis	PASS
GCF_001662975.1_ASM166297v1_genomic	Bacillus licheniformis	PASS
GCF_001726125.1_ASM172612v1_genomic	Bacillus licheniformis	PASS
GCF_001876545.1_ASM187654v1_genomic	Bacillus licheniformis	PASS
GCF_001876555.1_ASM187655v1_genomic	Bacillus licheniformis	PASS
GCF_001876575.1_ASM187657v1_genomic	Bacillus licheniformis	PASS
GCF_001876655.1_ASM187665v1_genomic	Bacillus licheniformis	PASS
GCF_001896285.1_ASM189628v1_genomic	Bacillus licheniformis	PASS
GCF_001896295.1_ASM189629v1_genomic	Bacillus licheniformis	PASS
GCF_001896305.1_ASM189630v1_genomic	Bacillus licheniformis	PASS
GCF_001901555.1_ASM190155v1_genomic	Bacillus licheniformis	PASS
GCF_001914255.1_ASM191425v1_genomic	Bacillus licheniformis	PASS
GCF_001925055.1_ASM192505v1_genomic	Bacillus licheniformis	PASS
GCF_001925115.1_ASM192511v1_genomic	Bacillus licheniformis	PASS
GCF_001939525.1_ASM193952v1_genomic	Bacillus licheniformis	PASS
GCF_002074075.1_ASM207407v1_genomic	Bacillus licheniformis	PASS
GCF_002074095.1_ASM207409v1_genomic	Bacillus licheniformis	PASS
GCF_002074115.1_ASM207411v1_genomic	Bacillus licheniformis	PASS
GCF_002074135.1_ASM207413v1_genomic	Bacillus licheniformis	PASS
GCF_002173675.1_ASM217367v1_genomic	Bacillus licheniformis	PASS
GCF_002174255.1_ASM217425v1_genomic	Bacillus licheniformis	PASS
GCF_002236895.1_ASM223689v1_genomic	Bacillus licheniformis	PASS
GCF_002271465.1_assembly-7727_v1_genomic	Bacillus licheniformis	PASS
GCF_002271485.1_assembly-7708_v1_genomic	Bacillus licheniformis	PASS
GCF_002271715.1_assembly-7716_v1_genomic	Bacillus licheniformis	PASS
GCF_002271725.1_assembly-7715_v1_genomic	Bacillus licheniformis	PASS
GCF_002272005.1_assembly-7525_v1_genomic	Bacillus licheniformis	PASS
GCF_002272305.1_assembly-7714_v1_genomic	Bacillus licheniformis	PASS
GCF_002272315.1_assembly-7713_v1_genomic	Bacillus licheniformis	PASS
GCF_002272335.1_assembly-7712_v1_genomic	Bacillus licheniformis	PASS
GCF_002272365.1_assembly-7711_v1_genomic	Bacillus licheniformis	PASS
GCF_002272395.1_assembly-7709_v1_genomic	Bacillus licheniformis	PASS
GCF_002272455.1_assembly-7701_v1_genomic	Bacillus licheniformis	PASS
GCF_002276325.1_ASM227632v1_genomic	Bacillus licheniformis	PASS
GCF_002287385.1_ASM228738v1_genomic	Bacillus licheniformis	PASS
GCF_002504325.1_ASM250432v1_genomic	Bacillus licheniformis	PASS
GCF_002860295.1_ASM286029v1_genomic	Bacillus licheniformis	PASS
GCF_002933795.1_ASM293379v1_genomic	Bacillus licheniformis	PASS
GCF_002953475.1_ASM295347v1_genomic	Bacillus licheniformis	PASS
GCF_002966955.1_ASM296695v1_genomic	Bacillus licheniformis	PASS
GCF_003024435.1_ASM302443v1_genomic	Bacillus licheniformis	PASS
GCF_003253815.1_ASM325381v1_genomic	Bacillus licheniformis	PASS
GCF_003339545.1_ASM333954v1_genomic	Bacillus licheniformis	PASS
GCF_003474315.1_ASM347431v1_genomic	Bacillus licheniformis	PASS
GCF_003583315.1_ASM358331v1_genomic	Bacillus licheniformis	PASS
GCF_003595625.1_ASM359562v1_genomic	Bacillus licheniformis	PASS
GCF_003606405.1_ASM360640v1_genomic	Bacillus licheniformis	PASS
GCF_003859785.1_ASM385978v1_genomic	Bacillus licheniformis	PASS
GCF_003952865.1_ASM395286v1_genomic	Bacillus licheniformis	PASS
GCF_004078545.1_ASM407854v1_genomic	Bacillus licheniformis	PASS
GCF_004101525.1_ASM410152v1_genomic	Bacillus licheniformis	PASS
GCF_004103575.1_ASM410357v1_genomic	Bacillus licheniformis	PASS
GCF_004119755.1_ASM411975v1_genomic	Bacillus licheniformis	PASS
GCF_004119795.1_ASM411979v1_genomic	Bacillus licheniformis	PASS
GCF_004362235.1_ASM436223v1_genomic	Bacillus licheniformis	PASS
GCF_004526275.1_ASM452627v1_genomic	Bacillus licheniformis	PASS
GCF_006094335.1_ASM609433v1_genomic	Bacillus licheniformis	PASS
GCF_006494795.1_ASM649479v1_genomic	Bacillus licheniformis	PASS
GCF_006974025.1_ASM697402v1_genomic	Bacillus licheniformis	PASS
GCF_007673185.1_ASM767318v1_genomic	Bacillus licheniformis	PASS
GCF_007673855.1_ASM767385v1_genomic	Bacillus licheniformis	PASS
GCF_007676795.1_ASM767679v1_genomic	Bacillus licheniformis	PASS
GCF_007677765.1_ASM767776v1_genomic	Bacillus licheniformis	PASS
GCF_007679605.1_ASM767960v1_genomic	Bacillus licheniformis	PASS
GCF_007830775.1_ASM783077v1_genomic	Bacillus licheniformis	PASS
GCF_007830795.1_ASM783079v1_genomic	Bacillus licheniformis	PASS
GCF_007830815.1_ASM783081v1_genomic	Bacillus licheniformis	PASS
GCF_007830835.1_ASM783083v1_genomic	Bacillus licheniformis	PASS
GCF_007830935.1_ASM783093v1_genomic	Bacillus licheniformis	PASS
GCF_007830975.1_ASM783097v1_genomic	Bacillus licheniformis	PASS
GCF_007830995.1_ASM783099v1_genomic	Bacillus licheniformis	PASS
GCF_007831015.1_ASM783101v1_genomic	Bacillus licheniformis	PASS
GCF_007831035.1_ASM783103v1_genomic	Bacillus licheniformis	PASS
GCF_007831065.1_ASM783106v1_genomic	Bacillus licheniformis	PASS
GCF_007831115.1_ASM783111v1_genomic	Bacillus licheniformis	PASS
GCF_007831145.1_ASM783114v1_genomic	Bacillus licheniformis	PASS
GCF_007831215.1_ASM783121v1_genomic	Bacillus licheniformis	PASS
GCF_007831235.1_ASM783123v1_genomic	Bacillus licheniformis	PASS
GCF_007831245.1_ASM783124v1_genomic	Bacillus licheniformis	PASS
GCF_007831255.1_ASM783125v1_genomic	Bacillus licheniformis	PASS
GCF_007831295.1_ASM783129v1_genomic	Bacillus licheniformis	PASS
GCF_007831325.1_ASM783132v1_genomic	Bacillus licheniformis	PASS
GCF_007831385.1_ASM783138v1_genomic	Bacillus licheniformis	PASS
GCF_007831435.1_ASM783143v1_genomic	Bacillus licheniformis	PASS
GCF_007831455.1_ASM783145v1_genomic	Bacillus licheniformis	PASS
GCF_007831465.1_ASM783146v1_genomic	Bacillus licheniformis	PASS
GCF_007831495.1_ASM783149v1_genomic	Bacillus licheniformis	PASS
GCF_007831515.1_ASM783151v1_genomic	Bacillus licheniformis	PASS
GCF_007831575.1_ASM783157v1_genomic	Bacillus licheniformis	PASS
GCF_007831615.1_ASM783161v1_genomic	Bacillus licheniformis	PASS
GCF_007831635.1_ASM783163v1_genomic	Bacillus licheniformis	PASS
GCF_007831655.1_ASM783165v1_genomic	Bacillus licheniformis	PASS
GCF_007831665.1_ASM783166v1_genomic	Bacillus licheniformis	PASS
GCF_007831695.1_ASM783169v1_genomic	Bacillus licheniformis	PASS
GCF_007831705.1_ASM783170v1_genomic	Bacillus licheniformis	PASS
GCF_007831735.1_ASM783173v1_genomic	Bacillus licheniformis	PASS
GCF_007831745.1_ASM783174v1_genomic	Bacillus licheniformis	PASS
GCF_007831755.1_ASM783175v1_genomic	Bacillus licheniformis	PASS
GCF_007831795.1_ASM783179v1_genomic	Bacillus licheniformis	PASS
GCF_007831815.1_ASM783181v1_genomic	Bacillus licheniformis	PASS
GCF_007831835.1_ASM783183v1_genomic	Bacillus licheniformis	PASS
GCF_007831875.1_ASM783187v1_genomic	Bacillus licheniformis	PASS
GCF_007831885.1_ASM783188v1_genomic	Bacillus licheniformis	PASS
GCF_007831965.1_ASM783196v1_genomic	Bacillus licheniformis	PASS
GCF_007831975.1_ASM783197v1_genomic	Bacillus licheniformis	PASS
GCF_007832035.1_ASM783203v1_genomic	Bacillus licheniformis	PASS
GCF_007832045.1_ASM783204v1_genomic	Bacillus licheniformis	PASS
GCF_007832095.1_ASM783209v1_genomic	Bacillus licheniformis	PASS
GCF_007832135.1_ASM783213v1_genomic	Bacillus licheniformis	PASS
GCF_007832155.1_ASM783215v1_genomic	Bacillus licheniformis	PASS
GCF_007832175.1_ASM783217v1_genomic	Bacillus licheniformis	PASS
GCF_007832195.1_ASM783219v1_genomic	Bacillus licheniformis	PASS
GCF_007832215.1_ASM783221v1_genomic	Bacillus licheniformis	PASS
GCF_007832235.1_ASM783223v1_genomic	Bacillus licheniformis	PASS
GCF_007832255.1_ASM783225v1_genomic	Bacillus licheniformis	PASS
GCF_007832275.1_ASM783227v1_genomic	Bacillus licheniformis	PASS
GCF_007832295.1_ASM783229v1_genomic	Bacillus licheniformis	PASS
GCF_007832335.1_ASM783233v1_genomic	Bacillus licheniformis	PASS
GCF_007832345.1_ASM783234v1_genomic	Bacillus licheniformis	PASS
GCF_007832375.1_ASM783237v1_genomic	Bacillus licheniformis	PASS
GCF_007832395.1_ASM783239v1_genomic	Bacillus licheniformis	PASS
GCF_007832425.1_ASM783242v1_genomic	Bacillus licheniformis	PASS
GCF_007832465.1_ASM783246v1_genomic	Bacillus licheniformis	PASS
GCF_007832495.1_ASM783249v1_genomic	Bacillus licheniformis	PASS
GCF_007832515.1_ASM783251v1_genomic	Bacillus licheniformis	PASS
GCF_007855455.1_ASM785545v1_genomic	Bacillus licheniformis	PASS
GCF_007994175.1_ASM799417v1_genomic	Bacillus licheniformis	PASS
GCF_007994255.1_ASM799425v1_genomic	Bacillus licheniformis	PASS
GCF_007994275.1_ASM799427v1_genomic	Bacillus licheniformis	PASS
GCF_007994285.1_ASM799428v1_genomic	Bacillus licheniformis	PASS
GCF_007994305.1_ASM799430v1_genomic	Bacillus licheniformis	PASS
GCF_007994355.1_ASM799435v1_genomic	Bacillus licheniformis	PASS
GCF_007994365.1_ASM799436v1_genomic	Bacillus licheniformis	PASS
GCF_007994375.1_ASM799437v1_genomic	Bacillus licheniformis	PASS
GCF_007994435.1_ASM799443v1_genomic	Bacillus licheniformis	PASS
GCF_007994455.1_ASM799445v1_genomic	Bacillus licheniformis	PASS
GCF_007994485.1_ASM799448v1_genomic	Bacillus licheniformis	PASS
GCF_008368405.1_ASM836840v1_genomic	Bacillus licheniformis	PASS
GCF_008368415.1_ASM836841v1_genomic	Bacillus licheniformis	PASS
GCF_008368425.1_ASM836842v1_genomic	Bacillus licheniformis	PASS
GCF_008368435.1_ASM836843v1_genomic	Bacillus licheniformis	PASS
GCF_008368505.1_ASM836850v1_genomic	Bacillus licheniformis	PASS
GCF_008368515.1_ASM836851v1_genomic	Bacillus licheniformis	PASS
GCF_009662395.1_ASM966239v1_genomic	Bacillus licheniformis	PASS
GCF_009965255.1_ASM996525v1_genomic	Bacillus licheniformis	PASS
GCF_010578005.1_ASM1057800v1_genomic	Bacillus licheniformis	PASS
GCF_010578075.1_ASM1057807v1_genomic	Bacillus licheniformis	PASS
GCF_013520855.1_ASM1352085v1_genomic	Bacillus licheniformis	PASS
GCF_014673515.1_ASM1467351v1_genomic	Bacillus licheniformis	PASS
GCF_015552545.1_ASM1555254v1_genomic	Bacillus licheniformis	PASS
GCF_015557885.1_ASM1555788v1_genomic	Bacillus licheniformis	PASS
GCF_015559765.1_ASM1555976v1_genomic	Bacillus licheniformis	PASS
GCF_015689075.1_ASM1568907v1_genomic	Bacillus licheniformis	PASS
GCF_015845325.1_ASM1584532v1_genomic	Bacillus licheniformis	PASS
GCF_016026835.1_ASM1602683v1_genomic	Bacillus licheniformis	PASS
GCF_016126875.1_ASM1612687v1_genomic	Bacillus licheniformis	PASS
GCF_016629635.1_ASM1662963v1_genomic	Bacillus licheniformis	PASS
GCF_016902155.1_ASM1690215v1_genomic	Bacillus licheniformis	PASS
GCF_017338795.1_ASM1733879v1_genomic	Bacillus licheniformis	PASS
GCF_018274685.1_ASM1827468v1_genomic	Bacillus licheniformis	PASS
GCF_018332815.1_ASM1833281v1_genomic	Bacillus licheniformis	PASS
GCF_018332835.1_ASM1833283v1_genomic	Bacillus licheniformis	PASS
GCF_018332855.1_ASM1833285v1_genomic	Bacillus licheniformis	PASS
GCF_018587905.1_ASM1858790v1_genomic	Bacillus licheniformis	PASS
GCF_019036885.1_ASM1903688v1_genomic	Bacillus licheniformis	PASS
GCF_019037225.1_ASM1903722v1_genomic	Bacillus licheniformis	PASS
GCF_019037245.1_ASM1903724v1_genomic	Bacillus licheniformis	PASS
GCF_019037425.1_ASM1903742v1_genomic	Bacillus licheniformis	PASS
GCF_019448535.1_ASM1944853v1_genomic	Bacillus licheniformis	PASS
GCF_019880595.1_ASM1988059v1_genomic	Bacillus licheniformis	PASS
GCF_020177515.1_ASM2017751v1_genomic	Bacillus licheniformis	PASS
GCF_020686785.1_ASM2068678v1_genomic	Bacillus licheniformis	PASS
GCF_020686805.1_ASM2068680v1_genomic	Bacillus licheniformis	PASS
GCF_020686825.1_ASM2068682v1_genomic	Bacillus licheniformis	PASS
GCF_020686845.1_ASM2068684v1_genomic	Bacillus licheniformis	PASS
GCF_021045125.1_ASM2104512v1_genomic	Bacillus licheniformis	PASS
GCF_021045185.1_ASM2104518v1_genomic	Bacillus licheniformis	PASS
GCF_022630555.1_ASM2263055v1_genomic	Bacillus licheniformis	PASS
GCF_022700915.1_ASM2270091v1_genomic	Bacillus licheniformis	PASS
GCF_023713045.1_ASM2371304v1_genomic	Bacillus licheniformis	PASS
GCF_023713085.1_ASM2371308v1_genomic	Bacillus licheniformis	PASS
GCF_023713165.1_ASM2371316v1_genomic	Bacillus licheniformis	PASS
GCF_023713725.1_ASM2371372v1_genomic	Bacillus licheniformis	PASS
GCF_023713785.1_ASM2371378v1_genomic	Bacillus licheniformis	PASS
GCF_023714845.1_ASM2371484v1_genomic	Bacillus licheniformis	PASS
GCF_024134745.1_ASM2413474v1_genomic	Bacillus licheniformis	PASS
GCF_024294685.1_ASM2429468v1_genomic	Bacillus licheniformis	PASS
GCF_024463755.1_ASM2446375v1_genomic	Bacillus licheniformis	PASS
GCF_024649545.1_ASM2464954v1_genomic	Bacillus licheniformis	PASS
GCF_025685785.1_ASM2568578v1_genomic	Bacillus licheniformis	PASS
GCF_026788135.1_ASM2678813v1_genomic	Bacillus licheniformis	PASS
GCF_026788315.1_ASM2678831v1_genomic	Bacillus licheniformis	PASS
GCF_026789185.1_ASM2678918v1_genomic	Bacillus licheniformis	PASS
GCF_026789605.1_ASM2678960v1_genomic	Bacillus licheniformis	PASS
GCF_026790675.1_ASM2679067v1_genomic	Bacillus licheniformis	PASS
GCF_026791975.1_ASM2679197v1_genomic	Bacillus licheniformis	PASS
GCF_026793035.1_ASM2679303v1_genomic	Bacillus licheniformis	PASS
GCF_026795695.1_ASM2679569v1_genomic	Bacillus licheniformis	PASS
GCF_026795915.1_ASM2679591v1_genomic	Bacillus licheniformis	PASS
GCF_026796015.1_ASM2679601v1_genomic	Bacillus licheniformis	PASS
GCF_026796095.1_ASM2679609v1_genomic	Bacillus licheniformis	PASS
GCF_026796135.1_ASM2679613v1_genomic	Bacillus licheniformis	PASS
GCF_026796245.1_ASM2679624v1_genomic	Bacillus licheniformis	PASS
GCF_026799625.1_ASM2679962v1_genomic	Bacillus licheniformis	PASS
GCF_027685585.1_ASM2768558v1_genomic	Bacillus licheniformis	PASS
GCF_028331355.1_ASM2833135v1_genomic	Bacillus licheniformis	PASS
GCF_028532465.1_ASM2853246v1_genomic	Bacillus licheniformis	PASS
GCF_028857215.1_ASM2885721v1_genomic	Bacillus licheniformis	PASS
GCF_028857225.1_ASM2885722v1_genomic	Bacillus licheniformis	PASS
GCF_028857235.1_ASM2885723v1_genomic	Bacillus licheniformis	PASS
GCF_028857245.1_ASM2885724v1_genomic	Bacillus licheniformis	PASS
GCF_028857255.1_ASM2885725v1_genomic	Bacillus licheniformis	PASS
GCF_028857315.1_ASM2885731v1_genomic	Bacillus licheniformis	PASS
GCF_028857325.1_ASM2885732v1_genomic	Bacillus licheniformis	PASS
GCF_028857335.1_ASM2885733v1_genomic	Bacillus licheniformis	PASS
GCF_028857345.1_ASM2885734v1_genomic	Bacillus licheniformis	PASS
GCF_028857415.1_ASM2885741v1_genomic	Bacillus licheniformis	PASS
GCF_028857435.1_ASM2885743v1_genomic	Bacillus licheniformis	PASS
GCF_028857445.1_ASM2885744v1_genomic	Bacillus licheniformis	PASS
GCF_028857455.1_ASM2885745v1_genomic	Bacillus licheniformis	PASS
GCF_028857475.1_ASM2885747v1_genomic	Bacillus licheniformis	PASS
GCF_028857515.1_ASM2885751v1_genomic	Bacillus licheniformis	PASS
GCF_028857565.1_ASM2885756v1_genomic	Bacillus licheniformis	PASS
GCF_028857615.1_ASM2885761v1_genomic	Bacillus licheniformis	PASS
GCF_028857645.1_ASM2885764v1_genomic	Bacillus licheniformis	PASS
GCF_028857665.1_ASM2885766v1_genomic	Bacillus licheniformis	PASS
GCF_029857595.1_ASM2985759v1_genomic	Bacillus licheniformis	PASS
GCF_029958265.1_ASM2995826v1_genomic	Bacillus licheniformis	PASS
GCF_030177855.1_ASM3017785v1_genomic	Bacillus licheniformis	PASS
GCF_030222455.1_ASM3022245v1_genomic	Bacillus licheniformis	PASS
GCF_030284405.1_ASM3028440v1_genomic	Bacillus licheniformis	PASS
GCF_030348625.1_ASM3034862v1_genomic	Bacillus licheniformis	PASS
GCF_030501475.1_ASM3050147v1_genomic	Bacillus licheniformis	PASS
GCF_030520185.1_ASM3052018v1_genomic	Bacillus licheniformis	PASS
GCF_031157615.1_ASM3115761v1_genomic	Bacillus licheniformis	PASS
GCF_900110715.1_IMG-taxon_2623620452_annotated_assembly_genomic	Bacillus licheniformis	PASS
GCF_900171545.1_Blich_genomic	Bacillus licheniformis	PASS
GCF_900318095.1_Rumen_uncultured_genome_RUG346_genomic	Bacillus licheniformis	PASS
GCF_900445385.1_52601_A01_genomic	Bacillus licheniformis	PASS
GCF_902386215.1_UHGG_MGYG-HGUT-02357_genomic	Bacillus licheniformis	PASS
GCF_903970875.1_ASM90397087v1_genomic	Bacillus licheniformis	PASS
GCF_910575305.1_MGBC000203_genomic	Bacillus licheniformis	PASS
GCF_932751165.1_Bacillus_licheniformis_DSM111625_genomic	Bacillus licheniformis	PASS
GCF_944993205.1_assembly_Coobra_isolate_9_genomic	Bacillus licheniformis	PASS
GCF_944993295.1_assembly_Coobra_isolate_12_genomic	Bacillus licheniformis	PASS
GCF_944993315.1_assembly_Coobra_isolate_15_genomic	Bacillus licheniformis	PASS
GCF_944993335.1_assembly_Coobra_isolate_4_genomic	Bacillus licheniformis	PASS
GCF_944993355.1_assembly_Coobra_isolate_3_genomic	Bacillus licheniformis	PASS
GCF_944993375.1_assembly_Coobra_isolate_6_genomic	Bacillus licheniformis	PASS
GCF_944993385.1_assembly_Coobra_isolate_8_genomic	Bacillus licheniformis	PASS
GCF_944993405.1_assembly_Coobra_isolate_7_genomic	Bacillus licheniformis	PASS
GCF_944993425.1_assembly_Coobra_isolate_2_genomic	Bacillus licheniformis	PASS
GCF_944993445.1_assembly_Coobra_isolate_16_genomic	Bacillus licheniformis	PASS
GCF_945957275.1_plastics_colonisation_sample_126_genomic	Bacillus licheniformis	PASS
GCF_945957445.1_plastics_colonisation_sample_123_genomic	Bacillus licheniformis	PASS
GCF_945957455.1_plastics_colonisation_sample_135_genomic	Bacillus licheniformis	PASS
GCF_948330375.1_WGS_ASS_CCMM_B943_genomic	Bacillus licheniformis	PASS
GCF_000262045.1_KCTC_13613_01_genomic	Bacillus siamensis	PASS
GCF_000798615.1_ASM79861v1_genomic	Bacillus siamensis	PASS
GCF_000966575.1_ASM96657v1_genomic	Bacillus siamensis	PASS
GCF_001662915.1_ASM166291v1_genomic	Bacillus siamensis	PASS
GCF_002271775.1_assembly-7551_v1_genomic	Bacillus siamensis	PASS
GCF_002850535.1_ASM285053v1_genomic	Bacillus siamensis	PASS
GCF_016313165.1_ASM1631316v1_genomic	Bacillus siamensis	PASS
GCF_024453785.1_ASM2445378v1_genomic	Bacillus siamensis	PASS
GCF_026014025.1_ASM2601402v1_genomic	Bacillus siamensis	PASS
GCF_027497645.1_ASM2749764v1_genomic	Bacillus siamensis	PASS
GCF_032469975.1_ASM3246997v1_genomic	Bacillus siamensis	PASS
GCF_029772985.1_ASM2977298v1_genomic	Bacillus stercoris	CheckM_FAIL
GCF_029958885.1_ASM2995888v1_genomic	Bacillus stercoris	CheckM_FAIL
GCF_000738015.1_ASM73801v1_genomic	Bacillus stercoris	PASS
GCF_020551885.1_ASM2055188v1_genomic	Bacillus stercoris	PASS
GCF_022814905.1_ASM2281490v1_genomic	Bacillus stercoris	PASS
GCF_023703335.1_ASM2370333v1_genomic	Bacillus stercoris	PASS
GCF_030219925.1_ASM3021992v1_genomic	Bacillus stercoris	PASS
GCF_030315825.1_ASM3031582v1_genomic	Bacillus stercoris	PASS
GCF_030553605.1_ASM3055360v1_genomic	Bacillus stercoris	PASS
GCF_030846295.1_ASM3084629v1_genomic	Bacillus stercoris	PASS
GCF_002811125.1_ASM281112v1_genomic	Bacillus vallismortis	PASS
GCF_003667885.1_ASM366788v1_genomic	Bacillus vallismortis	PASS
GCF_004116955.1_ASM411695v1_genomic	Bacillus vallismortis	PASS
GCF_015845775.1_ASM1584577v1_genomic	Bacillus vallismortis	PASS
GCF_023920485.1_ASM2392048v1_genomic	Bacillus vallismortis	GTDB_FAIL
GCF_023955395.1_ASM2395539v1_genomic	Bacillus vallismortis	PASS
GCF_026788905.1_ASM2678890v1_genomic	Bacillus vallismortis	PASS
GCF_026789005.1_ASM2678900v1_genomic	Bacillus vallismortis	PASS
GCF_026790935.1_ASM2679093v1_genomic	Bacillus vallismortis	PASS
GCF_026790945.1_ASM2679094v1_genomic	Bacillus vallismortis	PASS
GCF_026791425.1_ASM2679142v1_genomic	Bacillus vallismortis	PASS
GCF_026791995.1_ASM2679199v1_genomic	Bacillus vallismortis	PASS
GCF_026792035.1_ASM2679203v1_genomic	Bacillus vallismortis	PASS
GCF_026792345.1_ASM2679234v1_genomic	Bacillus vallismortis	PASS
GCF_000404285.1_ASM40428v1_genomic	Bacillus halotolerans	PASS
GCF_001517105.1_ASM151710v1_genomic	Bacillus halotolerans	PASS
GCF_001517115.1_ASM151711v1_genomic	Bacillus halotolerans	PASS
GCF_001517135.1_ASM151713v1_genomic	Bacillus halotolerans	PASS
GCF_001637525.1_ASM163752v1_genomic	Bacillus halotolerans	PASS
GCF_001729105.1_ASM172910v1_genomic	Bacillus halotolerans	PASS
GCF_002592025.1_ASM259202v1_genomic	Bacillus halotolerans	PASS
GCF_002860135.1_ASM286013v1_genomic	Bacillus halotolerans	PASS
GCF_002860175.1_ASM286017v1_genomic	Bacillus halotolerans	PASS
GCF_002914545.1_ASM291454v1_genomic	Bacillus halotolerans	PASS
GCF_002993735.1_ASM299373v1_genomic	Bacillus halotolerans	PASS
GCF_002993745.1_ASM299374v1_genomic	Bacillus halotolerans	PASS
GCF_002993765.1_ASM299376v1_genomic	Bacillus halotolerans	PASS
GCF_002998215.1_ASM299821v1_genomic	Bacillus halotolerans	PASS
GCF_002998275.1_ASM299827v1_genomic	Bacillus halotolerans	PASS
GCF_003003575.1_ASM300357v1_genomic	Bacillus halotolerans	PASS
GCF_004006435.1_ASM400643v1_genomic	Bacillus halotolerans	PASS
GCF_013347105.1_ASM1334710v1_genomic	Bacillus halotolerans	PASS
GCF_014621755.1_ASM1462175v1_genomic	Bacillus halotolerans	PASS
GCF_016093395.1_ASM1609339v1_genomic	Bacillus halotolerans	PASS
GCF_016461605.1_HUBH_1_genomic	Bacillus halotolerans	PASS
GCF_016767255.1_ASM1676725v1_genomic	Bacillus halotolerans	PASS
GCF_016767285.1_ASM1676728v1_genomic	Bacillus halotolerans	PASS
GCF_016767295.1_ASM1676729v1_genomic	Bacillus halotolerans	PASS
GCF_016767335.1_ASM1676733v1_genomic	Bacillus halotolerans	PASS
GCF_016773235.1_ASM1677323v1_genomic	Bacillus halotolerans	PASS
GCF_018417515.1_ASM1841751v1_genomic	Bacillus halotolerans	PASS
GCF_018729275.1_ASM1872927v1_genomic	Bacillus halotolerans	PASS
GCF_018916735.1_ASM1891673v1_genomic	Bacillus halotolerans	PASS
GCF_019149305.1_ASM1914930v1_genomic	Bacillus halotolerans	PASS
GCF_020682985.1_ASM2068298v1_genomic	Bacillus halotolerans	PASS
GCF_020685165.1_ASM2068516v1_genomic	Bacillus halotolerans	PASS
GCF_023713365.1_ASM2371336v1_genomic	Bacillus halotolerans	PASS
GCF_024266605.1_ASM2426660v1_genomic	Bacillus halotolerans	PASS
GCF_024266645.1_ASM2426664v1_genomic	Bacillus halotolerans	PASS
GCF_024320775.1_ASM2432077v1_genomic	Bacillus halotolerans	PASS
GCF_024510645.1_ASM2451064v1_genomic	Bacillus halotolerans	PASS
GCF_024706235.1_ASM2470623v1_genomic	Bacillus halotolerans	PASS
GCF_025809355.1_ASM2580935v1_genomic	Bacillus halotolerans	PASS
GCF_026013885.1_ASM2601388v1_genomic	Bacillus halotolerans	PASS
GCF_026791695.1_ASM2679169v1_genomic	Bacillus halotolerans	PASS
GCF_026794505.1_ASM2679450v1_genomic	Bacillus halotolerans	PASS
GCF_026795345.1_ASM2679534v1_genomic	Bacillus halotolerans	PASS
GCF_026795355.1_ASM2679535v1_genomic	Bacillus halotolerans	PASS
GCF_026967595.1_ASM2696759v1_genomic	Bacillus halotolerans	PASS
GCF_029526795.1_ASM2952679v1_genomic	Bacillus halotolerans	PASS
GCF_029588905.1_ASM2958890v1_genomic	Bacillus halotolerans	PASS
GCF_030123205.1_ASM3012320v1_genomic	Bacillus halotolerans	PASS
GCF_030167075.1_ASM3016707v1_genomic	Bacillus halotolerans	PASS
GCF_030292055.1_ASM3029205v1_genomic	Bacillus halotolerans	PASS
GCF_030299595.1_ASM3029959v1_genomic	Bacillus halotolerans	PASS
GCF_030718045.1_ASM3071804v1_genomic	Bacillus halotolerans	PASS
GCF_031001775.1_ASM3100177v1_genomic	Bacillus halotolerans	PASS
GCF_032654585.1_ASM3265458v1_genomic	Bacillus halotolerans	PASS
GCF_032763365.1_ASM3276336v1_genomic	Bacillus halotolerans	PASS
GCF_033568485.1_ASM3356848v1_genomic	Bacillus halotolerans	PASS
GCF_000245335.1_ASM24533v1_genomic	Bacillus mojavensis	PASS
GCF_000507105.1_KCTC_3706_01_genomic	Bacillus mojavensis	PASS
GCF_012648005.1_ASM1264800v1_genomic	Bacillus mojavensis	PASS
GCF_014499005.1_ASM1449900v1_genomic	Bacillus mojavensis	PASS
GCF_026789885.1_ASM2678988v1_genomic	Bacillus mojavensis	PASS
GCF_026791735.1_ASM2679173v1_genomic	Bacillus mojavensis	PASS
GCF_026791855.1_ASM2679185v1_genomic	Bacillus mojavensis	PASS
GCF_026795055.1_ASM2679505v1_genomic	Bacillus mojavensis	PASS
GCF_026795395.1_ASM2679539v1_genomic	Bacillus mojavensis	PASS
GCF_030291295.1_ASM3029129v1_genomic	Bacillus mojavensis	PASS
GCF_031316635.1_ASM3131663v1_genomic	Bacillus mojavensis	PASS
GCF_000342105.1_Draft_Genome_Sequence_of_Bacillus_sonorensis_L12_genomic	Bacillus sonorensis	PASS
GCF_000507125.1_KCTC_13918_01_genomic	Bacillus sonorensis	PASS
GCF_001592005.1_ASM159200v1_genomic	Bacillus sonorensis	PASS
GCF_002202015.1_ASM220201v1_genomic	Bacillus sonorensis	PASS
GCF_002271755.1_assembly-7710_v1_genomic	Bacillus sonorensis	PASS
GCF_003473165.1_ASM347316v1_genomic	Bacillus sonorensis	PASS
GCF_015845975.1_ASM1584597v1_genomic	Bacillus sonorensis	PASS
GCF_018332995.1_ASM1833299v1_genomic	Bacillus sonorensis	PASS
GCF_021728965.1_ASM2172896v1_genomic	Bacillus sonorensis	PASS
GCF_026788725.1_ASM2678872v1_genomic	Bacillus sonorensis	PASS
GCF_026789585.1_ASM2678958v1_genomic	Bacillus sonorensis	PASS
GCF_026789675.1_ASM2678967v1_genomic	Bacillus sonorensis	PASS
GCF_026789865.1_ASM2678986v1_genomic	Bacillus sonorensis	PASS
GCF_026790245.1_ASM2679024v1_genomic	Bacillus sonorensis	PASS
GCF_026791375.1_ASM2679137v1_genomic	Bacillus sonorensis	PASS
GCF_026792135.1_ASM2679213v1_genomic	Bacillus sonorensis	PASS
GCF_026792305.1_ASM2679230v1_genomic	Bacillus sonorensis	PASS
GCF_026799555.1_ASM2679955v1_genomic	Bacillus sonorensis	PASS
GCF_026799575.1_ASM2679957v1_genomic	Bacillus sonorensis	PASS
GCF_026799595.1_ASM2679959v1_genomic	Bacillus sonorensis	PASS
GCF_026799715.1_ASM2679971v1_genomic	Bacillus sonorensis	PASS
GCF_027688195.1_ASM2768819v1_genomic	Bacillus sonorensis	PASS
GCF_031324045.1_ASM3132404v1_genomic	Bacillus sonorensis	PASS
GCF_034055115.1_ASM3405511v1_genomic	Bacillus sonorensis	PASS
GCF_900166645.1_PRJEB19417_genomic	Bacillus sonorensis	PASS
GCF_902364585.1_MGYG-HGUT-00227_genomic	Bacillus sonorensis	PASS
GCF_000009045.1_ASM904v1_genomic	Bacillus subtilis	PASS
GCF_000155325.1_ASM15532v1_genomic	Bacillus subtilis	PASS
GCF_000155355.1_ASM15535v1_genomic	Bacillus subtilis	PASS
GCF_000155375.1_ASM15537v1_genomic	Bacillus subtilis	PASS
GCF_000183765.1_ASM18376v2_genomic	Bacillus subtilis	PASS
GCF_000186085.1_ASM18608v1_genomic	Bacillus subtilis	PASS
GCF_000186745.1_ASM18674v1_genomic	Bacillus subtilis	PASS
GCF_000209795.2_ASM20979v2_genomic	Bacillus subtilis	PASS
GCF_000227485.1_ASM22748v1_genomic	Bacillus subtilis	PASS
GCF_000230755.1_ASM23075v2_genomic	Bacillus subtilis	PASS
GCF_000245295.1_ASM24529v1_genomic	Bacillus subtilis	PASS
GCF_000293765.1_ASM29376v1_genomic	Bacillus subtilis	PASS
GCF_000321395.1_ASM32139v1_genomic	Bacillus subtilis	PASS
GCF_000338735.1_ASM33873v1_genomic	Bacillus subtilis	PASS
GCF_000340295.1_ASM34029v1_genomic	Bacillus subtilis	PASS
GCF_000341775.1_ASM34177v1_genomic	Bacillus subtilis	PASS
GCF_000344745.1_ASM34474v1_genomic	Bacillus subtilis	PASS
GCF_000349795.1_ASM34979v1_genomic	Bacillus subtilis	PASS
GCF_000409585.1_Hal1_genomic	Bacillus subtilis	PASS
GCF_000497345.1_MP9_genomic	Bacillus subtilis	PASS
GCF_000497365.1_MP11_genomic	Bacillus subtilis	PASS
GCF_000497485.1_ASM49748v1_genomic	Bacillus subtilis	PASS
GCF_000507005.1_PTS394_genomic	Bacillus subtilis	PASS
GCF_000523045.1_ASM52304v1_genomic	Bacillus subtilis	PASS
GCF_000582885.1_QH-1_V1.0_genomic	Bacillus subtilis	PASS
GCF_000691185.1_ASM69118v1_genomic	Bacillus subtilis	PASS
GCF_000696615.1_ASM69661v1_genomic	Bacillus subtilis	PASS
GCF_000696635.1_ASM69663v1_genomic	Bacillus subtilis	PASS
GCF_000699465.1_ASM69946v1_genomic	Bacillus subtilis	PASS
GCF_000699525.1_ASM69952v1_genomic	Bacillus subtilis	PASS
GCF_000706705.1_ASM70670v1_genomic	Bacillus subtilis	PASS
GCF_000724125.1_BSUBE1_genomic	Bacillus subtilis	PASS
GCF_000735115.1_ASM73511v1_genomic	Bacillus subtilis	PASS
GCF_000737405.1_ASM73740v1_genomic	Bacillus subtilis	PASS
GCF_000740475.1_ASM74047v1_genomic	Bacillus subtilis	PASS
GCF_000740485.1_ASM74048v1_genomic	Bacillus subtilis	PASS
GCF_000747645.1_ASM74764v1_genomic	Bacillus subtilis	PASS
GCF_000769515.1_ASM76951v1_genomic	Bacillus subtilis	GTDB_FAIL
GCF_000772125.1_ASM77212v1_genomic	Bacillus subtilis	GTDB_FAIL
GCF_000772165.1_ASM77216v1_genomic	Bacillus subtilis	GTDB_FAIL
GCF_000772205.1_ASM77220v1_genomic	Bacillus subtilis	GTDB_FAIL
GCF_000782835.1_ASM78283v1_genomic	Bacillus subtilis	PASS
GCF_000789275.1_ASM78927v1_genomic	Bacillus subtilis	PASS
GCF_000789295.1_ASM78929v1_genomic	Bacillus subtilis	PASS
GCF_000827065.1_ASM82706v1_genomic	Bacillus subtilis	PASS
GCF_000828495.1_ASM82849v1_genomic	Bacillus subtilis	PASS
GCF_000830595.1_ASM83059v1_genomic	Bacillus subtilis	PASS
GCF_000830605.1_ASM83060v1_genomic	Bacillus subtilis	PASS
GCF_000830635.1_ASM83063v1_genomic	Bacillus subtilis	PASS
GCF_000830645.1_ASM83064v1_genomic	Bacillus subtilis	PASS
GCF_000830675.1_ASM83067v1_genomic	Bacillus subtilis	PASS
GCF_000830695.1_ASM83069v1_genomic	Bacillus subtilis	PASS
GCF_000830715.1_ASM83071v1_genomic	Bacillus subtilis	PASS
GCF_000830735.1_ASM83073v1_genomic	Bacillus subtilis	PASS
GCF_000832195.1_ASM83219v1_genomic	Bacillus subtilis	PASS
GCF_000878265.1_ASM87826v1_genomic	Bacillus subtilis	PASS
GCF_000934165.1_ASM93416v1_genomic	Bacillus subtilis	PASS
GCF_000952875.1_ASM95287v1_genomic	Bacillus subtilis	GTDB_FAIL
GCF_000952895.1_BS34ACh_genomic	Bacillus subtilis	PASS
GCF_000953615.1_BS49Ch_genomic	Bacillus subtilis	PASS
GCF_000971925.1_ASM97192v1_genomic	Bacillus subtilis	PASS
GCF_000973605.1_ASM97360v1_genomic	Bacillus subtilis	PASS
GCF_000982455.1_ASM98245v1_genomic	Bacillus subtilis	PASS
GCF_001015095.1_ASM101509v1_genomic	Bacillus subtilis	PASS
GCF_001037985.1_ASM103798v1_genomic	Bacillus subtilis	PASS
GCF_001043765.1_ASM104376v1_genomic	Bacillus subtilis	PASS
GCF_001057075.1_ASM105707v1_genomic	Bacillus subtilis	PASS
GCF_001187765.1_BSMS1577_genomic	Bacillus subtilis	PASS
GCF_001278955.1_ASM127895v1_genomic	Bacillus subtilis	PASS
GCF_001286745.1_Bacillus_JRS9_genomic	Bacillus subtilis	PASS
GCF_001286765.1_Bacillus_JRS7_genomic	Bacillus subtilis	PASS
GCF_001286785.1_Bacillus_JRS10_genomic	Bacillus subtilis	GTDB_FAIL
GCF_001286845.1_Bacillus_JRS2_genomic	Bacillus subtilis	PASS
GCF_001286865.1_Bacillus_JRS6_genomic	Bacillus subtilis	PASS
GCF_001286885.1_Bacillus_JRS11_genomic	Bacillus subtilis	PASS
GCF_001342275.1_6755_6_9_genomic	Bacillus subtilis	PASS
GCF_001465815.1_ASM146581v1_genomic	Bacillus subtilis	PASS
GCF_001541905.1_ASM154190v1_genomic	Bacillus subtilis	PASS
GCF_001565875.1_ASM156587v1_genomic	Bacillus subtilis	PASS
GCF_001596535.1_ASM159653v1_genomic	Bacillus subtilis	PASS
GCF_001597265.1_ASM159726v1_genomic	Bacillus subtilis	GTDB_FAIL
GCF_001604995.1_ASM160499v1_genomic	Bacillus subtilis	PASS
GCF_001619535.1_ASM161953v1_genomic	Bacillus subtilis	PASS
GCF_001625135.1_ASM162513v1_genomic	Bacillus subtilis	PASS
GCF_001641145.1_ASM164114v1_genomic	Bacillus subtilis	PASS
GCF_001660525.1_ASM166052v1_genomic	Bacillus subtilis	PASS
GCF_001660605.1_ASM166060v1_genomic	Bacillus subtilis	PASS
GCF_001661555.1_ASM166155v1_genomic	Bacillus subtilis	PASS
GCF_001662955.1_ASM166295v1_genomic	Bacillus subtilis	PASS
GCF_001663575.1_ASM166357v1_genomic	Bacillus subtilis	GTDB_FAIL
GCF_001697265.1_ASM169726v1_genomic	Bacillus subtilis	PASS
GCF_001703495.1_ASM170349v1_genomic	Bacillus subtilis	PASS
GCF_001704095.1_ASM170409v1_genomic	Bacillus subtilis	PASS
GCF_001717105.1_ASM171710v1_genomic	Bacillus subtilis	PASS
GCF_001720505.1_ASM172050v1_genomic	Bacillus subtilis	PASS
GCF_001726025.1_ASM172602v1_genomic	Bacillus subtilis	PASS
GCF_001742355.1_ASM174235v1_genomic	Bacillus subtilis	PASS
GCF_001742365.1_ASM174236v1_genomic	Bacillus subtilis	PASS
GCF_001746575.1_ASM174657v1_genomic	Bacillus subtilis	PASS
GCF_001747445.1_ASM174744v1_genomic	Bacillus subtilis	PASS
GCF_001750745.1_ASM175074v1_genomic	Bacillus subtilis	PASS
GCF_001808235.1_ASM180823v1_genomic	Bacillus subtilis	PASS
GCF_001876485.1_ASM187648v1_genomic	Bacillus subtilis	PASS
GCF_001876515.1_ASM187651v1_genomic	Bacillus subtilis	PASS
GCF_001876645.1_ASM187664v1_genomic	Bacillus subtilis	PASS
GCF_001888825.1_ASM188882v1_genomic	Bacillus subtilis	PASS
GCF_001889385.1_ASM188938v1_genomic	Bacillus subtilis	GTDB_FAIL
GCF_001889625.1_ASM188962v1_genomic	Bacillus subtilis	PASS
GCF_001890405.1_ASM189040v1_genomic	Bacillus subtilis	PASS
GCF_001895065.1_ASM189506v1_genomic	Bacillus subtilis	PASS
GCF_001902555.1_ASM190255v1_genomic	Bacillus subtilis	PASS
GCF_001996305.1_ASM199630v1_genomic	Bacillus subtilis	PASS
GCF_002009095.1_ASM200909v1_genomic	Bacillus subtilis	PASS
GCF_002009135.1_ASM200913v1_genomic	Bacillus subtilis	PASS
GCF_002055965.1_ASM205596v1_genomic	Bacillus subtilis	PASS
GCF_002072735.1_ASM207273v1_genomic	Bacillus subtilis	PASS
GCF_002093785.1_ASM209378v1_genomic	Bacillus subtilis	PASS
GCF_002096095.1_ASM209609v1_genomic	Bacillus subtilis	PASS
GCF_002142515.1_ASM214251v1_genomic	Bacillus subtilis	PASS
GCF_002142535.1_ASM214253v1_genomic	Bacillus subtilis	PASS
GCF_002142595.1_ASM214259v1_genomic	Bacillus subtilis	PASS
GCF_002153395.1_ASM215339v1_genomic	Bacillus subtilis	PASS
GCF_002163815.1_ASM216381v1_genomic	Bacillus subtilis	PASS
GCF_002173615.1_ASM217361v1_genomic	Bacillus subtilis	PASS
GCF_002173695.1_ASM217369v1_genomic	Bacillus subtilis	PASS
GCF_002173715.1_ASM217371v1_genomic	Bacillus subtilis	PASS
GCF_002201955.1_ASM220195v1_genomic	Bacillus subtilis	PASS
GCF_002201995.1_ASM220199v1_genomic	Bacillus subtilis	PASS
GCF_002202035.1_ASM220203v1_genomic	Bacillus subtilis	PASS
GCF_002202055.1_ASM220205v1_genomic	Bacillus subtilis	PASS
GCF_002205435.1_ASM220543v1_genomic	Bacillus subtilis	PASS
GCF_002216085.1_ASM221608v1_genomic	Bacillus subtilis	PASS
GCF_002220075.1_ASM222007v1_genomic	Bacillus subtilis	PASS
GCF_002269175.1_ASM226917v1_genomic	Bacillus subtilis	PASS
GCF_002269195.1_ASM226919v1_genomic	Bacillus subtilis	PASS
GCF_002271425.1_assembly-7772_v1_genomic	Bacillus subtilis	PASS
GCF_002272375.1_assembly-7706_v1_genomic	Bacillus subtilis	PASS
GCF_002272405.1_assembly-7702_v1_genomic	Bacillus subtilis	PASS
GCF_002277775.1_ASM227777v1_genomic	Bacillus subtilis	PASS
GCF_002290305.1_ASM229030v1_genomic	Bacillus subtilis	PASS
GCF_002612765.1_ASM261276v1_genomic	Bacillus subtilis	PASS
GCF_002835225.1_ASM283522v1_genomic	Bacillus subtilis	PASS
GCF_002865705.1_ASM286570v1_genomic	Bacillus subtilis	PASS
GCF_002865715.1_ASM286571v1_genomic	Bacillus subtilis	PASS
GCF_002893805.1_ASM289380v1_genomic	Bacillus subtilis	PASS
GCF_002906075.1_ASM290607v1_genomic	Bacillus subtilis	PASS
GCF_002915255.1_ASM291525v1_genomic	Bacillus subtilis	GTDB_FAIL
GCF_002925885.1_ASM292588v1_genomic	Bacillus subtilis	PASS
GCF_002982175.1_ASM298217v1_genomic	Bacillus subtilis	PASS
GCF_002998755.1_ASM299875v1_genomic	Bacillus subtilis	PASS
GCF_002998795.1_ASM299879v1_genomic	Bacillus subtilis	PASS
GCF_003011815.1_ASM301181v1_genomic	Bacillus subtilis	PASS
GCF_003014945.1_ASM301494v1_genomic	Bacillus subtilis	PASS
GCF_003052465.1_ASM305246v1_genomic	Bacillus subtilis	PASS
GCF_003144575.1_ASM314457v1_genomic	Bacillus subtilis	PASS
GCF_003148355.1_ASM314835v2_genomic	Bacillus subtilis	PASS
GCF_003174785.1_ASM317478v1_genomic	Bacillus subtilis	PASS
GCF_003184225.1_ASM318422v1_genomic	Bacillus subtilis	PASS
GCF_003265285.1_ASM326528v1_genomic	Bacillus subtilis	PASS
GCF_003265645.1_ASM326564v1_genomic	Bacillus subtilis	PASS
GCF_003265725.1_ASM326572v1_genomic	Bacillus subtilis	PASS
GCF_003327665.1_ASM332766v1_genomic	Bacillus subtilis	PASS
GCF_003336815.1_ASM333681v1_genomic	Bacillus subtilis	PASS
GCF_003336895.2_ASM333689v2_genomic	Bacillus subtilis	PASS
GCF_003339745.1_ASM333974v1_genomic	Bacillus subtilis	PASS
GCF_003399995.1_ASM339999v1_genomic	Bacillus subtilis	PASS
GCF_003417435.1_ASM341743v1_genomic	Bacillus subtilis	PASS
GCF_003426125.1_ASM342612v1_genomic	Bacillus subtilis	PASS
GCF_003515125.1_ASM351512v1_genomic	Bacillus subtilis	PASS
GCF_003594755.2_ASM359475v2_genomic	Bacillus subtilis	PASS
GCF_003600775.1_ASM360077v1_genomic	Bacillus subtilis	GTDB_FAIL
GCF_003600785.1_ASM360078v1_genomic	Bacillus subtilis	PASS
GCF_003610955.1_ASM361095v1_genomic	Bacillus subtilis	PASS
GCF_003612735.1_ASM361273v1_genomic	Bacillus subtilis	PASS
GCF_003665195.1_ASM366519v1_genomic	Bacillus subtilis	PASS
GCF_003665215.1_ASM366521v1_genomic	Bacillus subtilis	PASS
GCF_003665235.1_ASM366523v1_genomic	Bacillus subtilis	PASS
GCF_003665255.1_ASM366525v1_genomic	Bacillus subtilis	PASS
GCF_003665275.1_ASM366527v1_genomic	Bacillus subtilis	PASS
GCF_003665295.1_ASM366529v1_genomic	Bacillus subtilis	PASS
GCF_003665315.1_ASM366531v1_genomic	Bacillus subtilis	PASS
GCF_003665335.1_ASM366533v1_genomic	Bacillus subtilis	PASS
GCF_003665355.1_ASM366535v1_genomic	Bacillus subtilis	PASS
GCF_003665395.1_ASM366539v1_genomic	Bacillus subtilis	PASS
GCF_003694695.1_ASM369469v1_genomic	Bacillus subtilis	PASS
GCF_003710285.1_ASM371028v1_genomic	Bacillus subtilis	PASS
GCF_003762825.1_ASM376282v1_genomic	Bacillus subtilis	PASS
GCF_003833195.1_ASM383319v1_genomic	Bacillus subtilis	GTDB_FAIL
GCF_003833205.1_ASM383320v1_genomic	Bacillus subtilis	PASS
GCF_003833235.1_ASM383323v1_genomic	Bacillus subtilis	PASS
GCF_003833255.1_ASM383325v1_genomic	Bacillus subtilis	GTDB_FAIL
GCF_003833295.1_ASM383329v1_genomic	Bacillus subtilis	PASS
GCF_003931545.1_ASM393154v1_genomic	Bacillus subtilis	PASS
GCF_003990435.1_ASM399043v1_genomic	Bacillus subtilis	PASS
GCF_004101345.1_ASM410134v1_genomic	Bacillus subtilis	PASS
GCF_004101365.1_ASM410136v1_genomic	Bacillus subtilis	PASS
GCF_004101405.1_ASM410140v1_genomic	Bacillus subtilis	PASS
GCF_004101425.1_ASM410142v1_genomic	Bacillus subtilis	PASS
GCF_004101445.1_ASM410144v1_genomic	Bacillus subtilis	PASS
GCF_004101465.1_ASM410146v1_genomic	Bacillus subtilis	PASS
GCF_004101485.1_ASM410148v1_genomic	Bacillus subtilis	PASS
GCF_004101565.1_ASM410156v1_genomic	Bacillus subtilis	PASS
GCF_004101945.1_ASM410194v1_genomic	Bacillus subtilis	PASS
GCF_004103535.1_ASM410353v1_genomic	Bacillus subtilis	PASS
GCF_004103555.1_ASM410355v1_genomic	Bacillus subtilis	PASS
GCF_004103595.1_ASM410359v1_genomic	Bacillus subtilis	PASS
GCF_004103895.1_ASM410389v1_genomic	Bacillus subtilis	PASS
GCF_004119175.1_ASM411917v1_genomic	Bacillus subtilis	PASS
GCF_004119535.1_ASM411953v1_genomic	Bacillus subtilis	PASS
GCF_004119555.1_ASM411955v1_genomic	Bacillus subtilis	PASS
GCF_004119595.1_ASM411959v1_genomic	Bacillus subtilis	PASS
GCF_004119615.1_ASM411961v1_genomic	Bacillus subtilis	PASS
GCF_004119635.1_ASM411963v1_genomic	Bacillus subtilis	PASS
GCF_004119655.1_ASM411965v1_genomic	Bacillus subtilis	PASS
GCF_004119675.1_ASM411967v1_genomic	Bacillus subtilis	PASS
GCF_004119695.1_ASM411969v1_genomic	Bacillus subtilis	PASS
GCF_004119715.1_ASM411971v1_genomic	Bacillus subtilis	PASS
GCF_004119775.1_ASM411977v1_genomic	Bacillus subtilis	PASS
GCF_004119815.1_ASM411981v1_genomic	Bacillus subtilis	PASS
GCF_004119835.1_ASM411983v1_genomic	Bacillus subtilis	PASS
GCF_004119875.1_ASM411987v1_genomic	Bacillus subtilis	PASS
GCF_004294535.1_ASM429453v1_genomic	Bacillus subtilis	PASS
GCF_004294565.1_ASM429456v1_genomic	Bacillus subtilis	PASS
GCF_004323065.1_ASM432306v1_genomic	Bacillus subtilis	PASS
GCF_004328925.1_ASM432892v1_genomic	Bacillus subtilis	PASS
GCF_004361725.1_ASM436172v1_genomic	Bacillus subtilis	PASS
GCF_004365735.1_ASM436573v1_genomic	Bacillus subtilis	PASS
GCF_004366695.1_ASM436669v1_genomic	Bacillus subtilis	PASS
GCF_004923335.1_ASM492333v1_genomic	Bacillus subtilis	PASS
GCF_005153965.1_ASM515396v1_genomic	Bacillus subtilis	PASS
GCF_005160425.1_ASM516042v1_genomic	Bacillus subtilis	PASS
GCF_005218185.1_ASM521818v1_genomic	Bacillus subtilis	PASS
GCF_005234095.1_ASM523409v1_genomic	Bacillus subtilis	PASS
GCF_005849145.1_ASM584914v1_genomic	Bacillus subtilis	PASS
GCF_006088795.1_ASM608879v1_genomic	Bacillus subtilis	PASS
GCF_006165085.1_ASM616508v1_genomic	Bacillus subtilis	PASS
GCF_006364495.1_ASM636449v1_genomic	Bacillus subtilis	PASS
GCF_006454465.1_ASM645446v1_genomic	Bacillus subtilis	PASS
GCF_006741845.1_ASM674184v1_genomic	Bacillus subtilis	PASS
GCF_007665695.1_ASM766569v1_genomic	Bacillus subtilis	PASS
GCF_007666235.1_ASM766623v1_genomic	Bacillus subtilis	PASS
GCF_007666295.1_ASM766629v1_genomic	Bacillus subtilis	PASS
GCF_007666315.1_ASM766631v1_genomic	Bacillus subtilis	PASS
GCF_007666735.1_ASM766673v1_genomic	Bacillus subtilis	PASS
GCF_007666785.1_ASM766678v1_genomic	Bacillus subtilis	PASS
GCF_007666795.1_ASM766679v1_genomic	Bacillus subtilis	PASS
GCF_007666815.1_ASM766681v1_genomic	Bacillus subtilis	PASS
GCF_007667365.1_ASM766736v1_genomic	Bacillus subtilis	PASS
GCF_007667515.1_ASM766751v1_genomic	Bacillus subtilis	PASS
GCF_007672955.1_ASM767295v1_genomic	Bacillus subtilis	PASS
GCF_007673065.1_ASM767306v1_genomic	Bacillus subtilis	PASS
GCF_007677395.1_ASM767739v1_genomic	Bacillus subtilis	PASS
GCF_007677755.1_ASM767775v1_genomic	Bacillus subtilis	PASS
GCF_007678335.1_ASM767833v1_genomic	Bacillus subtilis	PASS
GCF_007679005.1_ASM767900v1_genomic	Bacillus subtilis	PASS
GCF_007679335.1_ASM767933v1_genomic	Bacillus subtilis	PASS
GCF_007786555.1_ASM778655v1_genomic	Bacillus subtilis	PASS
GCF_007829355.1_ASM782935v1_genomic	Bacillus subtilis	PASS
GCF_007829445.1_ASM782944v1_genomic	Bacillus subtilis	PASS
GCF_007829495.1_ASM782949v1_genomic	Bacillus subtilis	PASS
GCF_007829515.1_ASM782951v1_genomic	Bacillus subtilis	PASS
GCF_007829655.1_ASM782965v1_genomic	Bacillus subtilis	PASS
GCF_007829735.1_ASM782973v1_genomic	Bacillus subtilis	PASS
GCF_007845115.1_ASM784511v1_genomic	Bacillus subtilis	PASS
GCF_007995205.1_ASM799520v1_genomic	Bacillus subtilis	PASS
GCF_008014635.1_ASM801463v1_genomic	Bacillus subtilis	PASS
GCF_008017615.1_ASM801761v1_genomic	Bacillus subtilis	PASS
GCF_008131765.1_ASM813176v1_genomic	Bacillus subtilis	PASS
GCF_008180345.1_ASM818034v1_genomic	Bacillus subtilis	PASS
GCF_008180625.1_ASM818062v1_genomic	Bacillus subtilis	PASS
GCF_008682315.1_ASM868231v1_genomic	Bacillus subtilis	PASS
GCF_008764245.1_FS357_genomic	Bacillus subtilis	GTDB_FAIL
GCF_008831405.1_ASM883140v1_genomic	Bacillus subtilis	PASS
GCF_009017455.1_ASM901745v1_genomic	Bacillus subtilis	PASS
GCF_009363835.1_ASM936383v1_genomic	Bacillus subtilis	PASS
GCF_009497795.1_ASM949779v1_genomic	Bacillus subtilis	PASS
GCF_009497815.1_ASM949781v1_genomic	Bacillus subtilis	PASS
GCF_009662155.1_ASM966215v1_genomic	Bacillus subtilis	PASS
GCF_009662175.1_ASM966217v1_genomic	Bacillus subtilis	PASS
GCF_009662195.1_ASM966219v1_genomic	Bacillus subtilis	PASS
GCF_009662215.1_ASM966221v1_genomic	Bacillus subtilis	PASS
GCF_009662235.1_ASM966223v1_genomic	Bacillus subtilis	PASS
GCF_009662255.1_ASM966225v1_genomic	Bacillus subtilis	PASS
GCF_009662275.1_ASM966227v1_genomic	Bacillus subtilis	PASS
GCF_009662335.1_ASM966233v1_genomic	Bacillus subtilis	PASS
GCF_009662355.1_ASM966235v1_genomic	Bacillus subtilis	PASS
GCF_009662375.1_ASM966237v1_genomic	Bacillus subtilis	PASS
GCF_009662415.1_ASM966241v1_genomic	Bacillus subtilis	PASS
GCF_009662435.1_ASM966243v1_genomic	Bacillus subtilis	PASS
GCF_009662455.1_ASM966245v1_genomic	Bacillus subtilis	PASS
GCF_009665145.1_ASM966514v2_genomic	Bacillus subtilis	PASS
GCF_009676665.1_ASM967666v1_genomic	Bacillus subtilis	PASS
GCF_009741365.1_ASM974136v1_genomic	Bacillus subtilis	PASS
GCF_009834865.1_ASM983486v1_genomic	Bacillus subtilis	PASS
GCF_009857115.1_ASM985711v1_genomic	Bacillus subtilis	PASS
GCF_009866865.1_ASM986686v1_genomic	Bacillus subtilis	PASS
GCF_009884005.1_ASM988400v1_genomic	Bacillus subtilis	PASS
GCF_009913255.1_ASM991325v1_genomic	Bacillus subtilis	PASS
GCF_009913275.1_ASM991327v1_genomic	Bacillus subtilis	PASS
GCF_009913395.1_ASM991339v1_genomic	Bacillus subtilis	PASS
GCF_009913515.1_ASM991351v1_genomic	Bacillus subtilis	PASS
GCF_009913535.1_ASM991353v1_genomic	Bacillus subtilis	PASS
GCF_009913555.1_ASM991355v1_genomic	Bacillus subtilis	PASS
GCF_009913575.1_ASM991357v1_genomic	Bacillus subtilis	PASS
GCF_009913595.1_ASM991359v1_genomic	Bacillus subtilis	PASS
GCF_009914155.1_ASM991415v1_genomic	Bacillus subtilis	PASS
GCF_009982935.1_ASM998293v1_genomic	Bacillus subtilis	PASS
GCF_009996815.1_ASM999681v1_genomic	Bacillus subtilis	PASS
GCF_010094155.1_ASM1009415v1_genomic	Bacillus subtilis	PASS
GCF_010578025.1_ASM1057802v1_genomic	Bacillus subtilis	PASS
GCF_010578035.1_ASM1057803v1_genomic	Bacillus subtilis	PASS
GCF_010578065.1_ASM1057806v1_genomic	Bacillus subtilis	PASS
GCF_010578135.1_ASM1057813v1_genomic	Bacillus subtilis	PASS
GCF_010578165.1_ASM1057816v1_genomic	Bacillus subtilis	PASS
GCF_010578225.1_ASM1057822v1_genomic	Bacillus subtilis	PASS
GCF_010578235.1_ASM1057823v1_genomic	Bacillus subtilis	PASS
GCF_010580645.1_ASM1058064v1_genomic	Bacillus subtilis	PASS
GCF_010614705.1_ASM1061470v1_genomic	Bacillus subtilis	PASS
GCF_010614715.1_ASM1061471v1_genomic	Bacillus subtilis	PASS
GCF_010614785.1_ASM1061478v1_genomic	Bacillus subtilis	PASS
GCF_010634645.1_ASM1063464v1_genomic	Bacillus subtilis	PASS
GCF_010912695.1_ASM1091269v1_genomic	Bacillus subtilis	PASS
GCF_011317145.1_ASM1131714v1_genomic	Bacillus subtilis	PASS
GCF_011456075.1_ASM1145607v1_genomic	Bacillus subtilis	PASS
GCF_011765645.1_ASM1176564v1_genomic	Bacillus subtilis	PASS
GCF_011800745.1_ASM1180074v1_genomic	Bacillus subtilis	PASS
GCF_012028945.1_ASM1202894v1_genomic	Bacillus subtilis	PASS
GCF_012029855.1_ASM1202985v1_genomic	Bacillus subtilis	PASS
GCF_012030395.1_ASM1203039v1_genomic	Bacillus subtilis	PASS
GCF_012030675.1_ASM1203067v1_genomic	Bacillus subtilis	PASS
GCF_012647565.1_ASM1264756v1_genomic	Bacillus subtilis	PASS
GCF_012648205.1_ASM1264820v1_genomic	Bacillus subtilis	PASS
GCF_012648345.1_ASM1264834v1_genomic	Bacillus subtilis	PASS
GCF_012689465.1_ASM1268946v1_genomic	Bacillus subtilis	PASS
GCF_012689485.1_ASM1268948v1_genomic	Bacillus subtilis	PASS
GCF_012926045.1_ASM1292604v1_genomic	Bacillus subtilis	PASS
GCF_012931705.2_ASM1293170v2_genomic	Bacillus subtilis	PASS
GCF_012935335.1_ASM1293533v1_genomic	Bacillus subtilis	PASS
GCF_013009385.1_ASM1300938v1_genomic	Bacillus subtilis	PASS
GCF_013186645.1_ASM1318664v1_genomic	Bacillus subtilis	PASS
GCF_013266935.1_ASM1326693v1_genomic	Bacillus subtilis	PASS
GCF_013267025.1_ASM1326702v1_genomic	Bacillus subtilis	PASS
GCF_013267035.1_ASM1326703v1_genomic	Bacillus subtilis	PASS
GCF_013267115.1_ASM1326711v1_genomic	Bacillus subtilis	PASS
GCF_013285325.1_ASM1328532v1_genomic	Bacillus subtilis	PASS
GCF_013332455.1_ASM1333245v1_genomic	Bacillus subtilis	PASS
GCF_013342875.1_ASM1334287v1_genomic	Bacillus subtilis	PASS
GCF_013388335.1_ASM1338833v1_genomic	Bacillus subtilis	PASS
GCF_013393725.1_ASM1339372v1_genomic	Bacillus subtilis	PASS
GCF_013620675.1_ASM1362067v1_genomic	Bacillus subtilis	PASS
GCF_013620725.1_ASM1362072v1_genomic	Bacillus subtilis	PASS
GCF_013867545.1_ASM1386754v1_genomic	Bacillus subtilis	PASS
GCF_014046405.1_ASM1404640v1_genomic	Bacillus subtilis	PASS
GCF_014171535.1_ASM1417153v1_genomic	Bacillus subtilis	PASS
GCF_014219005.1_ASM1421900v1_genomic	Bacillus subtilis	PASS
GCF_014298115.1_ASM1429811v1_genomic	Bacillus subtilis	PASS
GCF_014389245.2_ASM1438924v2_genomic	Bacillus subtilis	PASS
GCF_014489275.1_ASM1448927v1_genomic	Bacillus subtilis	PASS
GCF_014498985.1_ASM1449898v1_genomic	Bacillus subtilis	PASS
GCF_014498995.1_ASM1449899v1_genomic	Bacillus subtilis	PASS
GCF_014805495.1_ASM1480549v1_genomic	Bacillus subtilis	PASS
GCF_014856585.1_ASM1485658v1_genomic	Bacillus subtilis	PASS
GCF_014878105.1_ASM1487810v1_genomic	Bacillus subtilis	PASS
GCF_014879275.1_ASM1487927v1_genomic	Bacillus subtilis	PASS
GCF_014961985.1_ASM1496198v1_genomic	Bacillus subtilis	PASS
GCF_015070965.1_ASM1507096v1_genomic	Bacillus subtilis	PASS
GCF_015070995.1_ASM1507099v1_genomic	Bacillus subtilis	PASS
GCF_015535655.1_ASM1553565v1_genomic	Bacillus subtilis	PASS
GCF_015602625.1_ASM1560262v1_genomic	Bacillus subtilis	PASS
GCF_015645605.1_ASM1564560v1_genomic	Bacillus subtilis	PASS
GCF_015645615.1_ASM1564561v1_genomic	Bacillus subtilis	PASS
GCF_015645655.1_ASM1564565v1_genomic	Bacillus subtilis	PASS
GCF_015645665.1_ASM1564566v1_genomic	Bacillus subtilis	PASS
GCF_015645705.1_ASM1564570v1_genomic	Bacillus subtilis	PASS
GCF_015645725.1_ASM1564572v1_genomic	Bacillus subtilis	PASS
GCF_015654205.1_ASM1565420v1_genomic	Bacillus subtilis	PASS
GCF_015776795.1_ASM1577679v1_genomic	Bacillus subtilis	PASS
GCF_015844635.1_ASM1584463v1_genomic	Bacillus subtilis	PASS
GCF_015844655.1_ASM1584465v1_genomic	Bacillus subtilis	PASS
GCF_015845175.1_ASM1584517v1_genomic	Bacillus subtilis	PASS
GCF_015880865.1_ASM1588086v1_genomic	Bacillus subtilis	PASS
GCF_015881035.1_ASM1588103v1_genomic	Bacillus subtilis	PASS
GCF_016065415.1_ASM1606541v1_genomic	Bacillus subtilis	PASS
GCF_016411905.1_ASM1641190v1_genomic	Bacillus subtilis	PASS
GCF_016411915.1_ASM1641191v1_genomic	Bacillus subtilis	PASS
GCF_016774345.1_ASM1677434v1_genomic	Bacillus subtilis	PASS
GCF_016894165.1_ASM1689416v1_genomic	Bacillus subtilis	PASS
GCF_017352355.1_ASM1735235v1_genomic	Bacillus subtilis	PASS
GCF_017592405.1_ASM1759240v1_genomic	Bacillus subtilis	PASS
GCF_017599395.1_ASM1759939v1_genomic	Bacillus subtilis	PASS
GCF_017601115.1_ASM1760111v1_genomic	Bacillus subtilis	PASS
GCF_017753785.1_ASM1775378v1_genomic	Bacillus subtilis	PASS
GCF_017817855.1_ASM1781785v1_genomic	Bacillus subtilis	PASS
GCF_017901775.1_ASM1790177v1_genomic	Bacillus subtilis	PASS
GCF_018122435.1_ASM1812243v1_genomic	Bacillus subtilis	PASS
GCF_018122445.1_ASM1812244v1_genomic	Bacillus subtilis	PASS
GCF_018122455.1_ASM1812245v1_genomic	Bacillus subtilis	PASS
GCF_018122465.1_ASM1812246v1_genomic	Bacillus subtilis	PASS
GCF_018122475.1_ASM1812247v1_genomic	Bacillus subtilis	PASS
GCF_018122535.1_ASM1812253v1_genomic	Bacillus subtilis	PASS
GCF_018141065.1_ASM1814106v1_genomic	Bacillus subtilis	PASS
GCF_018223525.1_ASM1822352v1_genomic	Bacillus subtilis	PASS
GCF_018224865.2_ASM1822486v2_genomic	Bacillus subtilis	PASS
GCF_018394175.1_ASM1839417v1_genomic	Bacillus subtilis	PASS
GCF_018454405.1_ASM1845440v1_genomic	Bacillus subtilis	PASS
GCF_018530835.1_ASM1853083v1_genomic	Bacillus subtilis	PASS
GCF_018603605.1_ASM1860360v1_genomic	Bacillus subtilis	PASS
GCF_018603715.1_ASM1860371v1_genomic	Bacillus subtilis	PASS
GCF_018603725.1_ASM1860372v1_genomic	Bacillus subtilis	PASS
GCF_018603805.1_ASM1860380v1_genomic	Bacillus subtilis	PASS
GCF_018884165.1_ASM1888416v1_genomic	Bacillus subtilis	PASS
GCF_018986855.1_ASM1898685v1_genomic	Bacillus subtilis	PASS
GCF_019037205.1_ASM1903720v1_genomic	Bacillus subtilis	PASS
GCF_019037305.1_ASM1903730v1_genomic	Bacillus subtilis	PASS
GCF_019037315.1_ASM1903731v1_genomic	Bacillus subtilis	PASS
GCF_019037405.1_ASM1903740v1_genomic	Bacillus subtilis	PASS
GCF_019037525.1_ASM1903752v1_genomic	Bacillus subtilis	PASS
GCF_019037645.1_ASM1903764v1_genomic	Bacillus subtilis	PASS
GCF_019037825.1_ASM1903782v1_genomic	Bacillus subtilis	PASS
GCF_019037905.1_ASM1903790v1_genomic	Bacillus subtilis	PASS
GCF_019037965.1_ASM1903796v1_genomic	Bacillus subtilis	PASS
GCF_019038065.1_ASM1903806v1_genomic	Bacillus subtilis	PASS
GCF_019464335.1_ASM1946433v1_genomic	Bacillus subtilis	PASS
GCF_019583555.1_ASM1958355v1_genomic	Bacillus subtilis	PASS
GCF_019599105.1_ASM1959910v1_genomic	Bacillus subtilis	PASS
GCF_019704335.1_ASM1970433v1_genomic	Bacillus subtilis	PASS
GCF_019704355.1_ASM1970435v1_genomic	Bacillus subtilis	PASS
GCF_019704375.1_ASM1970437v1_genomic	Bacillus subtilis	PASS
GCF_019704395.1_ASM1970439v1_genomic	Bacillus subtilis	PASS
GCF_019704415.1_ASM1970441v1_genomic	Bacillus subtilis	PASS
GCF_019704435.1_ASM1970443v1_genomic	Bacillus subtilis	PASS
GCF_019704455.1_ASM1970445v1_genomic	Bacillus subtilis	PASS
GCF_019704475.1_ASM1970447v1_genomic	Bacillus subtilis	PASS
GCF_019748415.1_ASM1974841v1_genomic	Bacillus subtilis	PASS
GCF_019748555.1_ASM1974855v1_genomic	Bacillus subtilis	PASS
GCF_019931715.1_ASM1993171v1_genomic	Bacillus subtilis	PASS
GCF_019969135.1_ASM1996913v1_genomic	Bacillus subtilis	PASS
GCF_020166055.1_ASM2016605v1_genomic	Bacillus subtilis	PASS
GCF_020176885.1_ASM2017688v1_genomic	Bacillus subtilis	PASS
GCF_020251265.1_ASM2025126v1_genomic	Bacillus subtilis	PASS
GCF_020311615.1_ASM2031161v1_genomic	Bacillus subtilis	PASS
GCF_020509345.1_ASM2050934v1_genomic	Bacillus subtilis	PASS
GCF_020552025.1_ASM2055202v1_genomic	Bacillus subtilis	PASS
GCF_020552665.1_ASM2055266v1_genomic	Bacillus subtilis	PASS
GCF_020773035.1_ASM2077303v1_genomic	Bacillus subtilis	PASS
GCF_020859605.1_ASM2085960v1_genomic	Bacillus subtilis	PASS
GCF_021172185.1_ASM2117218v1_genomic	Bacillus subtilis	PASS
GCF_021398545.1_ASM2139854v1_genomic	Bacillus subtilis	PASS
GCF_021497525.1_ASM2149752v1_genomic	Bacillus subtilis	PASS
GCF_021497545.1_ASM2149754v1_genomic	Bacillus subtilis	PASS
GCF_021498185.1_ASM2149818v1_genomic	Bacillus subtilis	PASS
GCF_021555035.1_ASM2155503v1_genomic	Bacillus subtilis	PASS
GCF_021728925.1_ASM2172892v1_genomic	Bacillus subtilis	PASS
GCF_021728955.1_ASM2172895v1_genomic	Bacillus subtilis	PASS
GCF_022097155.1_ASM2209715v1_genomic	Bacillus subtilis	PASS
GCF_022370975.1_ASM2237097v1_genomic	Bacillus subtilis	PASS
GCF_022453545.1_ASM2245354v1_genomic	Bacillus subtilis	PASS
GCF_022570515.1_ASM2257051v1_genomic	Bacillus subtilis	PASS
GCF_022647025.1_ASM2264702v1_genomic	Bacillus subtilis	PASS
GCF_022654795.1_ASM2265479v1_genomic	Bacillus subtilis	PASS
GCF_022700895.1_ASM2270089v1_genomic	Bacillus subtilis	PASS
GCF_022700935.1_ASM2270093v1_genomic	Bacillus subtilis	PASS
GCF_022700955.1_ASM2270095v1_genomic	Bacillus subtilis	PASS
GCF_022700975.1_ASM2270097v1_genomic	Bacillus subtilis	PASS
GCF_022701095.1_ASM2270109v1_genomic	Bacillus subtilis	PASS
GCF_022832445.1_ASM2283244v1_genomic	Bacillus subtilis	PASS
GCF_023078435.1_ASM2307843v1_genomic	Bacillus subtilis	PASS
GCF_023148545.1_ASM2314854v1_genomic	Bacillus subtilis	PASS
GCF_023369715.1_ASM2336971v1_genomic	Bacillus subtilis	PASS
GCF_023509705.1_ASM2350970v1_genomic	Bacillus subtilis	PASS
GCF_023518255.2_ASM2351825v2_genomic	Bacillus subtilis	PASS
GCF_023520855.1_ASM2352085v1_genomic	Bacillus subtilis	PASS
GCF_023521175.1_ASM2352117v1_genomic	Bacillus subtilis	PASS
GCF_023521275.1_ASM2352127v1_genomic	Bacillus subtilis	PASS
GCF_023521475.1_ASM2352147v1_genomic	Bacillus subtilis	PASS
GCF_023521595.1_ASM2352159v1_genomic	Bacillus subtilis	PASS
GCF_023521615.1_ASM2352161v1_genomic	Bacillus subtilis	PASS
GCF_023521635.1_ASM2352163v1_genomic	Bacillus subtilis	PASS
GCF_023612315.1_ASM2361231v1_genomic	Bacillus subtilis	PASS
GCF_023614045.1_ASM2361404v1_genomic	Bacillus subtilis	PASS
GCF_023650935.1_ASM2365093v1_genomic	Bacillus subtilis	PASS
GCF_023702085.1_ASM2370208v1_genomic	Bacillus subtilis	PASS
GCF_023702515.1_ASM2370251v1_genomic	Bacillus subtilis	PASS
GCF_023712285.1_ASM2371228v1_genomic	Bacillus subtilis	PASS
GCF_023713145.1_ASM2371314v1_genomic	Bacillus subtilis	PASS
GCF_023713435.1_ASM2371343v1_genomic	Bacillus subtilis	PASS
GCF_023713845.1_ASM2371384v1_genomic	Bacillus subtilis	PASS
GCF_023714065.1_ASM2371406v1_genomic	Bacillus subtilis	PASS
GCF_023714405.1_ASM2371440v1_genomic	Bacillus subtilis	PASS
GCF_023715025.1_ASM2371502v1_genomic	Bacillus subtilis	PASS
GCF_024128815.1_ASM2412881v1_genomic	Bacillus subtilis	PASS
GCF_024220155.1_ASM2422015v1_genomic	Bacillus subtilis	PASS
GCF_024241215.1_ASM2424121v1_genomic	Bacillus subtilis	PASS
GCF_024259785.1_ASM2425978v1_genomic	Bacillus subtilis	PASS
GCF_024262185.1_ASM2426218v1_genomic	Bacillus subtilis	PASS
GCF_024507815.1_ASM2450781v1_genomic	Bacillus subtilis	PASS
GCF_024507835.1_ASM2450783v1_genomic	Bacillus subtilis	PASS
GCF_024507895.1_ASM2450789v1_genomic	Bacillus subtilis	PASS
GCF_024508095.1_ASM2450809v1_genomic	Bacillus subtilis	PASS
GCF_024508175.1_ASM2450817v1_genomic	Bacillus subtilis	PASS
GCF_024508195.1_ASM2450819v1_genomic	Bacillus subtilis	PASS
GCF_024585045.1_ASM2458504v1_genomic	Bacillus subtilis	PASS
GCF_024623085.1_ASM2462308v1_genomic	Bacillus subtilis	PASS
GCF_024653105.1_ASM2465310v1_genomic	Bacillus subtilis	PASS
GCF_024653155.1_ASM2465315v1_genomic	Bacillus subtilis	PASS
GCF_024706255.1_ASM2470625v1_genomic	Bacillus subtilis	PASS
GCF_024733955.1_ASM2473395v1_genomic	Bacillus subtilis	PASS
GCF_024752515.1_ASM2475251v1_genomic	Bacillus subtilis	PASS
GCF_024799885.1_ASM2479988v1_genomic	Bacillus subtilis	PASS
GCF_024800645.1_ASM2480064v1_genomic	Bacillus subtilis	PASS
GCF_024802585.1_ASM2480258v1_genomic	Bacillus subtilis	PASS
GCF_024917115.1_ASM2491711v1_genomic	Bacillus subtilis	PASS
GCF_024917175.1_ASM2491717v1_genomic	Bacillus subtilis	PASS
GCF_024918995.1_ASM2491899v1_genomic	Bacillus subtilis	PASS
GCF_024972835.1_ASM2497283v1_genomic	Bacillus subtilis	PASS
GCF_025021505.1_ASM2502150v1_genomic	Bacillus subtilis	PASS
GCF_025061465.1_ASM2506146v1_genomic	Bacillus subtilis	PASS
GCF_025161015.1_ASM2516101v1_genomic	Bacillus subtilis	PASS
GCF_025245215.1_ASM2524521v1_genomic	Bacillus subtilis	PASS
GCF_025367415.1_ASM2536741v1_genomic	Bacillus subtilis	PASS
GCF_025367495.1_ASM2536749v1_genomic	Bacillus subtilis	PASS
GCF_025426155.1_ASM2542615v1_genomic	Bacillus subtilis	PASS
GCF_025449235.1_ASM2544923v1_genomic	Bacillus subtilis	PASS
GCF_025452155.1_ASM2545215v1_genomic	Bacillus subtilis	PASS
GCF_025460705.1_ASM2546070v1_genomic	Bacillus subtilis	PASS
GCF_025502505.1_ASM2550250v1_genomic	Bacillus subtilis	PASS
GCF_025502545.1_ASM2550254v1_genomic	Bacillus subtilis	PASS
GCF_025642835.1_ASM2564283v1_genomic	Bacillus subtilis	PASS
GCF_025716825.1_ASM2571682v1_genomic	Bacillus subtilis	PASS
GCF_025728295.1_ASM2572829v1_genomic	Bacillus subtilis	PASS
GCF_025732155.1_ASM2573215v1_genomic	Bacillus subtilis	PASS
GCF_025809235.1_ASM2580923v1_genomic	Bacillus subtilis	PASS
GCF_025837035.1_ASM2583703v1_genomic	Bacillus subtilis	PASS
GCF_025847675.1_ASM2584767v1_genomic	Bacillus subtilis	PASS
GCF_025914075.1_ASM2591407v1_genomic	Bacillus subtilis	PASS
GCF_026153475.1_ASM2615347v1_genomic	Bacillus subtilis	PASS
GCF_026410045.1_ASM2641004v1_genomic	Bacillus subtilis	PASS
GCF_026639155.1_ASM2663915v1_genomic	Bacillus subtilis	PASS
GCF_026799655.1_ASM2679965v1_genomic	Bacillus subtilis	PASS
GCF_900095345.1_ASM90009534v1_genomic	Bacillus subtilis	PASS
GCF_900110305.1_IMG-taxon_2623620441_annotated_assembly_genomic	Bacillus subtilis	PASS
GCF_900156365.1_IMG-taxon_2708742540_annotated_assembly_genomic	Bacillus subtilis	PASS
GCF_900177305.1_IMG-taxon_2547132509_annotated_assembly_genomic	Bacillus subtilis	PASS
GCF_900215365.1_IMG-taxon_2545824506_annotated_assembly_genomic	Bacillus subtilis	PASS
GCF_900445475.1_27294_A01_genomic	Bacillus subtilis	PASS
GCF_900454375.1_59024_G01_genomic	Bacillus subtilis	PASS
GCF_902362345.1_MGYG-HGUT-00012_genomic	Bacillus subtilis	PASS
GCF_905310975.1_NRS6085_genomic	Bacillus subtilis	PASS
GCF_905310985.1_NRS6099_genomic	Bacillus subtilis	PASS
GCF_905310995.1_NRS6103_genomic	Bacillus subtilis	PASS
GCF_905311005.1_NRS6092_genomic	Bacillus subtilis	PASS
GCF_905311015.1_NRS6094_genomic	Bacillus subtilis	PASS
GCF_905311025.1_NRS6084_genomic	Bacillus subtilis	PASS
GCF_905311035.1_NRS6096_genomic	Bacillus subtilis	PASS
GCF_905311375.1_NRS6111_genomic	Bacillus subtilis	PASS
GCF_905311385.1_NRS6116_genomic	Bacillus subtilis	PASS
GCF_905311395.1_NRS6108_genomic	Bacillus subtilis	PASS
GCF_905311405.1_NRS6107_genomic	Bacillus subtilis	PASS
GCF_905311415.1_NRS6110_genomic	Bacillus subtilis	PASS
GCF_905311425.1_NRS6105_genomic	Bacillus subtilis	PASS
GCF_905311435.1_NRS6118_genomic	Bacillus subtilis	PASS
GCF_905312035.1_NRS6120_genomic	Bacillus subtilis	PASS
GCF_905315015.1_NRS6132_genomic	Bacillus subtilis	PASS
GCF_905315025.1_NRS6131_genomic	Bacillus subtilis	PASS
GCF_905315035.1_NRS6121_genomic	Bacillus subtilis	PASS
GCF_905315045.1_NRS6127_genomic	Bacillus subtilis	PASS
GCF_905315055.1_NRS6128_genomic	Bacillus subtilis	PASS
GCF_905315375.1_NRS6141_genomic	Bacillus subtilis	PASS
GCF_905315385.1_NRS6137_genomic	Bacillus subtilis	PASS
GCF_905315395.1_NRS6134_genomic	Bacillus subtilis	PASS
GCF_905315685.1_NRS6145_genomic	Bacillus subtilis	PASS
GCF_905315695.1_NRS6148_genomic	Bacillus subtilis	PASS
GCF_905315705.1_NRS6153_genomic	Bacillus subtilis	PASS
GCF_905315715.1_NRS6160_genomic	Bacillus subtilis	PASS
GCF_905318255.1_NRS6181_genomic	Bacillus subtilis	PASS
GCF_905319135.1_NRS6186_genomic	Bacillus subtilis	PASS
GCF_905319145.1_NRS6185_genomic	Bacillus subtilis	PASS
GCF_905319155.1_NRS6183_genomic	Bacillus subtilis	PASS
GCF_905319535.1_NRS6202_genomic	Bacillus subtilis	PASS
GCF_905319545.1_NRS6187_genomic	Bacillus subtilis	PASS
GCF_905319555.1_NRS6194_genomic	Bacillus subtilis	PASS
GCF_905319565.1_NRS6190_genomic	Bacillus subtilis	PASS
GCF_905319795.1_NRS6204_genomic	Bacillus subtilis	PASS
GCF_905319815.1_NRS6206_genomic	Bacillus subtilis	PASS
GCF_905319825.1_NRS6205_genomic	Bacillus subtilis	PASS
GCF_000015785.2_ASM1578v2_genomic	Bacillus velezensis	PASS
GCF_000262385.1_ASM26238v1_genomic	Bacillus velezensis	PASS
GCF_000283695.1_ASM28369v1_genomic	Bacillus velezensis	PASS
GCF_000284395.1_ASM28439v1_genomic	Bacillus velezensis	PASS
GCF_000319475.1_ASM31947v1_genomic	Bacillus velezensis	PASS
GCF_000341875.1_ASM34187v1_genomic	Bacillus velezensis	PASS
GCF_000455565.1_ucmb5033v1_genomic	Bacillus velezensis	PASS
GCF_000455585.1_ucmb5113v1_genomic	Bacillus velezensis	PASS
GCF_000493375.1_BAPNAU_WGS_genomic	Bacillus velezensis	PASS
GCF_000508125.2_ASM50812v2_genomic	Bacillus velezensis	PASS
GCF_000583065.1_ASM58306v1_genomic	Bacillus velezensis	PASS
GCF_000685725.1_ASM68572v1_genomic	Bacillus velezensis	PASS
GCF_000740715.1_ASM74071v1_genomic	Bacillus velezensis	PASS
GCF_000769555.1_ASM76955v1_genomic	Bacillus velezensis	PASS
GCF_000786145.2_ASM78614v2_genomic	Bacillus velezensis	PASS
GCF_000815275.2_ASM81527v2_genomic	Bacillus velezensis	PASS
GCF_000833005.1_ASM83300v1_genomic	Bacillus velezensis	PASS
GCF_000875875.2_ASM87587v2_genomic	Bacillus velezensis	PASS
GCF_000973485.1_ASM97348v1_genomic	Bacillus velezensis	PASS
GCF_000973585.1_ASM97358v1_genomic	Bacillus velezensis	PASS
GCF_000987825.1_ASM98782v1_genomic	Bacillus velezensis	PASS
GCF_000988345.1_ASM98834v1_genomic	Bacillus velezensis	PASS
GCF_001023595.1_ASM102359v1_genomic	Bacillus velezensis	PASS
GCF_001267695.1_ASM126769v1_genomic	Bacillus velezensis	PASS
GCF_001536925.1_BMC_PRJEB12378v1_genomic	Bacillus velezensis	PASS
GCF_001593395.2_ASM159339v2_genomic	Bacillus velezensis	PASS
GCF_001639945.1_ASM163994v1_genomic	Bacillus velezensis	PASS
GCF_001685645.1_ASM168564v1_genomic	Bacillus velezensis	PASS
GCF_001687745.1_ASM168774v1_genomic	Bacillus velezensis	PASS
GCF_001723585.1_ASM172358v1_genomic	Bacillus velezensis	PASS
GCF_001752685.2_ASM175268v2_genomic	Bacillus velezensis	PASS
GCF_001854345.1_ASM185434v1_genomic	Bacillus velezensis	PASS
GCF_001857985.1_ASM185798v1_genomic	Bacillus velezensis	PASS
GCF_002005345.1_ASM200534v1_genomic	Bacillus velezensis	PASS
GCF_002057535.1_ASM205753v1_genomic	Bacillus velezensis	PASS
GCF_002072695.1_ASM207269v1_genomic	Bacillus velezensis	PASS
GCF_002105595.1_ASM210559v1_genomic	Bacillus velezensis	PASS
GCF_002117165.1_ASM211716v1_genomic	Bacillus velezensis	PASS
GCF_002165455.1_ASM216545v1_genomic	Bacillus velezensis	PASS
GCF_002192235.1_ASM219223v1_genomic	Bacillus velezensis	PASS
GCF_002204665.1_ASM220466v1_genomic	Bacillus velezensis	PASS
GCF_002205715.1_ASM220571v1_genomic	Bacillus velezensis	PASS
GCF_002216755.1_ASM221675v1_genomic	Bacillus velezensis	PASS
GCF_002237515.1_ASM223751v1_genomic	Bacillus velezensis	PASS
GCF_002238395.1_ASM223839v1_genomic	Bacillus velezensis	PASS
GCF_002243325.2_ASM224332v2_genomic	Bacillus velezensis	PASS
GCF_002290045.1_ASM229004v1_genomic	Bacillus velezensis	PASS
GCF_002310315.1_ASM231031v1_genomic	Bacillus velezensis	PASS
GCF_002327165.1_ASM232716v1_genomic	Bacillus velezensis	PASS
GCF_002556565.1_ASM255656v1_genomic	Bacillus velezensis	PASS
GCF_002688525.1_ASM268852v1_genomic	Bacillus velezensis	PASS
GCF_002741705.1_ASM274170v1_genomic	Bacillus velezensis	PASS
GCF_002747285.1_ASM274728v1_genomic	Bacillus velezensis	PASS
GCF_002751885.1_ASM275188v1_genomic	Bacillus velezensis	PASS
GCF_002761535.1_ASM276153v1_genomic	Bacillus velezensis	PASS
GCF_002764075.1_ASM276407v1_genomic	Bacillus velezensis	PASS
GCF_002796465.1_ASM279646v1_genomic	Bacillus velezensis	PASS
GCF_002844125.1_ASM284412v1_genomic	Bacillus velezensis	PASS
GCF_002845365.1_ASM284536v1_genomic	Bacillus velezensis	PASS
GCF_002850475.1_ASM285047v1_genomic	Bacillus velezensis	PASS
GCF_002893845.1_ASM289384v1_genomic	Bacillus velezensis	PASS
GCF_002909615.1_ASM290961v1_genomic	Bacillus velezensis	PASS
GCF_002916875.1_ASM291687v1_genomic	Bacillus velezensis	PASS
GCF_002944585.1_ASM294458v1_genomic	Bacillus velezensis	PASS
GCF_002968415.1_ASM296841v1_genomic	Bacillus velezensis	PASS
GCF_002993245.1_ASM299324v1_genomic	Bacillus velezensis	PASS
GCF_002998885.1_ASM299888v1_genomic	Bacillus velezensis	PASS
GCF_002998915.1_ASM299891v1_genomic	Bacillus velezensis	PASS
GCF_003012025.1_ASM301202v1_genomic	Bacillus velezensis	PASS
GCF_003045165.1_ASM304516v1_genomic	Bacillus velezensis	PASS
GCF_003047005.1_ASM304700v1_genomic	Bacillus velezensis	PASS
GCF_003047025.1_ASM304702v1_genomic	Bacillus velezensis	PASS
GCF_003047045.1_ASM304704v1_genomic	Bacillus velezensis	PASS
GCF_003058025.1_ASM305802v1_genomic	Bacillus velezensis	PASS
GCF_003071465.1_ASM307146v1_genomic	Bacillus velezensis	PASS
GCF_003073255.1_ASM307325v1_genomic	Bacillus velezensis	PASS
GCF_003073455.1_ASM307345v1_genomic	Bacillus velezensis	PASS
GCF_003076535.1_ASM307653v1_genomic	Bacillus velezensis	PASS
GCF_003150855.1_ASM315085v2_genomic	Bacillus velezensis	PASS
GCF_003184945.1_ASM318494v1_genomic	Bacillus velezensis	PASS
GCF_003265265.1_ASM326526v1_genomic	Bacillus velezensis	PASS
GCF_003285085.1_ASM328508v1_genomic	Bacillus velezensis	PASS
GCF_003321435.1_ASM332143v1_genomic	Bacillus velezensis	PASS
GCF_003390415.1_ASM339041v1_genomic	Bacillus velezensis	PASS
GCF_003431885.1_ASM343188v1_genomic	Bacillus velezensis	PASS
GCF_003432425.1_ASM343242v1_genomic	Bacillus velezensis	PASS
GCF_003441635.1_ASM344163v1_genomic	Bacillus velezensis	PASS
GCF_003546955.1_ASM354695v1_genomic	Bacillus velezensis	PASS
GCF_003555525.1_ASM355552v1_genomic	Bacillus velezensis	PASS
GCF_003573875.1_ASM357387v1_genomic	Bacillus velezensis	PASS
GCF_003612755.1_ASM361275v1_genomic	Bacillus velezensis	PASS
GCF_003667745.1_ASM366774v1_genomic	Bacillus velezensis	PASS
GCF_003721475.1_ASM372147v1_genomic	Bacillus velezensis	PASS
GCF_003854915.1_ASM385491v1_genomic	Bacillus velezensis	PASS
GCF_003855275.1_ASM385527v1_genomic	Bacillus velezensis	PASS
GCF_003860445.1_ASM386044v1_genomic	Bacillus velezensis	PASS
GCF_004009895.1_ASM400989v1_genomic	Bacillus velezensis	PASS
GCF_004101805.1_ASM410180v1_genomic	Bacillus velezensis	PASS
GCF_004119575.1_ASM411957v1_genomic	Bacillus velezensis	PASS
GCF_004119735.1_ASM411973v1_genomic	Bacillus velezensis	PASS
GCF_004119855.1_ASM411985v1_genomic	Bacillus velezensis	PASS
GCF_004135455.2_ASM413545v2_genomic	Bacillus velezensis	PASS
GCF_004294525.1_ASM429452v1_genomic	Bacillus velezensis	PASS
GCF_004329055.1_ASM432905v1_genomic	Bacillus velezensis	PASS
GCF_004331895.1_ASM433189v1_genomic	Bacillus velezensis	PASS
GCF_004337575.1_ASM433757v1_genomic	Bacillus velezensis	PASS
GCF_004337655.1_ASM433765v1_genomic	Bacillus velezensis	PASS
GCF_004378445.1_ASM437844v1_genomic	Bacillus velezensis	PASS
GCF_004799565.1_ASM479956v1_genomic	Bacillus velezensis	PASS
GCF_005518225.1_ASM551822v1_genomic	Bacillus velezensis	PASS
GCF_005696395.1_ASM569639v1_genomic	Bacillus velezensis	PASS
GCF_005843905.1_ASM584390v1_genomic	Bacillus velezensis	PASS
GCF_006489235.1_ASM648923v1_genomic	Bacillus velezensis	PASS
GCF_006489255.1_ASM648925v1_genomic	Bacillus velezensis	PASS
GCF_006489275.1_ASM648927v1_genomic	Bacillus velezensis	PASS
GCF_006965525.1_ASM696552v1_genomic	Bacillus velezensis	PASS
GCF_006974185.1_ASM697418v1_genomic	Bacillus velezensis	PASS
GCF_007671905.1_ASM767190v1_genomic	Bacillus velezensis	PASS
GCF_007672335.1_ASM767233v1_genomic	Bacillus velezensis	PASS
GCF_007673335.1_ASM767333v1_genomic	Bacillus velezensis	PASS
GCF_007673445.1_ASM767344v1_genomic	Bacillus velezensis	PASS
GCF_007678125.1_ASM767812v1_genomic	Bacillus velezensis	PASS
GCF_007681135.1_ASM768113v1_genomic	Bacillus velezensis	PASS
GCF_007681175.1_ASM768117v1_genomic	Bacillus velezensis	PASS
GCF_007681655.1_ASM768165v1_genomic	Bacillus velezensis	PASS
GCF_007681715.1_ASM768171v1_genomic	Bacillus velezensis	PASS
GCF_007681795.1_ASM768179v1_genomic	Bacillus velezensis	PASS
GCF_007681885.1_ASM768188v1_genomic	Bacillus velezensis	PASS
GCF_007682065.1_ASM768206v1_genomic	Bacillus velezensis	PASS
GCF_007682255.1_ASM768225v1_genomic	Bacillus velezensis	PASS
GCF_007844975.1_ASM784497v1_genomic	Bacillus velezensis	PASS
GCF_007845055.1_ASM784505v1_genomic	Bacillus velezensis	PASS
GCF_008244925.1_ASM824492v1_genomic	Bacillus velezensis	PASS
GCF_008367895.1_ASM836789v1_genomic	Bacillus velezensis	PASS
GCF_008727675.1_ASM872767v1_genomic	Bacillus velezensis	PASS
GCF_008802875.1_ASM880287v1_genomic	Bacillus velezensis	PASS
GCF_009362235.1_ASM936223v1_genomic	Bacillus velezensis	PASS
GCF_009663035.1_ASM966303v1_genomic	Bacillus velezensis	PASS
GCF_009664145.1_ASM966414v1_genomic	Bacillus velezensis	PASS
GCF_009683055.1_ASM968305v1_genomic	Bacillus velezensis	PASS
GCF_009683125.1_ASM968312v1_genomic	Bacillus velezensis	PASS
GCF_009683155.1_ASM968315v1_genomic	Bacillus velezensis	PASS
GCF_009734085.1_ASM973408v1_genomic	Bacillus velezensis	PASS
GCF_009738165.1_ASM973816v1_genomic	Bacillus velezensis	PASS
GCF_009789615.1_ASM978961v1_genomic	Bacillus velezensis	PASS
GCF_009834085.1_ASM983408v1_genomic	Bacillus velezensis	PASS
GCF_009856975.1_ASM985697v1_genomic	Bacillus velezensis	PASS
GCF_009913295.1_ASM991329v1_genomic	Bacillus velezensis	PASS
GCF_009913315.1_ASM991331v1_genomic	Bacillus velezensis	PASS
GCF_009913335.1_ASM991333v1_genomic	Bacillus velezensis	PASS
GCF_009913355.1_ASM991335v1_genomic	Bacillus velezensis	PASS
GCF_009913375.1_ASM991337v1_genomic	Bacillus velezensis	PASS
GCF_009913475.1_ASM991347v1_genomic	Bacillus velezensis	PASS
GCF_009913495.1_ASM991349v1_genomic	Bacillus velezensis	PASS
GCF_009914135.1_ASM991413v1_genomic	Bacillus velezensis	PASS
GCF_009914175.1_ASM991417v1_genomic	Bacillus velezensis	PASS
GCF_009931675.1_ASM993167v1_genomic	Bacillus velezensis	PASS
GCF_009935125.1_ASM993512v1_genomic	Bacillus velezensis	PASS
GCF_009935175.1_ASM993517v1_genomic	Bacillus velezensis	PASS
GCF_009935255.1_ASM993525v1_genomic	Bacillus velezensis	PASS
GCF_009935295.1_ASM993529v1_genomic	Bacillus velezensis	PASS
GCF_009935345.1_ASM993534v1_genomic	Bacillus velezensis	PASS
GCF_009935375.1_ASM993537v1_genomic	Bacillus velezensis	PASS
GCF_009935395.1_ASM993539v1_genomic	Bacillus velezensis	PASS
GCF_009935455.1_ASM993545v1_genomic	Bacillus velezensis	PASS
GCF_009935495.1_ASM993549v1_genomic	Bacillus velezensis	PASS
GCF_010580625.1_ASM1058062v1_genomic	Bacillus velezensis	PASS
GCF_010671715.1_ASM1067171v1_genomic	Bacillus velezensis	PASS
GCF_011032725.1_ASM1103272v1_genomic	Bacillus velezensis	PASS
GCF_011043745.1_ASM1104374v1_genomic	Bacillus velezensis	PASS
GCF_011100445.1_ASM1110044v1_genomic	Bacillus velezensis	PASS
GCF_011769925.1_ASM1176992v1_genomic	Bacillus velezensis	PASS
GCF_011784665.1_ASM1178466v1_genomic	Bacillus velezensis	PASS
GCF_012226065.1_ASM1222606v1_genomic	Bacillus velezensis	PASS
GCF_012275165.1_ASM1227516v1_genomic	Bacillus velezensis	PASS
GCF_012647845.1_ASM1264784v1_genomic	Bacillus velezensis	PASS
GCF_012972775.1_ASM1297277v1_genomic	Bacillus velezensis	PASS
GCF_012972785.1_ASM1297278v1_genomic	Bacillus velezensis	PASS
GCF_013122275.1_ASM1312227v1_genomic	Bacillus velezensis	PASS
GCF_013201135.1_ASM1320113v1_genomic	Bacillus velezensis	PASS
GCF_013201465.1_ASM1320146v1_genomic	Bacillus velezensis	PASS
GCF_013266865.1_ASM1326686v1_genomic	Bacillus velezensis	PASS
GCF_013267055.1_ASM1326705v1_genomic	Bacillus velezensis	PASS
GCF_013284785.2_ASM1328478v2_genomic	Bacillus velezensis	PASS
GCF_013285085.2_ASM1328508v2_genomic	Bacillus velezensis	PASS
GCF_013348705.1_ASM1334870v1_genomic	Bacillus velezensis	PASS
GCF_013367755.1_ASM1336775v1_genomic	Bacillus velezensis	PASS
GCF_013401395.2_ASM1340139v2_genomic	Bacillus velezensis	PASS
GCF_013694265.1_ASM1369426v1_genomic	Bacillus velezensis	PASS
GCF_013701805.1_ASM1370180v1_genomic	Bacillus velezensis	PASS
GCF_013875015.1_ASM1387501v1_genomic	Bacillus velezensis	PASS
GCF_014048285.1_ASM1404828v1_genomic	Bacillus velezensis	PASS
GCF_014048385.1_ASM1404838v1_genomic	Bacillus velezensis	PASS
GCF_014117505.1_ASM1411750v1_genomic	Bacillus velezensis	PASS
GCF_014180705.2_ASM1418070v2_genomic	Bacillus velezensis	PASS
GCF_014204475.1_ASM1420447v1_genomic	Bacillus velezensis	PASS
GCF_014211995.1_ASM1421199v1_genomic	Bacillus velezensis	PASS
GCF_014358035.1_ASM1435803v1_genomic	Bacillus velezensis	PASS
GCF_014495825.1_ASM1449582v1_genomic	Bacillus velezensis	PASS
GCF_014622705.1_ASM1462270v1_genomic	Bacillus velezensis	PASS
GCF_014706595.1_ASM1470659v1_genomic	Bacillus velezensis	PASS
GCF_014764325.1_ASM1476432v1_genomic	Bacillus velezensis	PASS
GCF_014841075.1_ASM1484107v1_genomic	Bacillus velezensis	PASS
GCF_014842935.1_ASM1484293v1_genomic	Bacillus velezensis	PASS
GCF_014961825.1_ASM1496182v1_genomic	Bacillus velezensis	PASS
GCF_015239615.1_ASM1523961v1_genomic	Bacillus velezensis	PASS
GCF_015277495.1_ASM1527749v1_genomic	Bacillus velezensis	PASS
GCF_015291865.1_ASM1529186v1_genomic	Bacillus velezensis	PASS
GCF_015354255.1_ASM1535425v1_genomic	Bacillus velezensis	PASS
GCF_015732475.1_ASM1573247v1_genomic	Bacillus velezensis	PASS
GCF_016065635.1_ASM1606563v1_genomic	Bacillus velezensis	PASS
GCF_016406185.1_ASM1640618v1_genomic	Bacillus velezensis	PASS
GCF_016415725.1_ASM1641572v1_genomic	Bacillus velezensis	PASS
GCF_016766595.1_ASM1676659v1_genomic	Bacillus velezensis	PASS
GCF_016772025.1_ASM1677202v1_genomic	Bacillus velezensis	PASS
GCF_016801735.1_ASM1680173v1_genomic	Bacillus velezensis	PASS
GCF_016834435.1_ASM1683443v1_genomic	Bacillus velezensis	PASS
GCF_016859395.1_ASM1685939v1_genomic	Bacillus velezensis	PASS
GCF_016888865.1_ASM1688886v1_genomic	Bacillus velezensis	PASS
GCF_016904925.1_ASM1690492v1_genomic	Bacillus velezensis	PASS
GCF_017255135.1_ASM1725513v1_genomic	Bacillus velezensis	PASS
GCF_017309035.1_ASM1730903v1_genomic	Bacillus velezensis	PASS
GCF_017347625.1_ASM1734762v1_genomic	Bacillus velezensis	PASS
GCF_017599365.1_ASM1759936v1_genomic	Bacillus velezensis	PASS
GCF_017742975.1_ASM1774297v1_genomic	Bacillus velezensis	PASS
GCF_017948225.1_ASM1794822v1_genomic	Bacillus velezensis	PASS
GCF_018223705.1_ASM1822370v1_genomic	Bacillus velezensis	PASS
GCF_018224265.1_ASM1822426v1_genomic	Bacillus velezensis	PASS
GCF_018278845.1_ASM1827884v1_genomic	Bacillus velezensis	PASS
GCF_018398955.1_ASM1839895v1_genomic	Bacillus velezensis	PASS
GCF_018406485.1_ASM1840648v1_genomic	Bacillus velezensis	PASS
GCF_018415955.1_ASM1841595v1_genomic	Bacillus velezensis	PASS
GCF_018629015.1_ASM1862901v1_genomic	Bacillus velezensis	PASS
GCF_018732185.1_ASM1873218v1_genomic	Bacillus velezensis	PASS
GCF_018771665.1_ASM1877166v1_genomic	Bacillus velezensis	PASS
GCF_018771705.1_ASM1877170v1_genomic	Bacillus velezensis	PASS
GCF_018775385.1_ASM1877538v1_genomic	Bacillus velezensis	PASS
GCF_018866365.1_ASM1886636v1_genomic	Bacillus velezensis	PASS
GCF_019163475.1_ASM1916347v1_genomic	Bacillus velezensis	PASS
GCF_019222745.1_ASM1922274v1_genomic	Bacillus velezensis	PASS
GCF_019285615.1_ASM1928561v1_genomic	Bacillus velezensis	PASS
GCF_019334525.1_ASM1933452v1_genomic	Bacillus velezensis	PASS
GCF_019449395.1_ASM1944939v1_genomic	Bacillus velezensis	PASS
GCF_019455705.1_ASM1945570v1_genomic	Bacillus velezensis	PASS
GCF_019464595.1_ASM1946459v1_genomic	Bacillus velezensis	PASS
GCF_019551675.1_ASM1955167v1_genomic	Bacillus velezensis	PASS
GCF_019603335.1_ASM1960333v1_genomic	Bacillus velezensis	PASS
GCF_019720775.1_ASM1972077v1_genomic	Bacillus velezensis	PASS
GCF_019733375.1_ASM1973337v1_genomic	Bacillus velezensis	PASS
GCF_019754015.1_ASM1975401v1_genomic	Bacillus velezensis	PASS
GCF_019880485.1_ASM1988048v1_genomic	Bacillus velezensis	PASS
GCF_020084885.1_ASM2008488v1_genomic	Bacillus velezensis	PASS
GCF_020149525.1_ASM2014952v1_genomic	Bacillus velezensis	PASS
GCF_020149955.1_ASM2014995v1_genomic	Bacillus velezensis	PASS
GCF_020150015.1_ASM2015001v1_genomic	Bacillus velezensis	PASS
GCF_020162235.1_ASM2016223v1_genomic	Bacillus velezensis	PASS
GCF_020888905.1_ASM2088890v1_genomic	Bacillus velezensis	PASS
GCF_020911825.1_ASM2091182v1_genomic	Bacillus velezensis	PASS
GCF_020995365.1_ASM2099536v1_genomic	Bacillus velezensis	PASS
GCF_021184205.1_ASM2118420v1_genomic	Bacillus velezensis	PASS
GCF_021228895.1_ASM2122889v1_genomic	Bacillus velezensis	PASS
GCF_021245705.1_ASM2124570v1_genomic	Bacillus velezensis	PASS
GCF_021366475.1_ASM2136647v1_genomic	Bacillus velezensis	PASS
GCF_021390055.1_ASM2139005v1_genomic	Bacillus velezensis	PASS
GCF_021397795.1_ASM2139779v1_genomic	Bacillus velezensis	PASS
GCF_021495995.1_ASM2149599v1_genomic	Bacillus velezensis	PASS
GCF_021559715.1_ASM2155971v1_genomic	Bacillus velezensis	PASS
GCF_021650855.1_ASM2165085v1_genomic	Bacillus velezensis	PASS
GCF_021892375.1_ASM2189237v1_genomic	Bacillus velezensis	PASS
GCF_022313395.1_ASM2231339v1_genomic	Bacillus velezensis	PASS
GCF_022344025.1_ASM2234402v1_genomic	Bacillus velezensis	PASS
GCF_022370935.1_ASM2237093v1_genomic	Bacillus velezensis	PASS
GCF_022371095.1_ASM2237109v1_genomic	Bacillus velezensis	PASS
GCF_022385175.1_ASM2238517v1_genomic	Bacillus velezensis	PASS
GCF_022385235.1_ASM2238523v1_genomic	Bacillus velezensis	PASS
GCF_022488425.1_ASM2248842v1_genomic	Bacillus velezensis	PASS
GCF_022494925.1_ASM2249492v1_genomic	Bacillus velezensis	PASS
GCF_022700875.1_ASM2270087v1_genomic	Bacillus velezensis	PASS
GCF_022760025.1_ASM2276002v1_genomic	Bacillus velezensis	PASS
GCF_022816825.1_ASM2281682v1_genomic	Bacillus velezensis	PASS
GCF_022828405.1_ASM2282840v1_genomic	Bacillus velezensis	PASS
GCF_022869125.1_ASM2286912v1_genomic	Bacillus velezensis	PASS
GCF_022870725.1_ASM2287072v1_genomic	Bacillus velezensis	PASS
GCF_022964915.1_ASM2296491v1_genomic	Bacillus velezensis	PASS
GCF_023093915.1_ASM2309391v1_genomic	Bacillus velezensis	PASS
GCF_023147385.1_ASM2314738v1_genomic	Bacillus velezensis	PASS
GCF_023278305.1_ASM2327830v1_genomic	Bacillus velezensis	PASS
GCF_023373485.1_ASM2337348v1_genomic	Bacillus velezensis	PASS
GCF_023502635.1_ASM2350263v1_genomic	Bacillus velezensis	PASS
GCF_023516155.1_ASM2351615v1_genomic	Bacillus velezensis	PASS
GCF_023516175.1_ASM2351617v1_genomic	Bacillus velezensis	PASS
GCF_023516195.1_ASM2351619v1_genomic	Bacillus velezensis	PASS
GCF_023546985.1_ASM2354698v1_genomic	Bacillus velezensis	PASS
GCF_023573165.1_ASM2357316v1_genomic	Bacillus velezensis	PASS
GCF_023573185.1_ASM2357318v1_genomic	Bacillus velezensis	PASS
GCF_023573205.1_ASM2357320v1_genomic	Bacillus velezensis	PASS
GCF_023573225.1_ASM2357322v1_genomic	Bacillus velezensis	PASS
GCF_023573245.1_ASM2357324v1_genomic	Bacillus velezensis	PASS
GCF_023573265.1_ASM2357326v1_genomic	Bacillus velezensis	PASS
GCF_023573285.1_ASM2357328v1_genomic	Bacillus velezensis	PASS
GCF_023573305.1_ASM2357330v1_genomic	Bacillus velezensis	PASS
GCF_023573325.1_ASM2357332v1_genomic	Bacillus velezensis	PASS
GCF_023573345.1_ASM2357334v1_genomic	Bacillus velezensis	PASS
GCF_023573365.1_ASM2357336v1_genomic	Bacillus velezensis	PASS
GCF_023573385.1_ASM2357338v1_genomic	Bacillus velezensis	PASS
GCF_023573405.1_ASM2357340v1_genomic	Bacillus velezensis	PASS
GCF_023573425.1_ASM2357342v1_genomic	Bacillus velezensis	PASS
GCF_023573445.1_ASM2357344v1_genomic	Bacillus velezensis	PASS
GCF_023573465.1_ASM2357346v1_genomic	Bacillus velezensis	PASS
GCF_023573485.1_ASM2357348v1_genomic	Bacillus velezensis	PASS
GCF_023573505.1_ASM2357350v1_genomic	Bacillus velezensis	PASS
GCF_023573525.1_ASM2357352v1_genomic	Bacillus velezensis	PASS
GCF_023586825.3_ASM2358682v3_genomic	Bacillus velezensis	PASS
GCF_023586845.4_ASM2358684v4_genomic	Bacillus velezensis	PASS
GCF_023614465.1_ASM2361446v1_genomic	Bacillus velezensis	PASS
GCF_023822685.1_ASM2382268v1_genomic	Bacillus velezensis	PASS
GCF_023823715.1_ASM2382371v1_genomic	Bacillus velezensis	PASS
GCF_023823735.1_ASM2382373v1_genomic	Bacillus velezensis	PASS
GCF_023921085.1_ASM2392108v1_genomic	Bacillus velezensis	PASS
GCF_024134605.1_ASM2413460v1_genomic	Bacillus velezensis	PASS
GCF_024138575.1_ASM2413857v1_genomic	Bacillus velezensis	PASS
GCF_024218535.1_ASM2421853v1_genomic	Bacillus velezensis	PASS
GCF_024295405.1_ASM2429540v1_genomic	Bacillus velezensis	PASS
GCF_024408125.1_ASM2440812v1_genomic	Bacillus velezensis	PASS
GCF_024499135.1_ASM2449913v1_genomic	Bacillus velezensis	PASS
GCF_024508215.1_ASM2450821v1_genomic	Bacillus velezensis	PASS
GCF_024610615.1_ASM2461061v1_genomic	Bacillus velezensis	PASS
GCF_024637955.1_ASM2463795v1_genomic	Bacillus velezensis	PASS
GCF_024666145.1_ASM2466614v1_genomic	Bacillus velezensis	PASS
GCF_024734115.1_ASM2473411v1_genomic	Bacillus velezensis	PASS
GCF_024734625.1_ASM2473462v1_genomic	Bacillus velezensis	PASS
GCF_024793885.1_ASM2479388v1_genomic	Bacillus velezensis	PASS
GCF_024800625.1_ASM2480062v1_genomic	Bacillus velezensis	PASS
GCF_024917135.1_ASM2491713v1_genomic	Bacillus velezensis	PASS
GCF_024919095.1_ASM2491909v1_genomic	Bacillus velezensis	PASS
GCF_024925505.1_ASM2492550v1_genomic	Bacillus velezensis	PASS
GCF_025753225.1_ASM2575322v1_genomic	Bacillus velezensis	PASS
GCF_025758105.1_ASM2575810v1_genomic	Bacillus velezensis	PASS
GCF_025837115.1_ASM2583711v1_genomic	Bacillus velezensis	PASS
GCF_025837135.1_ASM2583713v1_genomic	Bacillus velezensis	PASS
GCF_025857215.1_ASM2585721v1_genomic	Bacillus velezensis	PASS
GCF_025914055.1_ASM2591405v1_genomic	Bacillus velezensis	PASS
GCF_025917635.1_ASM2591763v1_genomic	Bacillus velezensis	PASS
GCF_026156315.1_ASM2615631v1_genomic	Bacillus velezensis	PASS
GCF_026210635.1_ASM2621063v1_genomic	Bacillus velezensis	PASS
GCF_026240675.1_ASM2624067v1_genomic	Bacillus velezensis	PASS
GCF_026241745.1_ASM2624174v1_genomic	Bacillus velezensis	PASS
GCF_026254485.1_ASM2625448v1_genomic	Bacillus velezensis	PASS
GCF_026275485.1_ASM2627548v1_genomic	Bacillus velezensis	PASS
GCF_026786545.1_ASM2678654v1_genomic	Bacillus velezensis	PASS
GCF_026787705.1_ASM2678770v1_genomic	Bacillus velezensis	PASS
[truncated: 95 more rows]

## Sheet: Supplementary Table S2
Supplementary Table S2. Pangenome openness and average genome size of the Bs group species.
The λ value represents the calculated normalized index of species openness, STD denotes the standard deviation, and Average genome size indicates the computed mean size of the species genomes, utilized for determining the distribution positions in Figure 6.
Species	λ value	STD	Average genome size
Bacillus amyloliquefaciens	0.19457	0.00112202	3.99867e+06
Bacillus atrophaeus	0.19572	0.00112205	4.15374e+06
Bacillus halotolerans	0.187962	0.00085618	4.1379e+06
Bacillus inaquosorum	0.15926	0.000805818	4.23519e+06
Bacillus licheniformis	0.115109	0.00099262	4.27013e+06
Bacillus mojavensis	0.0940011	0.00182945	4.00624e+06
Bacillus paralicheniformis	0.196387	0.00137553	4.3796e+06
Bacillus siamensis	0.152887	0.00268952	3.93285e+06
Bacillus sonorensis	0.252873	0.00362434	4604157
Bacillus spizizenii	0.172631	0.00139728	4.06244e+06
Bacillus stercoris	0.102574	0.00196186	4.08573e+06
Bacillus subtilis	0.225424	0.000777941	4.14285e+06
Bacillus tequilensis	0.089825	0.00951045	3.92562e+06
Bacillus vallismortis	0.147464	0.00198653	3.99193e+06
Bacillus velezensis	0.192844	0.00100812	4.00908e+06

## Sheet: Supplementary Table S3
Supplementary Table S3. Statistical count of stability factors for Figure 8
Aside from the species column, there are a total of nine columns of data, each representing the count of nine categories of research factors for each species.
species	endonuclease	recombinase	repair	SOS	TA_system	integrase	prophage	transfer	replication_recombination_repair
Bacillus amyloliquefaciens	844	1103	1730	46	538	51	684	724	596
Bacillus atrophaeus	402	632	933	115	214	25	476	442	554
Bacillus halotolerans	276	367	458	69	96	26	157	263	369
Bacillus inaquosorum	327	611	1019	142	217	22	388	590	627
Bacillus licheniformis	506	1860	3237	273	455	247	1920	1049	1087
Bacillus mojavensis	48	67	102	11	22	1	31	39	79
Bacillus paralicheniformis	230	708	1608	136	32	53	507	277	182
Bacillus siamensis	57	72	113	3	13	3	41	59	46
Bacillus sonorensis	90	197	285	26	0	10	172	151	80
Bacillus spizizenii	526	854	1354	168	245	32	579	1121	810
Bacillus stercoris	26	43	70	14	4	2	13	29	43
Bacillus subtilis	2110	3600	5280	859	699	174	2575	5366	4520
Bacillus tequilensis	20	34	46	2	13	4	19	20	17
Bacillus vallismortis	45	100	131	14	13	4	81	115	90
Bacillus velezensis	2249	2611	4292	85	1619	94	1145	1654	1239

## Sheet: Supplementary Table S4
Supplementary Table S4. Data on the Mean Values of Corrected Distribution Positions for Figure 7
The term "average distribution position" refers to the mean value data of all distribution positions related to the features of the respective species, utilized for the presentation of scatter plots and the computation of correlation coefficients.
species	factors	genome number	average distribution position
Bacillus amyloliquefaciens	endonuclease	176	0.332408
Bacillus amyloliquefaciens	recombinase	176	0.28084
Bacillus amyloliquefaciens	repair	176	0.271432
Bacillus amyloliquefaciens	SOS	176	0.244718
Bacillus amyloliquefaciens	TA_system	176	0.168952
Bacillus amyloliquefaciens	integrase_summary	176	0.337364
Bacillus amyloliquefaciens	prophage	176	0.267222
Bacillus amyloliquefaciens	transfer	176	0.209959
Bacillus amyloliquefaciens	replication_recombination_repair	176	0.295951
Bacillus inaquosorum	endonuclease	106	0.079943
Bacillus inaquosorum	recombinase	106	0.080942
Bacillus inaquosorum	repair	106	0.068619
Bacillus inaquosorum	SOS	106	0.063341
Bacillus inaquosorum	TA_system	106	0.0693
Bacillus inaquosorum	integrase_summary	106	0.046376
Bacillus inaquosorum	prophage	106	0.07084
Bacillus inaquosorum	transfer	106	0.064076
Bacillus inaquosorum	replication_recombination_repair	106	0.073956
Bacillus paralicheniformis	endonuclease	136	0.172452
Bacillus paralicheniformis	recombinase	136	0.158862
Bacillus paralicheniformis	repair	136	0.142203
Bacillus paralicheniformis	SOS	136	0.09433
Bacillus paralicheniformis	TA_system	136	0.171426
Bacillus paralicheniformis	integrase_summary	136	0.197823
Bacillus paralicheniformis	prophage	136	0.155383
Bacillus paralicheniformis	transfer	136	0.105229
Bacillus paralicheniformis	replication_recombination_repair	136	0.133327
Bacillus spizizenii	endonuclease	140	0.073482
Bacillus spizizenii	recombinase	140	0.064183
Bacillus spizizenii	repair	140	0.051765
Bacillus spizizenii	SOS	140	0.059431
Bacillus spizizenii	TA_system	140	0.050164
Bacillus spizizenii	integrase_summary	140	0.040715
Bacillus spizizenii	prophage	140	0.057322
Bacillus spizizenii	transfer	140	0.050409
Bacillus spizizenii	replication_recombination_repair	140	0.059966
Bacillus tequilensis	endonuclease	5	0.264105
Bacillus tequilensis	recombinase	5	0.135082
Bacillus tequilensis	repair	5	0.109584
Bacillus tequilensis	SOS	5	0.22589
Bacillus tequilensis	TA_system	5	0.101745
Bacillus tequilensis	integrase_summary	5	0.021096
Bacillus tequilensis	prophage	5	0.116004
Bacillus tequilensis	transfer	5	0.146441
Bacillus tequilensis	replication_recombination_repair	5	0.265523
Bacillus atrophaeus	endonuclease	93	0.135749
Bacillus atrophaeus	recombinase	93	0.123892
Bacillus atrophaeus	repair	93	0.114505
Bacillus atrophaeus	SOS	93	0.102607
Bacillus atrophaeus	TA_system	93	0.102356
Bacillus atrophaeus	integrase_summary	93	0.080793
Bacillus atrophaeus	prophage	93	0.101162
Bacillus atrophaeus	transfer	93	0.08591
Bacillus atrophaeus	replication_recombination_repair	93	0.11591
Bacillus licheniformis	endonuclease	274	0.126832
Bacillus licheniformis	recombinase	274	0.133431
Bacillus licheniformis	repair	274	0.110601
Bacillus licheniformis	SOS	274	0.070176
Bacillus licheniformis	TA_system	274	0.152427
Bacillus licheniformis	integrase_summary	274	0.140515
Bacillus licheniformis	prophage	274	0.137888
Bacillus licheniformis	transfer	274	0.101204
Bacillus licheniformis	replication_recombination_repair	274	0.111043
Bacillus siamensis	endonuclease	11	0.262006
Bacillus siamensis	recombinase	11	0.24803
Bacillus siamensis	repair	11	0.207293
Bacillus siamensis	SOS	11	0.284778
Bacillus siamensis	TA_system	11	0.219268
Bacillus siamensis	integrase_summary	11	0.110971
Bacillus siamensis	prophage	11	0.292484
Bacillus siamensis	transfer	11	0.138654
Bacillus siamensis	replication_recombination_repair	11	0.2373
Bacillus stercoris	endonuclease	8	0.152556
Bacillus stercoris	recombinase	8	0.120663
Bacillus stercoris	repair	8	0.137239
Bacillus stercoris	SOS	8	0.087285
Bacillus stercoris	TA_system	8	0.043909
Bacillus stercoris	integrase_summary	8	0.026218
Bacillus stercoris	prophage	8	0.100225
Bacillus stercoris	transfer	8	0.084052
Bacillus stercoris	replication_recombination_repair	8	0.200324
Bacillus vallismortis	endonuclease	13	0.088189
Bacillus vallismortis	recombinase	13	0.071194
Bacillus vallismortis	repair	13	0.083546
Bacillus vallismortis	SOS	13	0.113577
Bacillus vallismortis	TA_system	13	0.069078
Bacillus vallismortis	integrase_summary	13	0.046591
Bacillus vallismortis	prophage	13	0.092215
Bacillus vallismortis	transfer	13	0.152261
Bacillus vallismortis	replication_recombination_repair	13	0.124074
Bacillus halotolerans	endonuclease	56	0.238317
Bacillus halotolerans	recombinase	56	0.22011
Bacillus halotolerans	repair	56	0.162172
Bacillus halotolerans	SOS	56	0.220862
Bacillus halotolerans	TA_system	56	0.124583
Bacillus halotolerans	integrase_summary	56	0.185288
Bacillus halotolerans	prophage	56	0.193161
Bacillus halotolerans	transfer	56	0.140751
Bacillus halotolerans	replication_recombination_repair	56	0.249611
Bacillus mojavensis	endonuclease	11	0.183548
Bacillus mojavensis	recombinase	11	0.190228
Bacillus mojavensis	repair	11	0.12199
Bacillus mojavensis	SOS	11	0.164047
Bacillus mojavensis	TA_system	11	0.09555
Bacillus mojavensis	integrase_summary	11	0.109262
Bacillus mojavensis	prophage	11	0.16807
Bacillus mojavensis	transfer	11	0.097914
Bacillus mojavensis	replication_recombination_repair	11	0.159226
Bacillus sonorensis	endonuclease	26	0.094785
Bacillus sonorensis	recombinase	26	0.109118
Bacillus sonorensis	repair	26	0.078505
Bacillus sonorensis	SOS	26	0.072752
Bacillus sonorensis	integrase_summary	26	0.261533
Bacillus sonorensis	prophage	26	0.140972
Bacillus sonorensis	transfer	26	0.102599
Bacillus sonorensis	replication_recombination_repair	26	0.117614
Bacillus subtilis	endonuclease	571	0.28468
Bacillus subtilis	recombinase	571	0.275159
Bacillus subtilis	repair	571	0.21064
Bacillus subtilis	SOS	571	0.270552
Bacillus subtilis	TA_system	571	0.219215
Bacillus subtilis	integrase_summary	571	0.278609
Bacillus subtilis	prophage	571	0.262564
Bacillus subtilis	transfer	571	0.226832
Bacillus subtilis	replication_recombination_repair	571	0.293004
Bacillus velezensis	endonuclease	446	0.489918
Bacillus velezensis	recombinase	446	0.409428
Bacillus velezensis	repair	446	0.397626
Bacillus velezensis	SOS	446	0.400455
Bacillus velezensis	TA_system	446	0.275587
Bacillus velezensis	integrase_summary	446	0.396208
Bacillus velezensis	prophage	446	0.375244
Bacillus velezensis	transfer	446	0.337904
Bacillus velezensis	replication_recombination_repair	446	0.466789
